# Supplementary material
Source: PubMed Central journal article supplement (PMC4013293)
Supplement: NIHMS548245-supplement-2.pdf [file NIHMS548245-supplement-2.pdf]

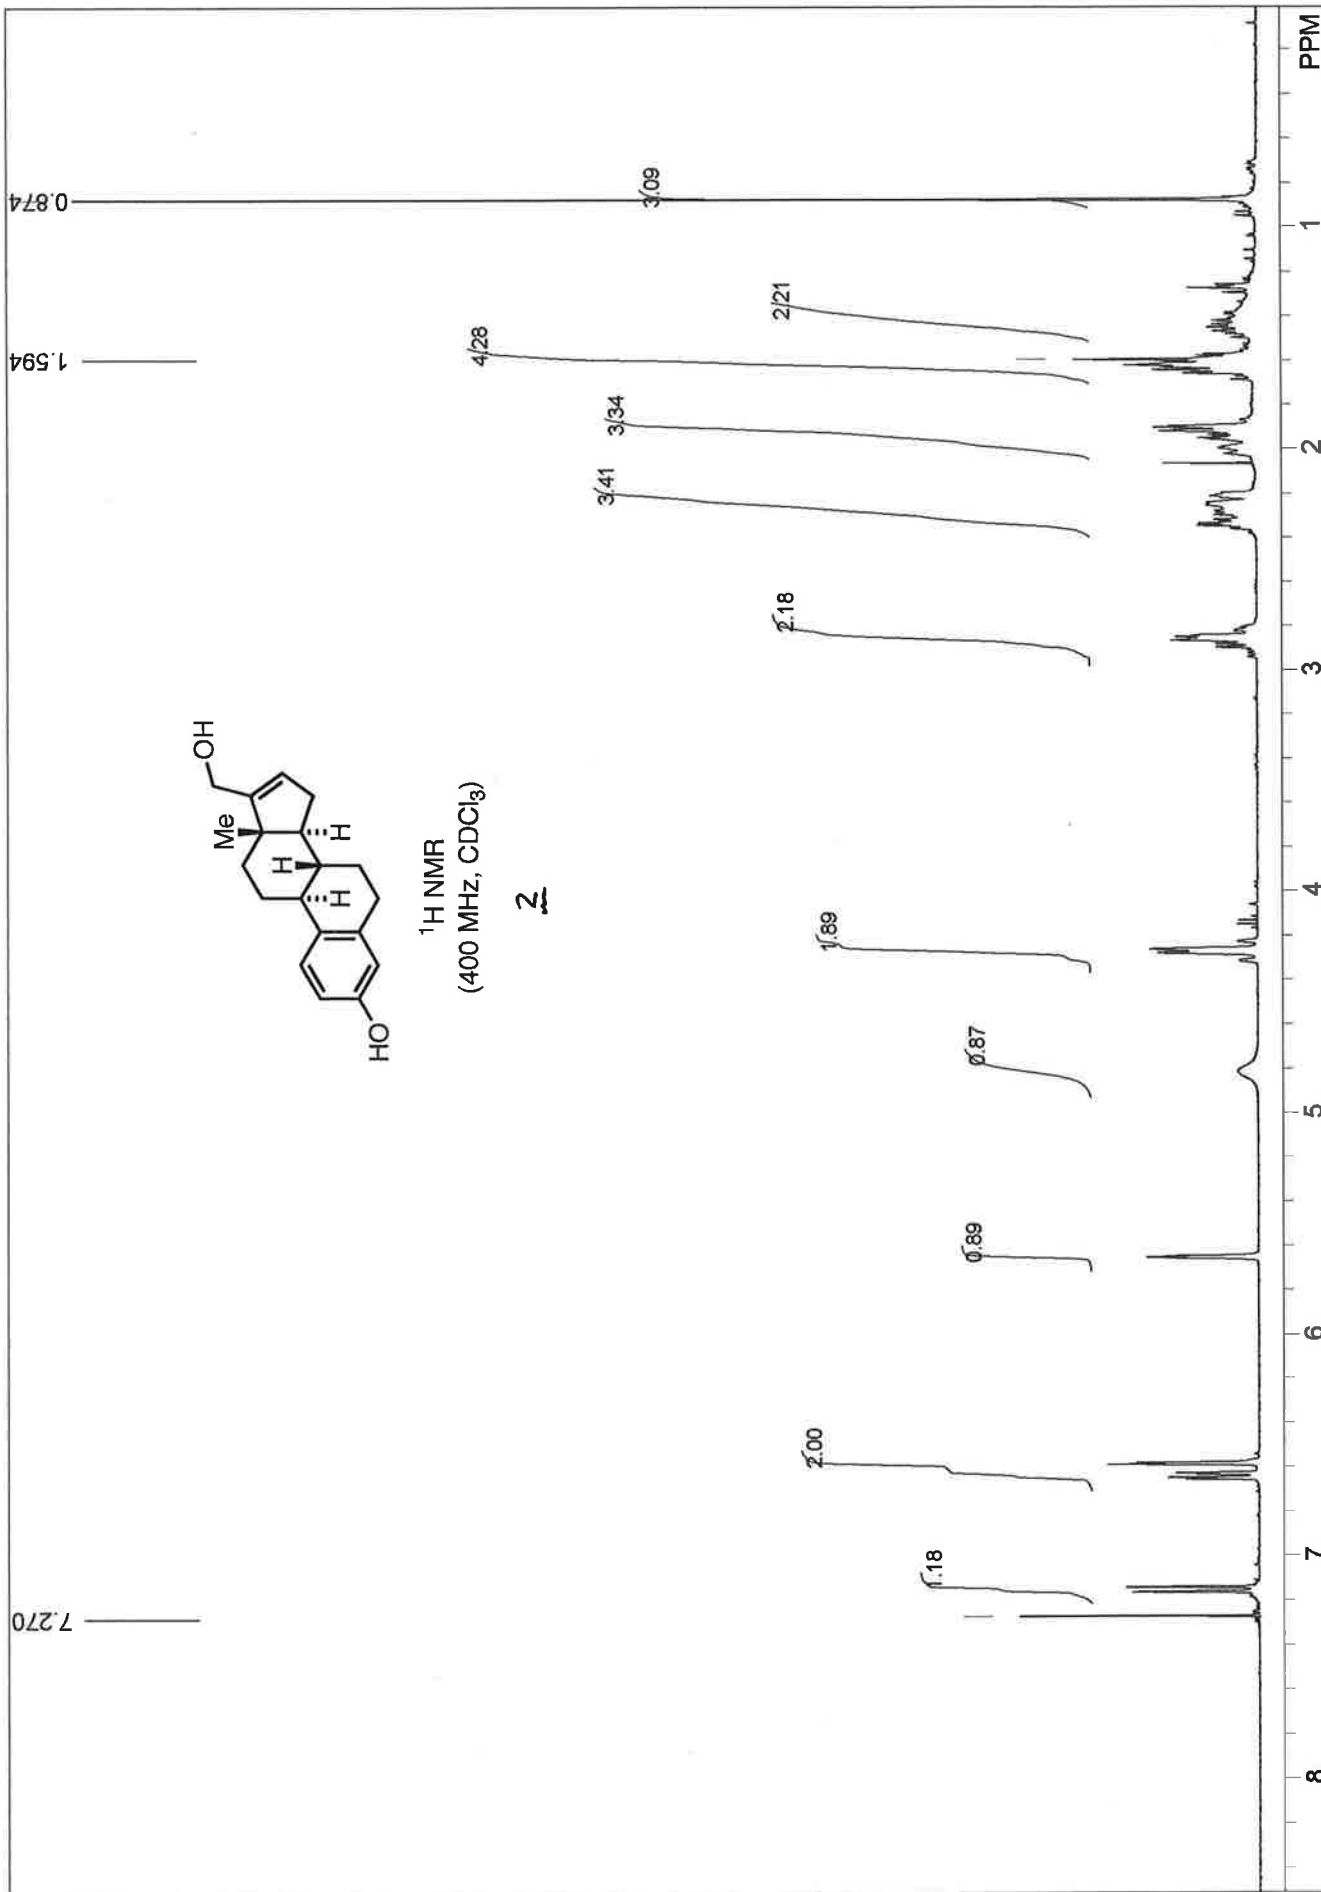

STANDARD 1H OBSERVE - profile

USER: -- DATE: Jan 24 2007

|             |            |             |              |                       |
|-------------|------------|-------------|--------------|-----------------------|
| F1: 399.751 | SW1: 6410  | OF1: 2403.1 | PTSId: 13132 | 16384                 |
| EX: s2pul   | PW: 7.7 us | PD: 1.0 sec | NA: 8        | LB: 0.0               |
|             |            |             |              | Nuts - \$gi-final.fid |

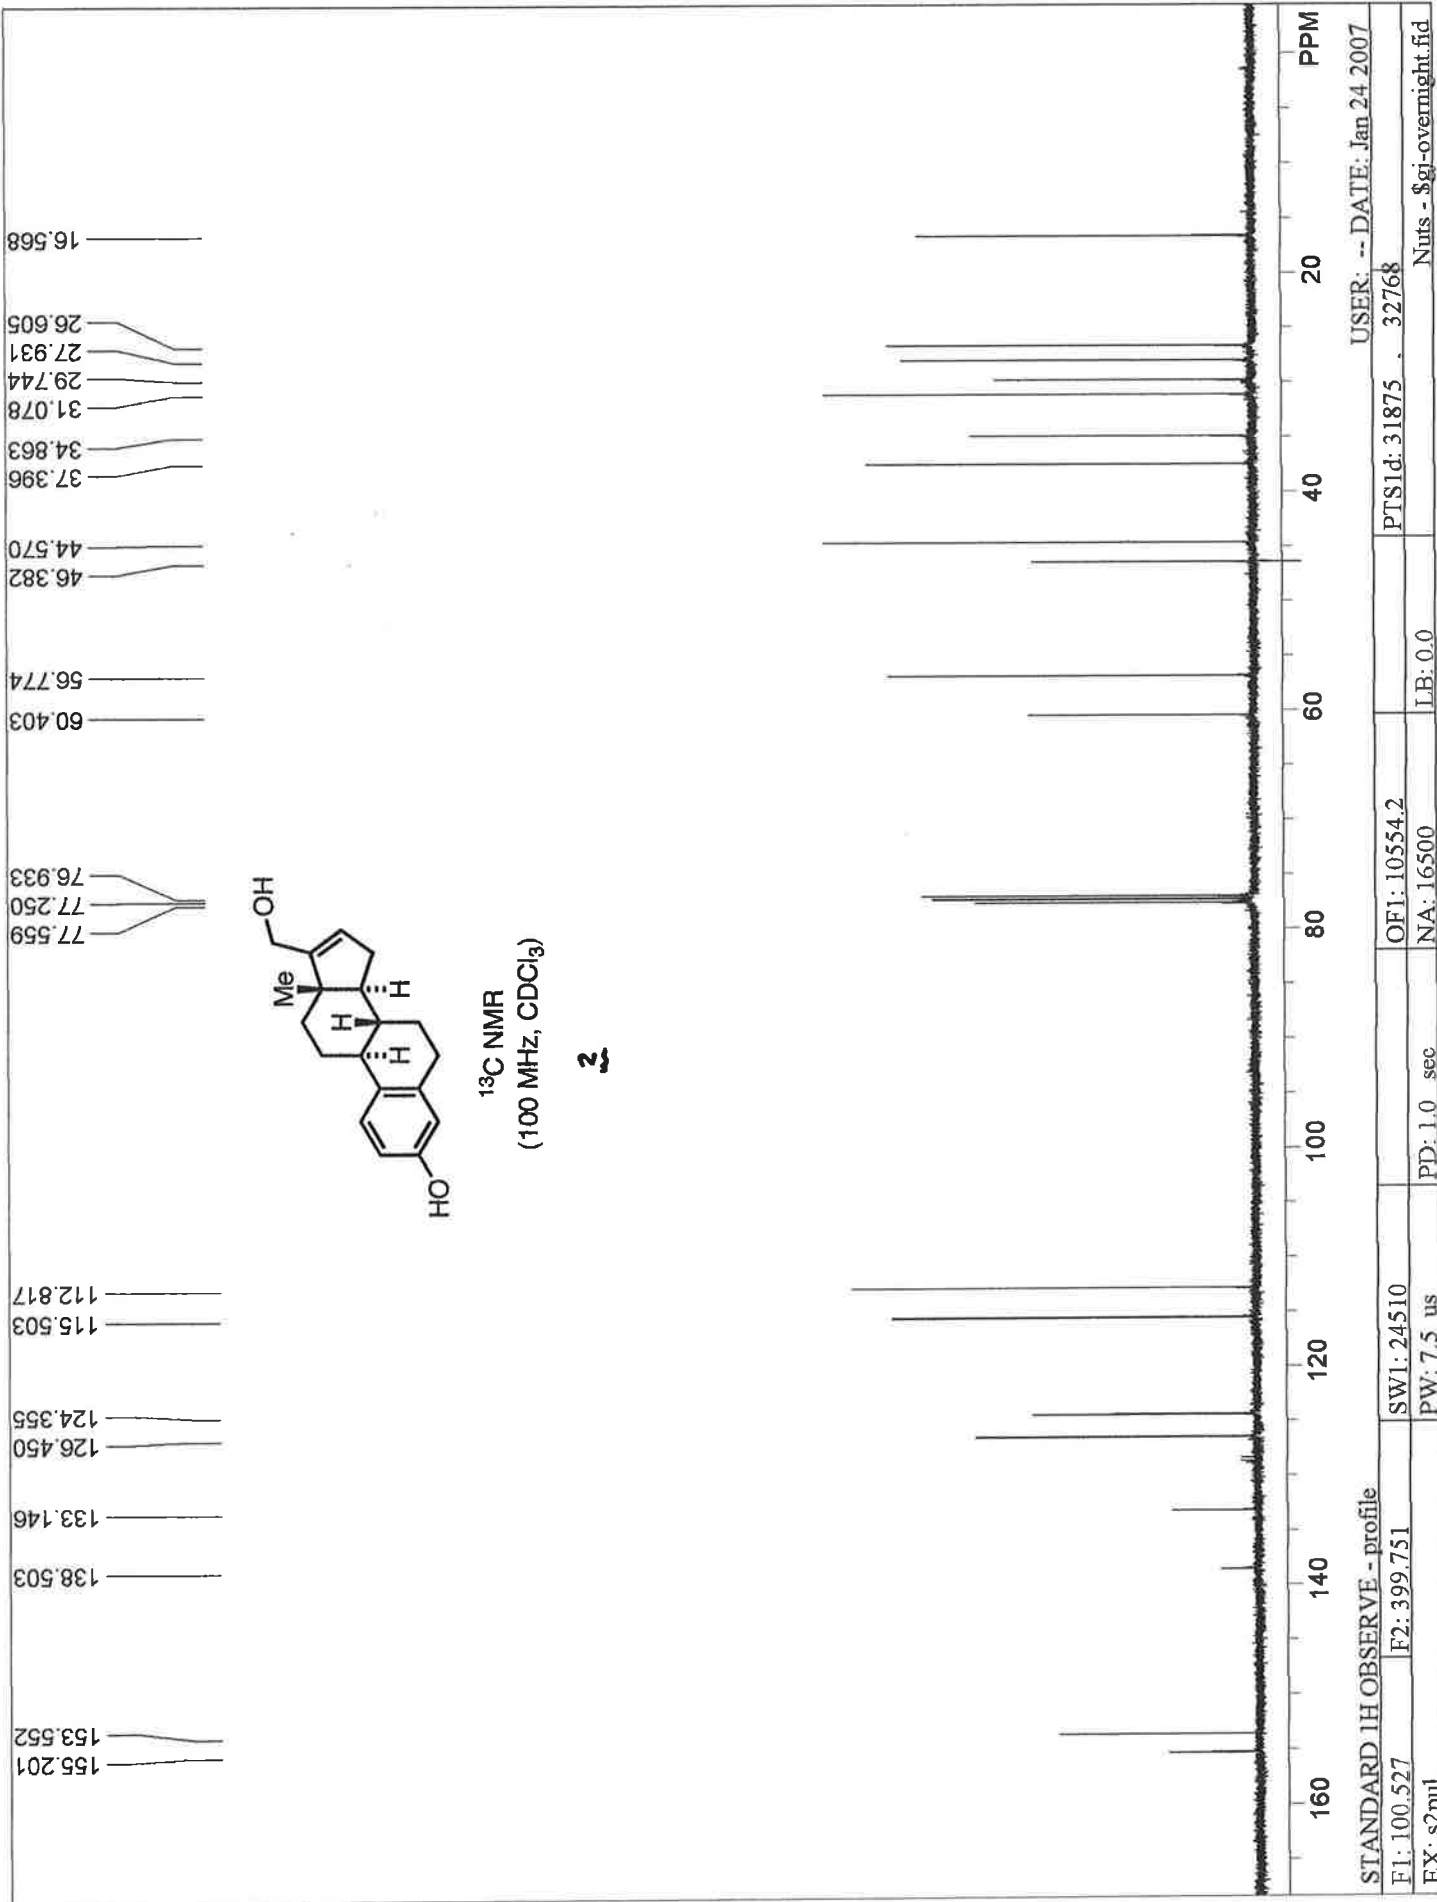

STANDARD 1H OBSERVE - profile  
 F1: 100.527 F2: 399.751 SW1: 24510 OF1: 10554.2  
 EX: s2pul PW: 7.5 us PD: 1.0 sec NA: 16500 LB: 0.0  
 PTS1d: 31875 . 32768  
 USER: -- DATE: Jan 24 2007  
 Nuts - \$gi-overnight.fid

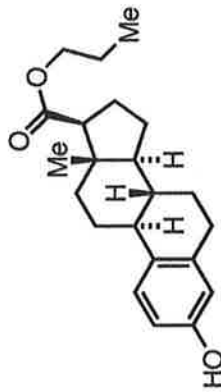

<sup>1</sup>H NMR  
(300 MHz, CDCl<sub>3</sub>)

4

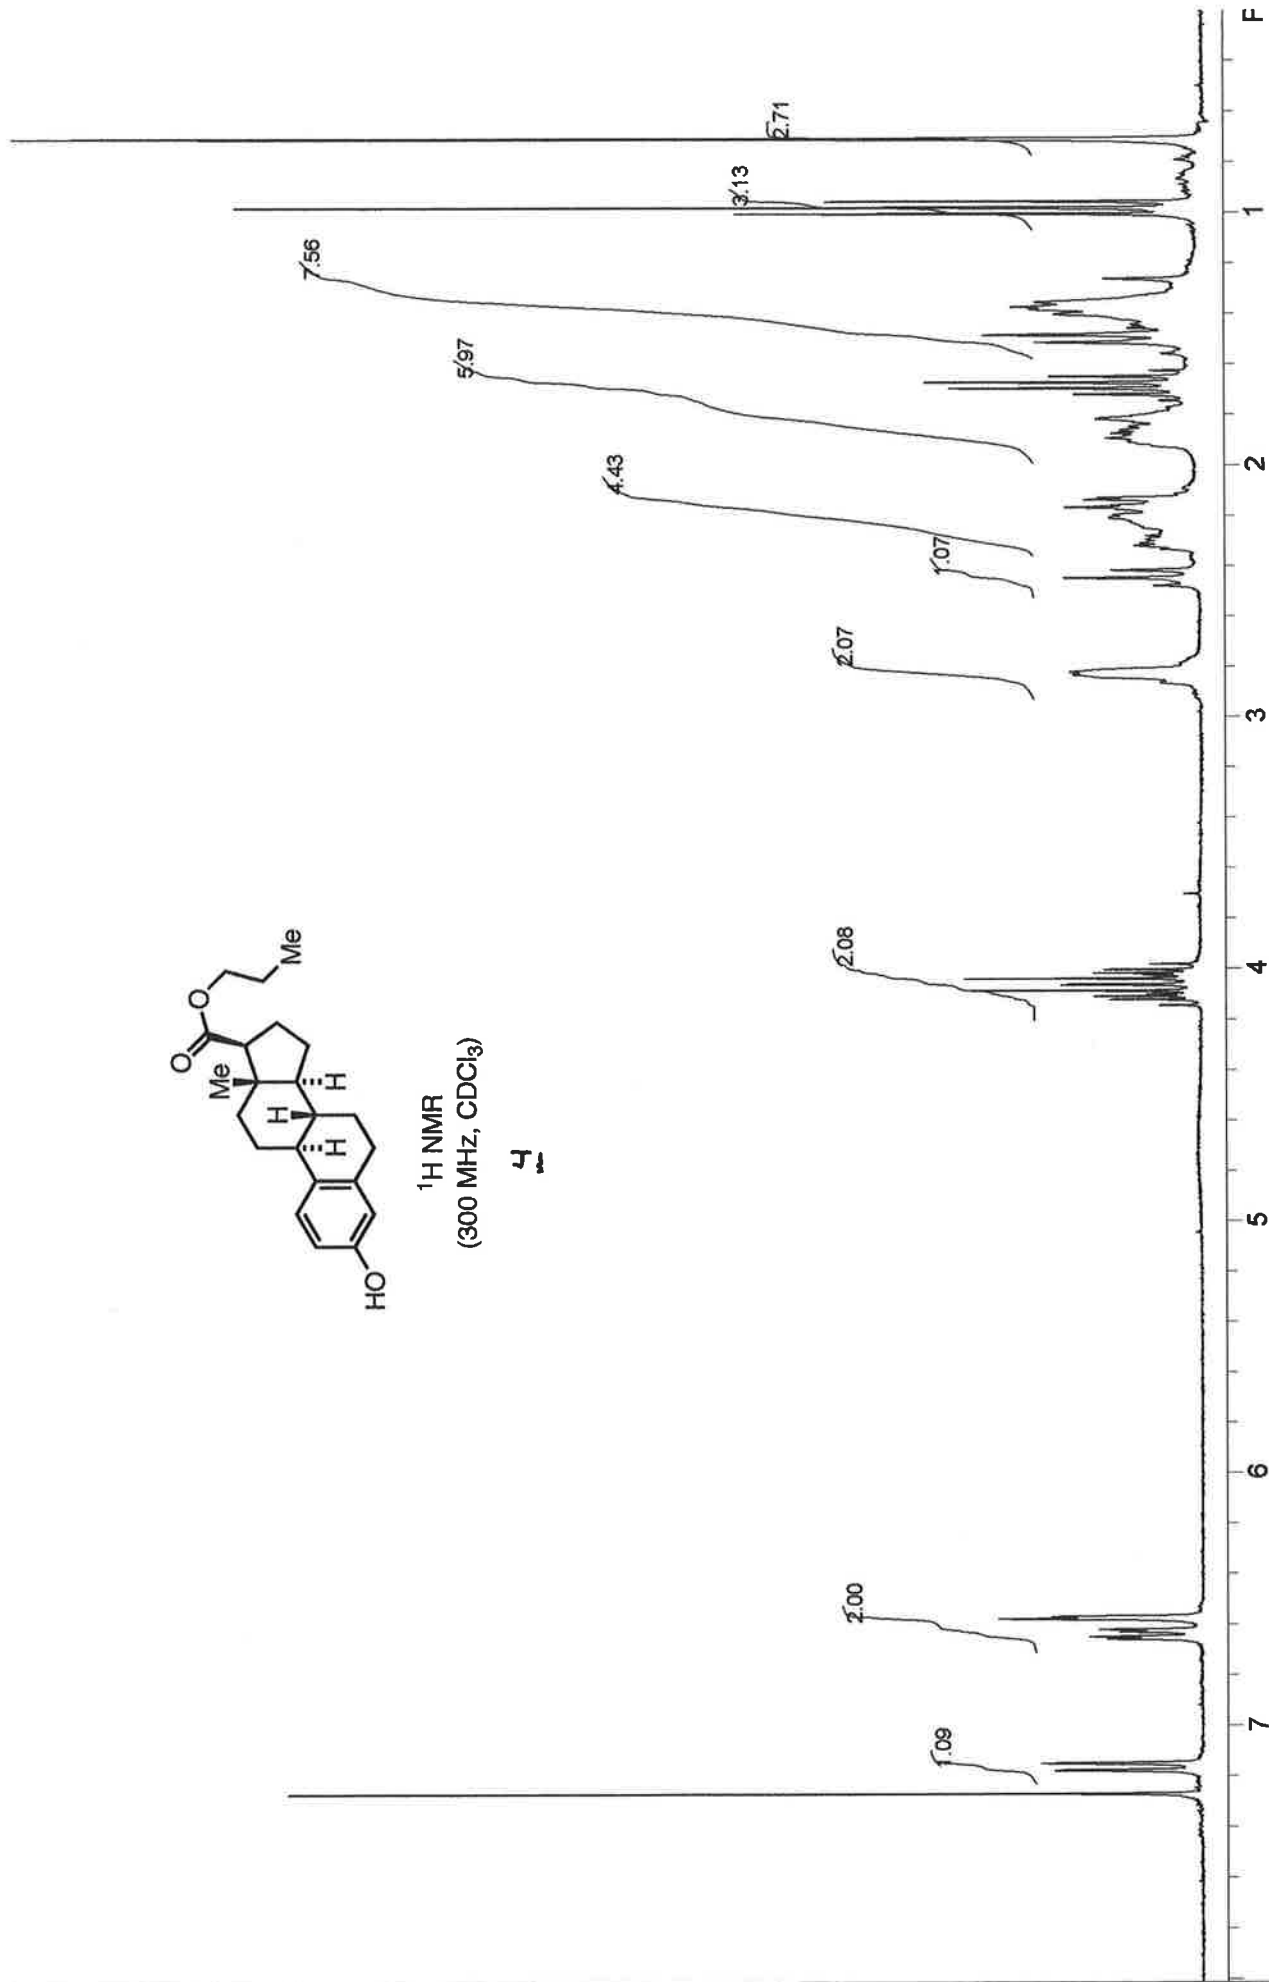

STANDARD 1H OBSERVE: blank line  
 F1: 300.142 F2: 75.478 SW1: 4803  
 EX: s2pul PW: 6.3 us PD: 1.0 sec OF1: 1803.7 NA: 8  
 USER: -- DATE: Feb 24 2009 PTS1d: 14409 16384 LB: 0.0 Nuts - SCH-Raney-Nickel-Test

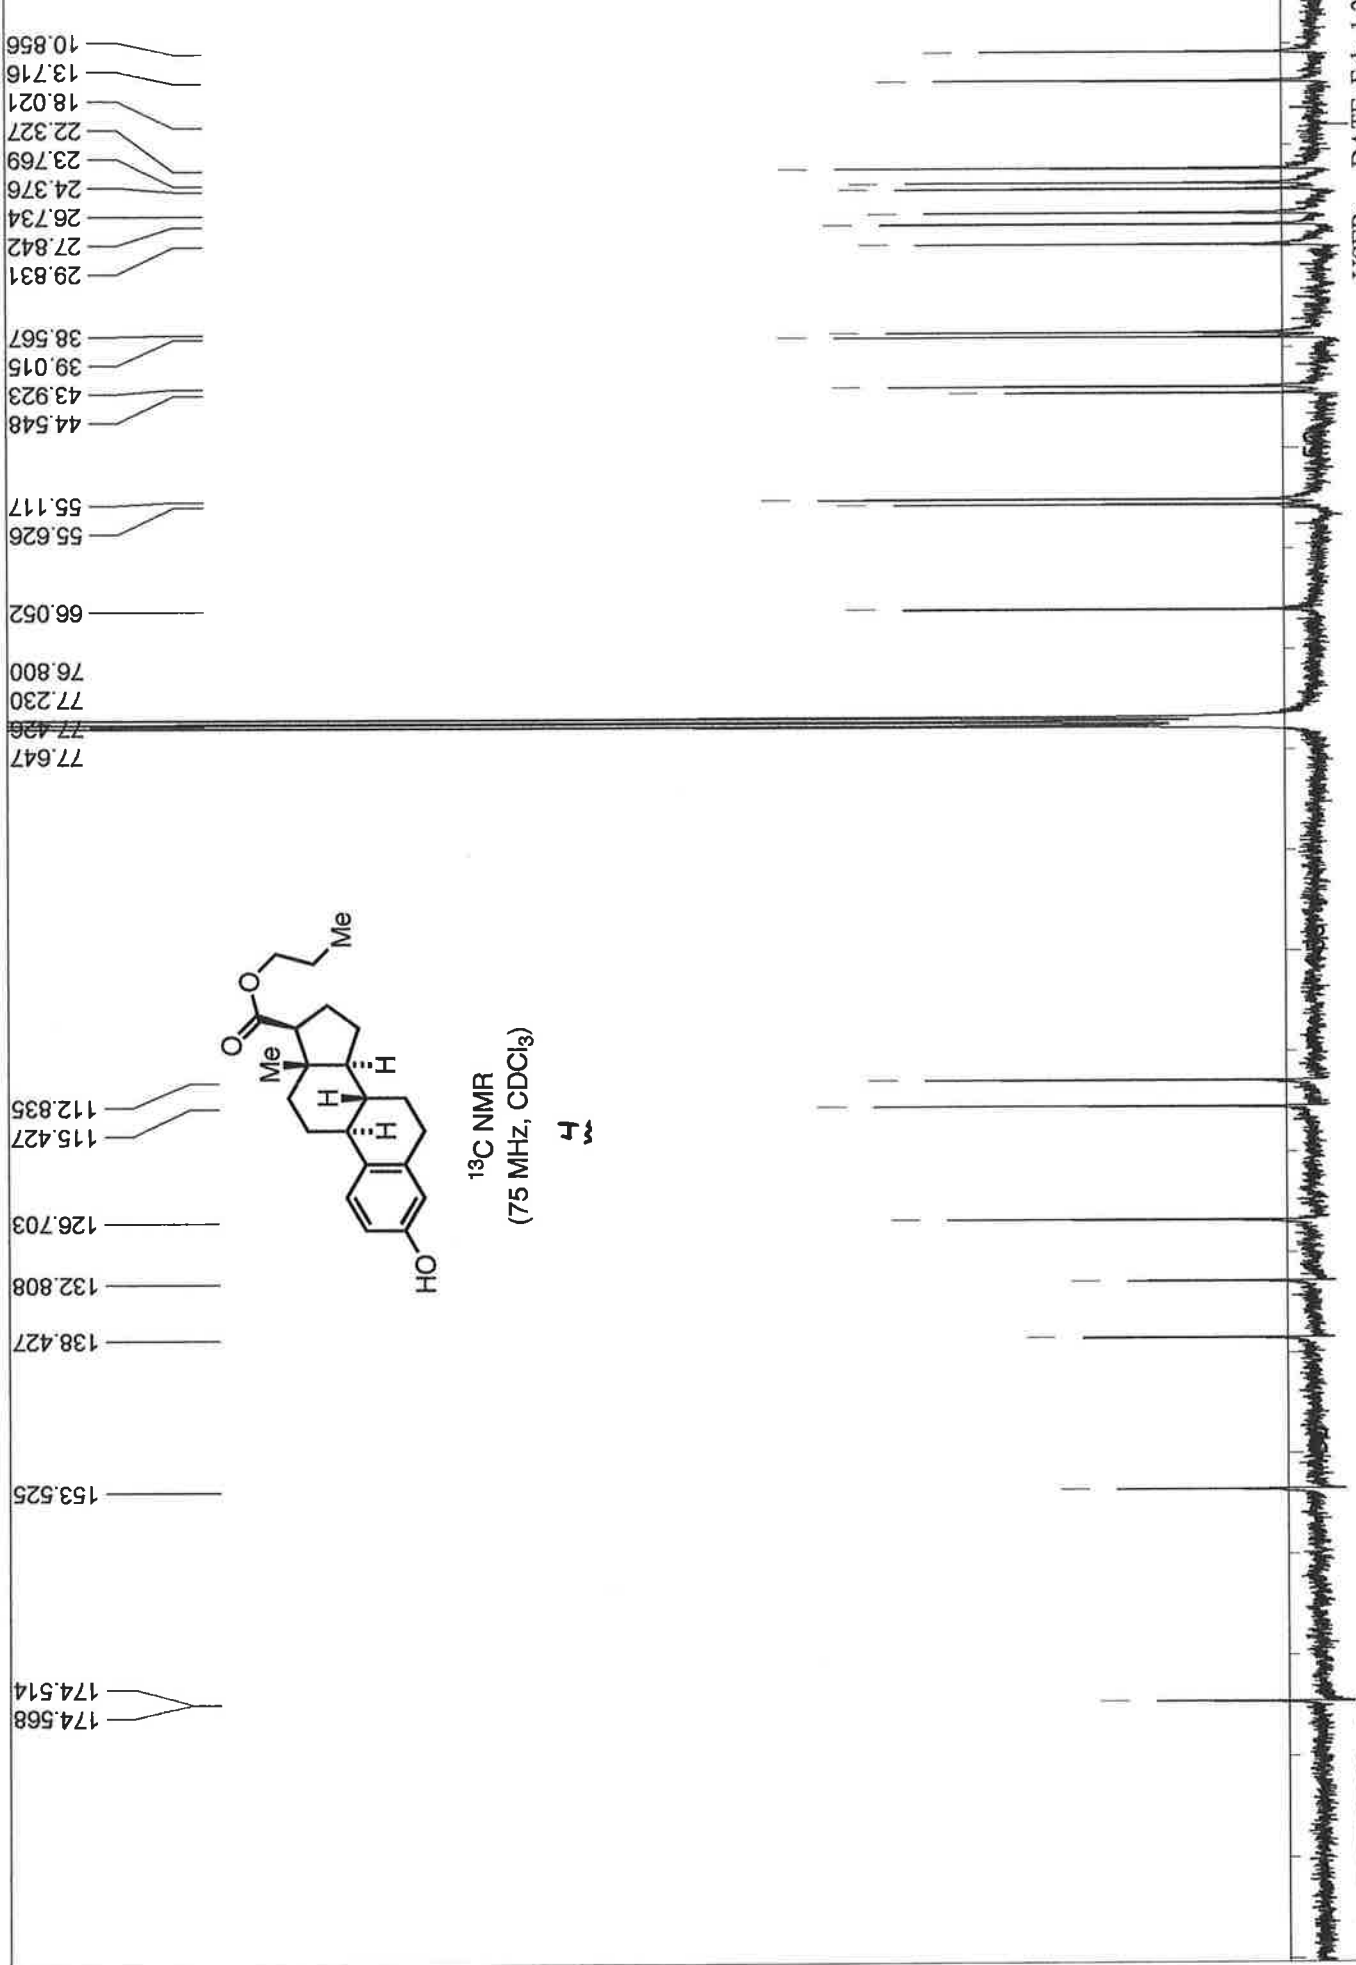

13C.OBSERVE:blank line  
 F1: 75.479 F2: 300.142  
 EX: s2pul

|             |              |                |
|-------------|--------------|----------------|
| OF1: 8291.9 | PTS1d: 18868 | DATE: Feb 1 20 |
| PD: 1.0 sec | LB: 1.5      | 32768          |
| PW: 7.3 us  |              |                |
|             |              | USER: --       |

Nuts - Sch-r-13c-2

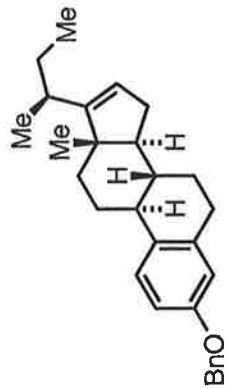

<sup>1</sup>H NMR  
(300 MHz, CDCl<sub>3</sub>)

6

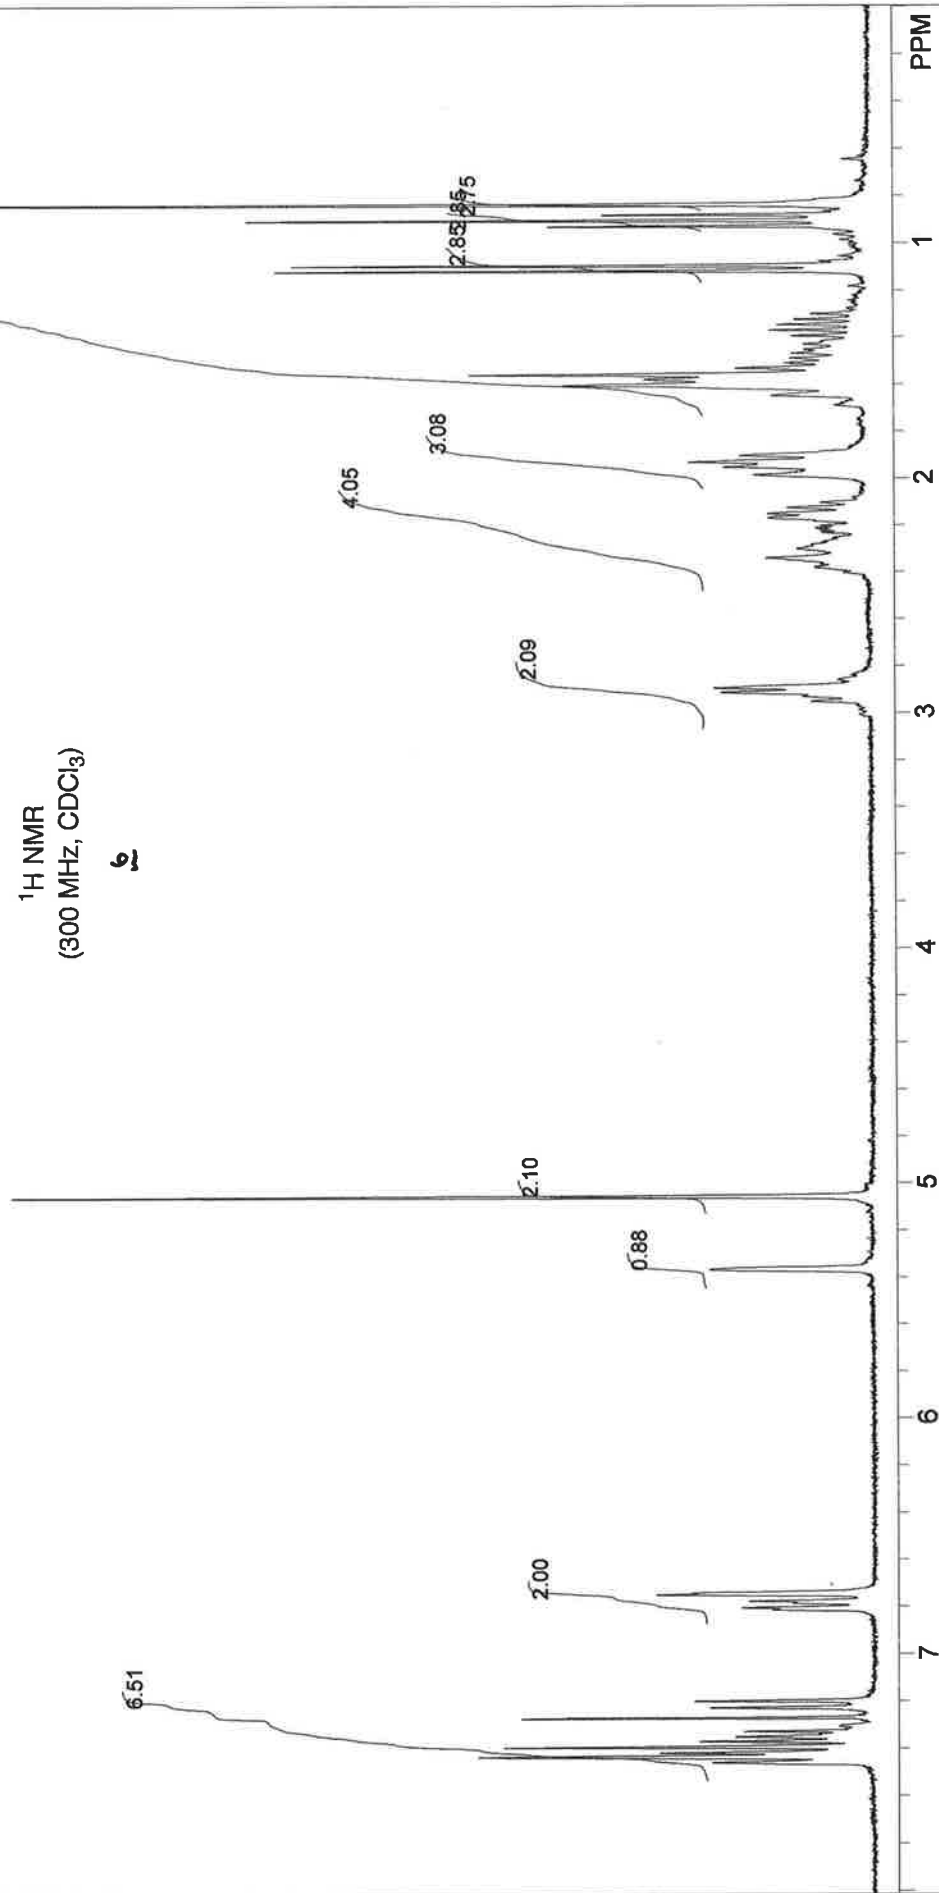

|                                 |             |                           |                      |
|---------------------------------|-------------|---------------------------|----------------------|
| STANDARD 1H OBSERVE: blank line |             | USER: -- DATE: Oct 3 2002 |                      |
| F1: 300.151                     | F2: 75.480  | PTS1d: 14430              | 16384                |
| EX: s2pul                       | PD: 1.0 sec | LB: 0.0                   | Nuts - \$zhep217.fid |
| SW1: 4810                       | OF1: 1806.5 |                           |                      |
| PW: 6.0 us                      | NA: 8       |                           |                      |

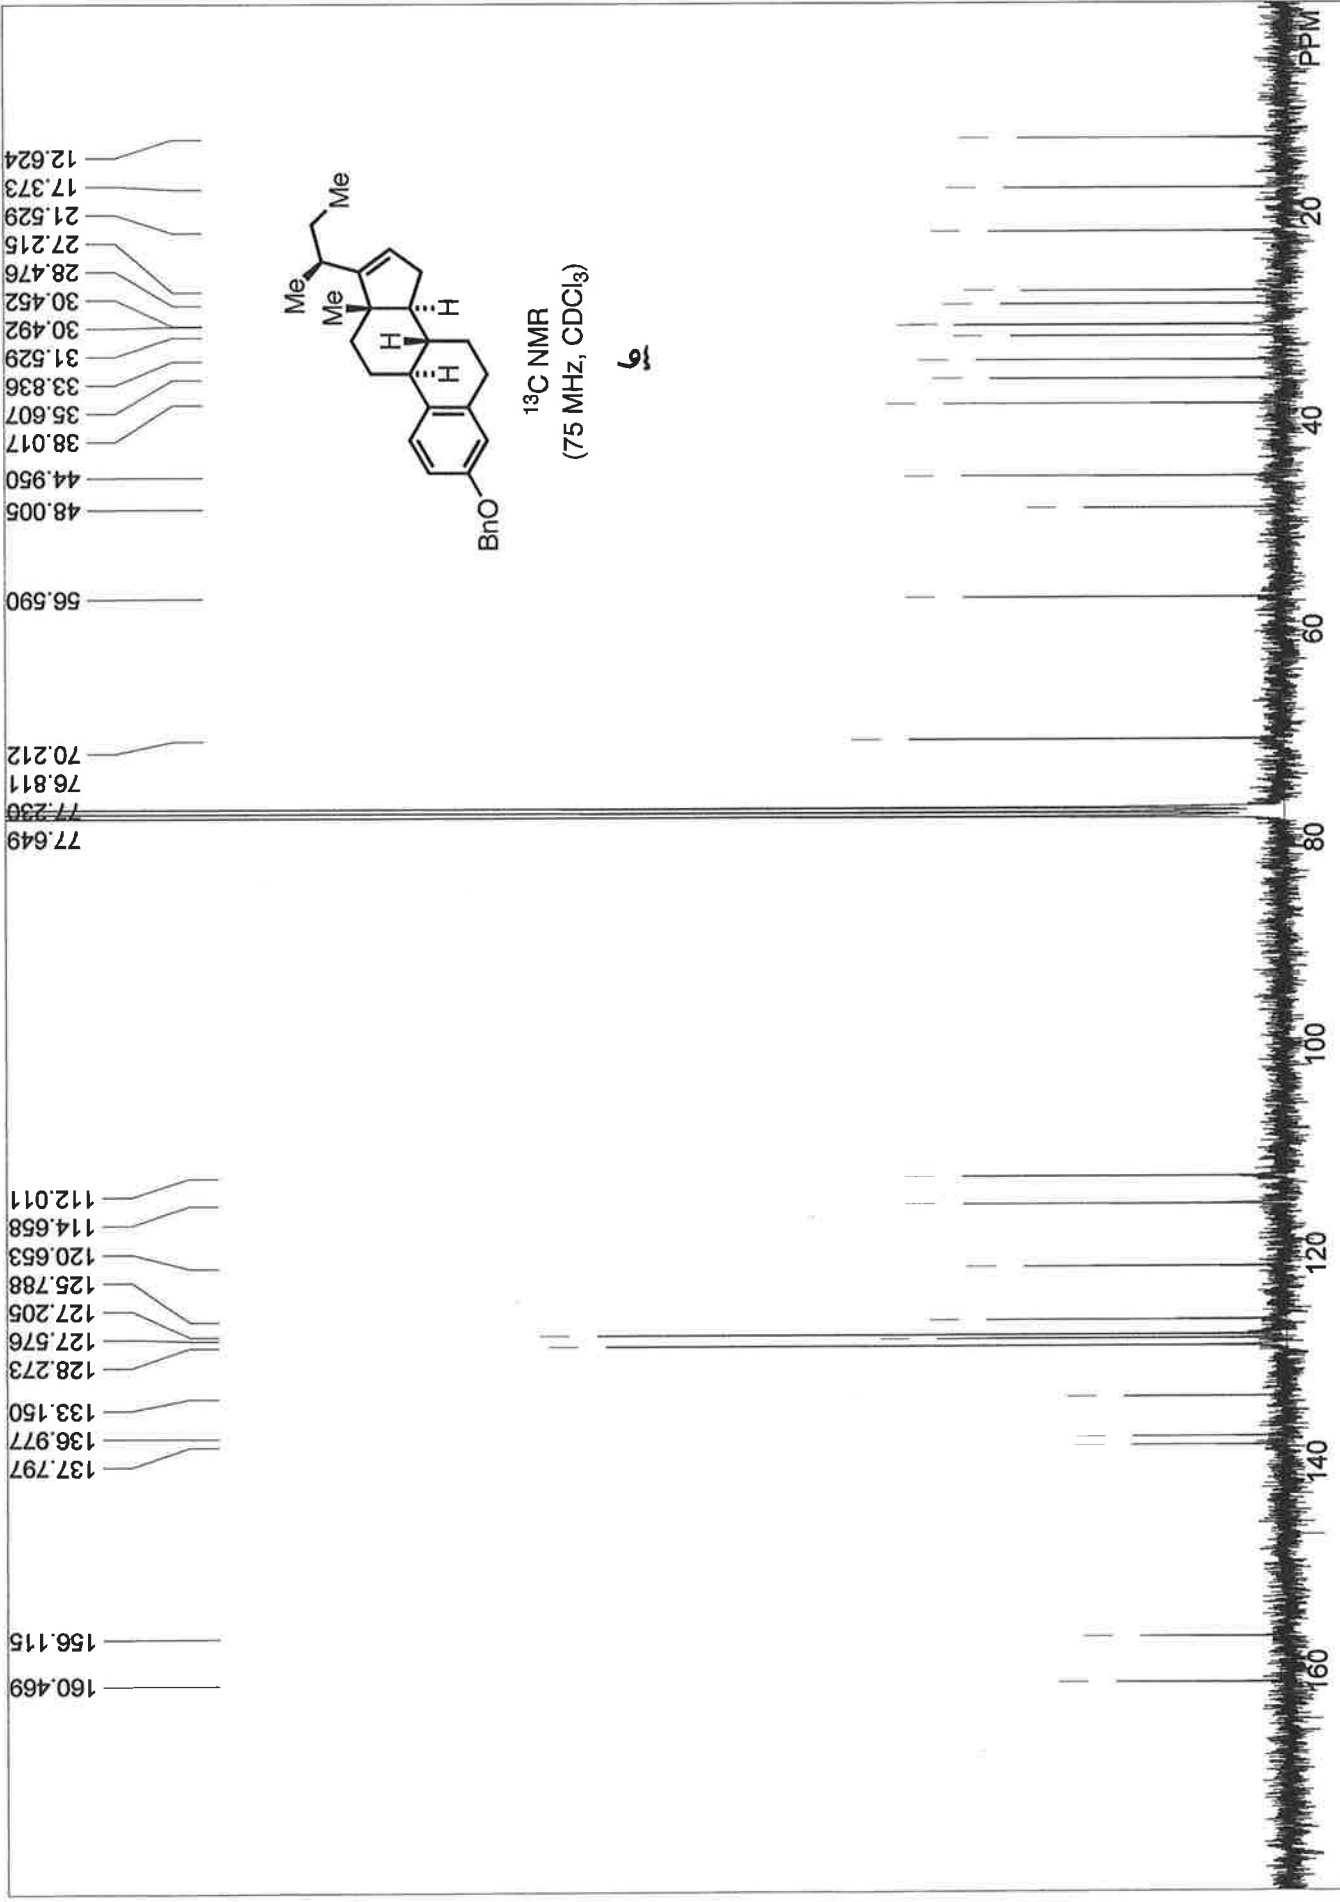

- 160.469
- 156.115
- 137.797
- 136.977
- 133.150
- 128.273
- 127.576
- 127.205
- 125.788
- 120.653
- 114.658
- 112.011
- 77.649
- 77.230
- 76.811
- 70.212
- 56.590
- 48.005
- 44.950
- 38.017
- 35.607
- 33.836
- 31.529
- 30.492
- 30.452
- 28.476
- 27.215
- 21.529
- 17.373
- 12.624

|             |             |                           |                     |
|-------------|-------------|---------------------------|---------------------|
| :blank line |             | USER: -- DATE: Oct 3 2002 |                     |
| F1: 75.481  | F2: 300.150 | PTS1d: 18868              | 32768               |
| EX: s2pul   |             | LB: 1.0                   | Nuts - \$CARBON.fid |
|             | SW1: 18868  | OF1: 8277.1               |                     |
|             | PW: 7.3 us  | NA: 5000                  |                     |
|             | PD: 1.0 sec |                           |                     |

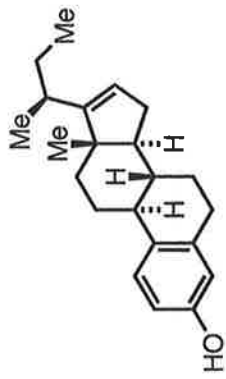

<sup>1</sup>H NMR  
(300 MHz, d<sub>6</sub>-acetone)

7

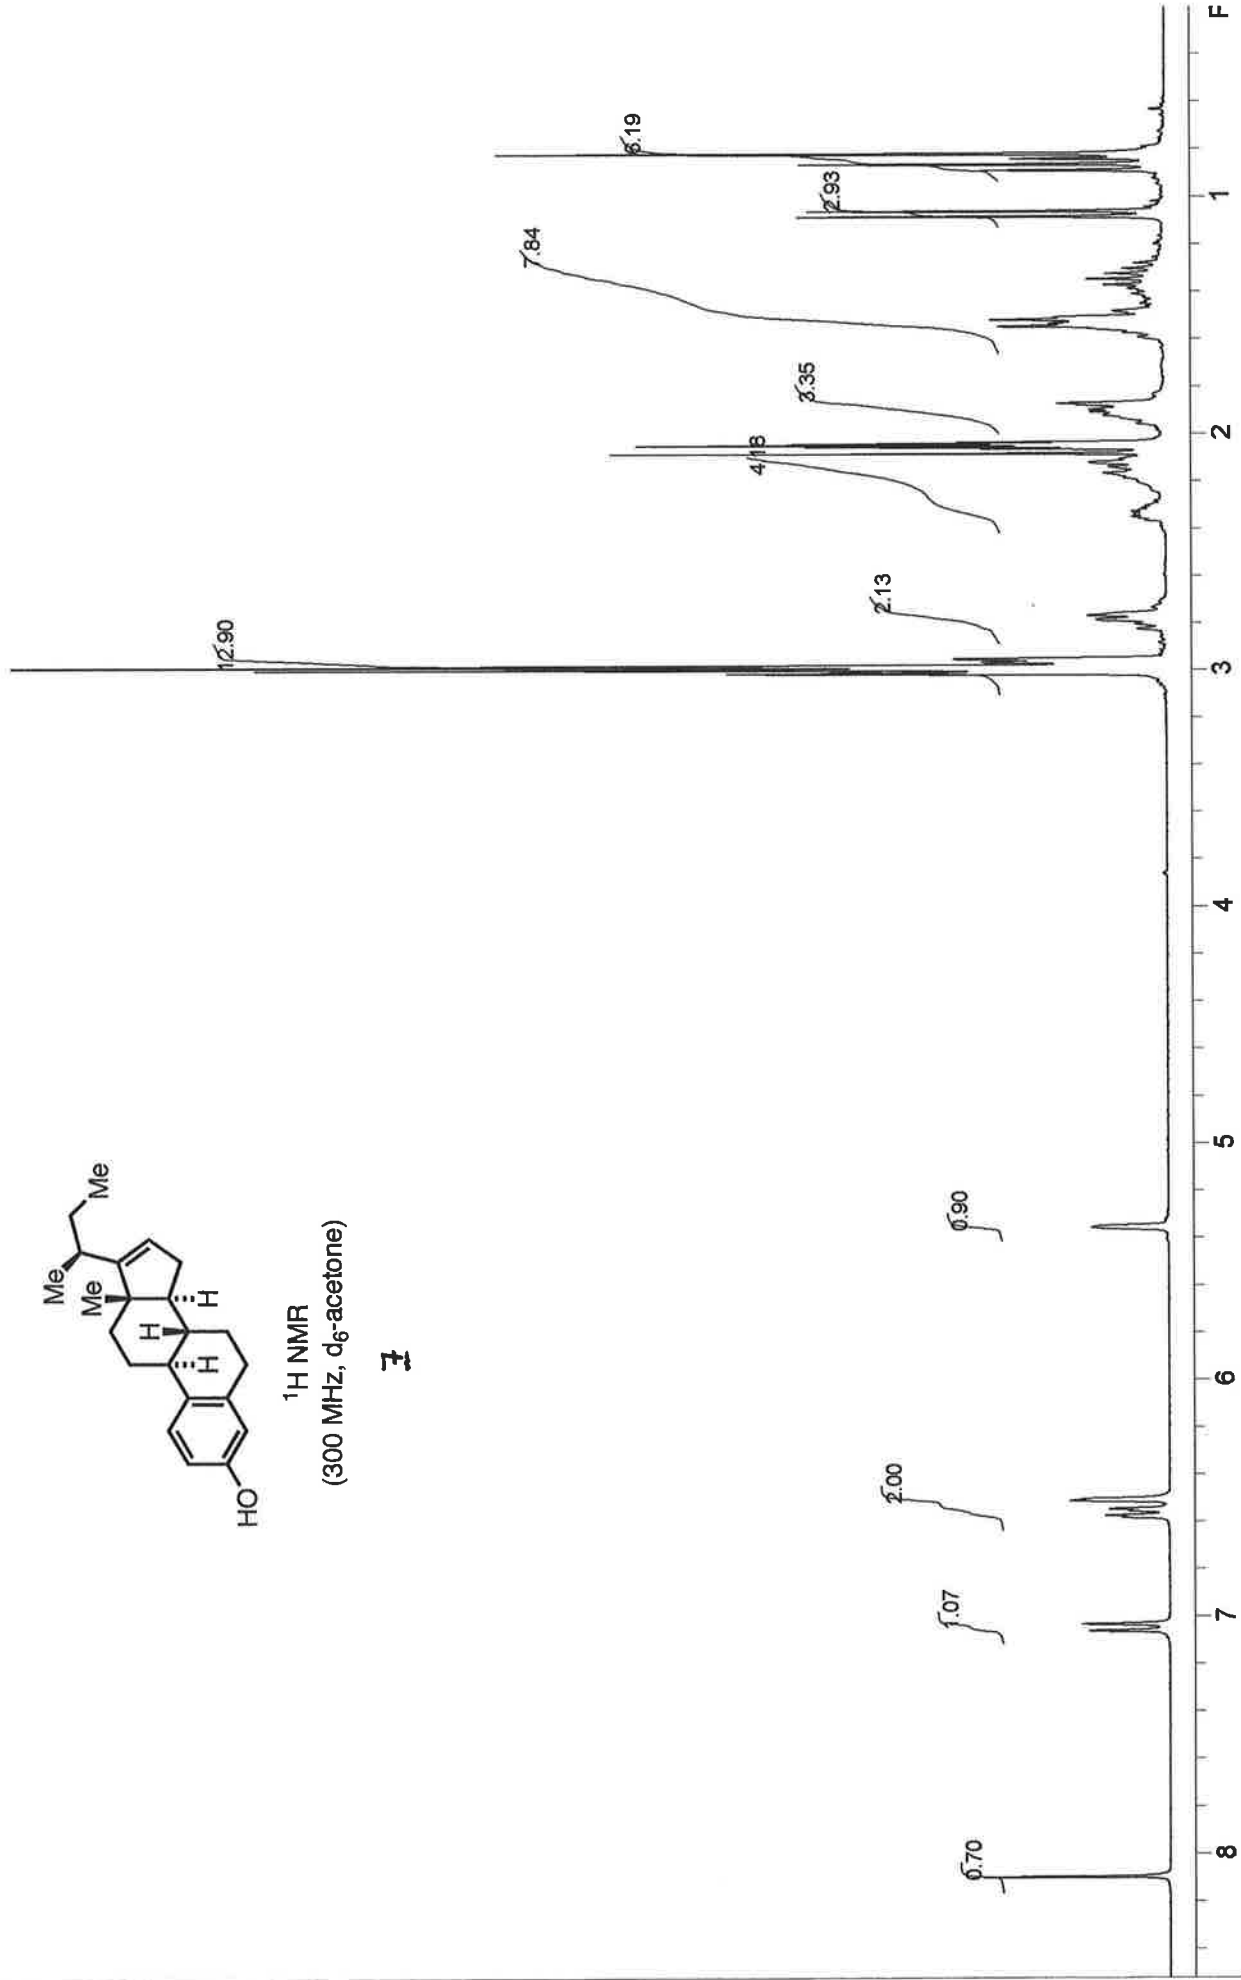

STANDARD 1H OBSERVE: blank line  
 F1: 300.152 F2: 75.480 SW1: 4810  
 EX: s2pul PW: 6.0 us PD: 1.0 sec OF1: 1795.3 NA: 8  
 PTS1d: 14430 16384 LB: 0.0  
 USER: -- DATE: Oct. 8 20 Nuts - \$zhep218

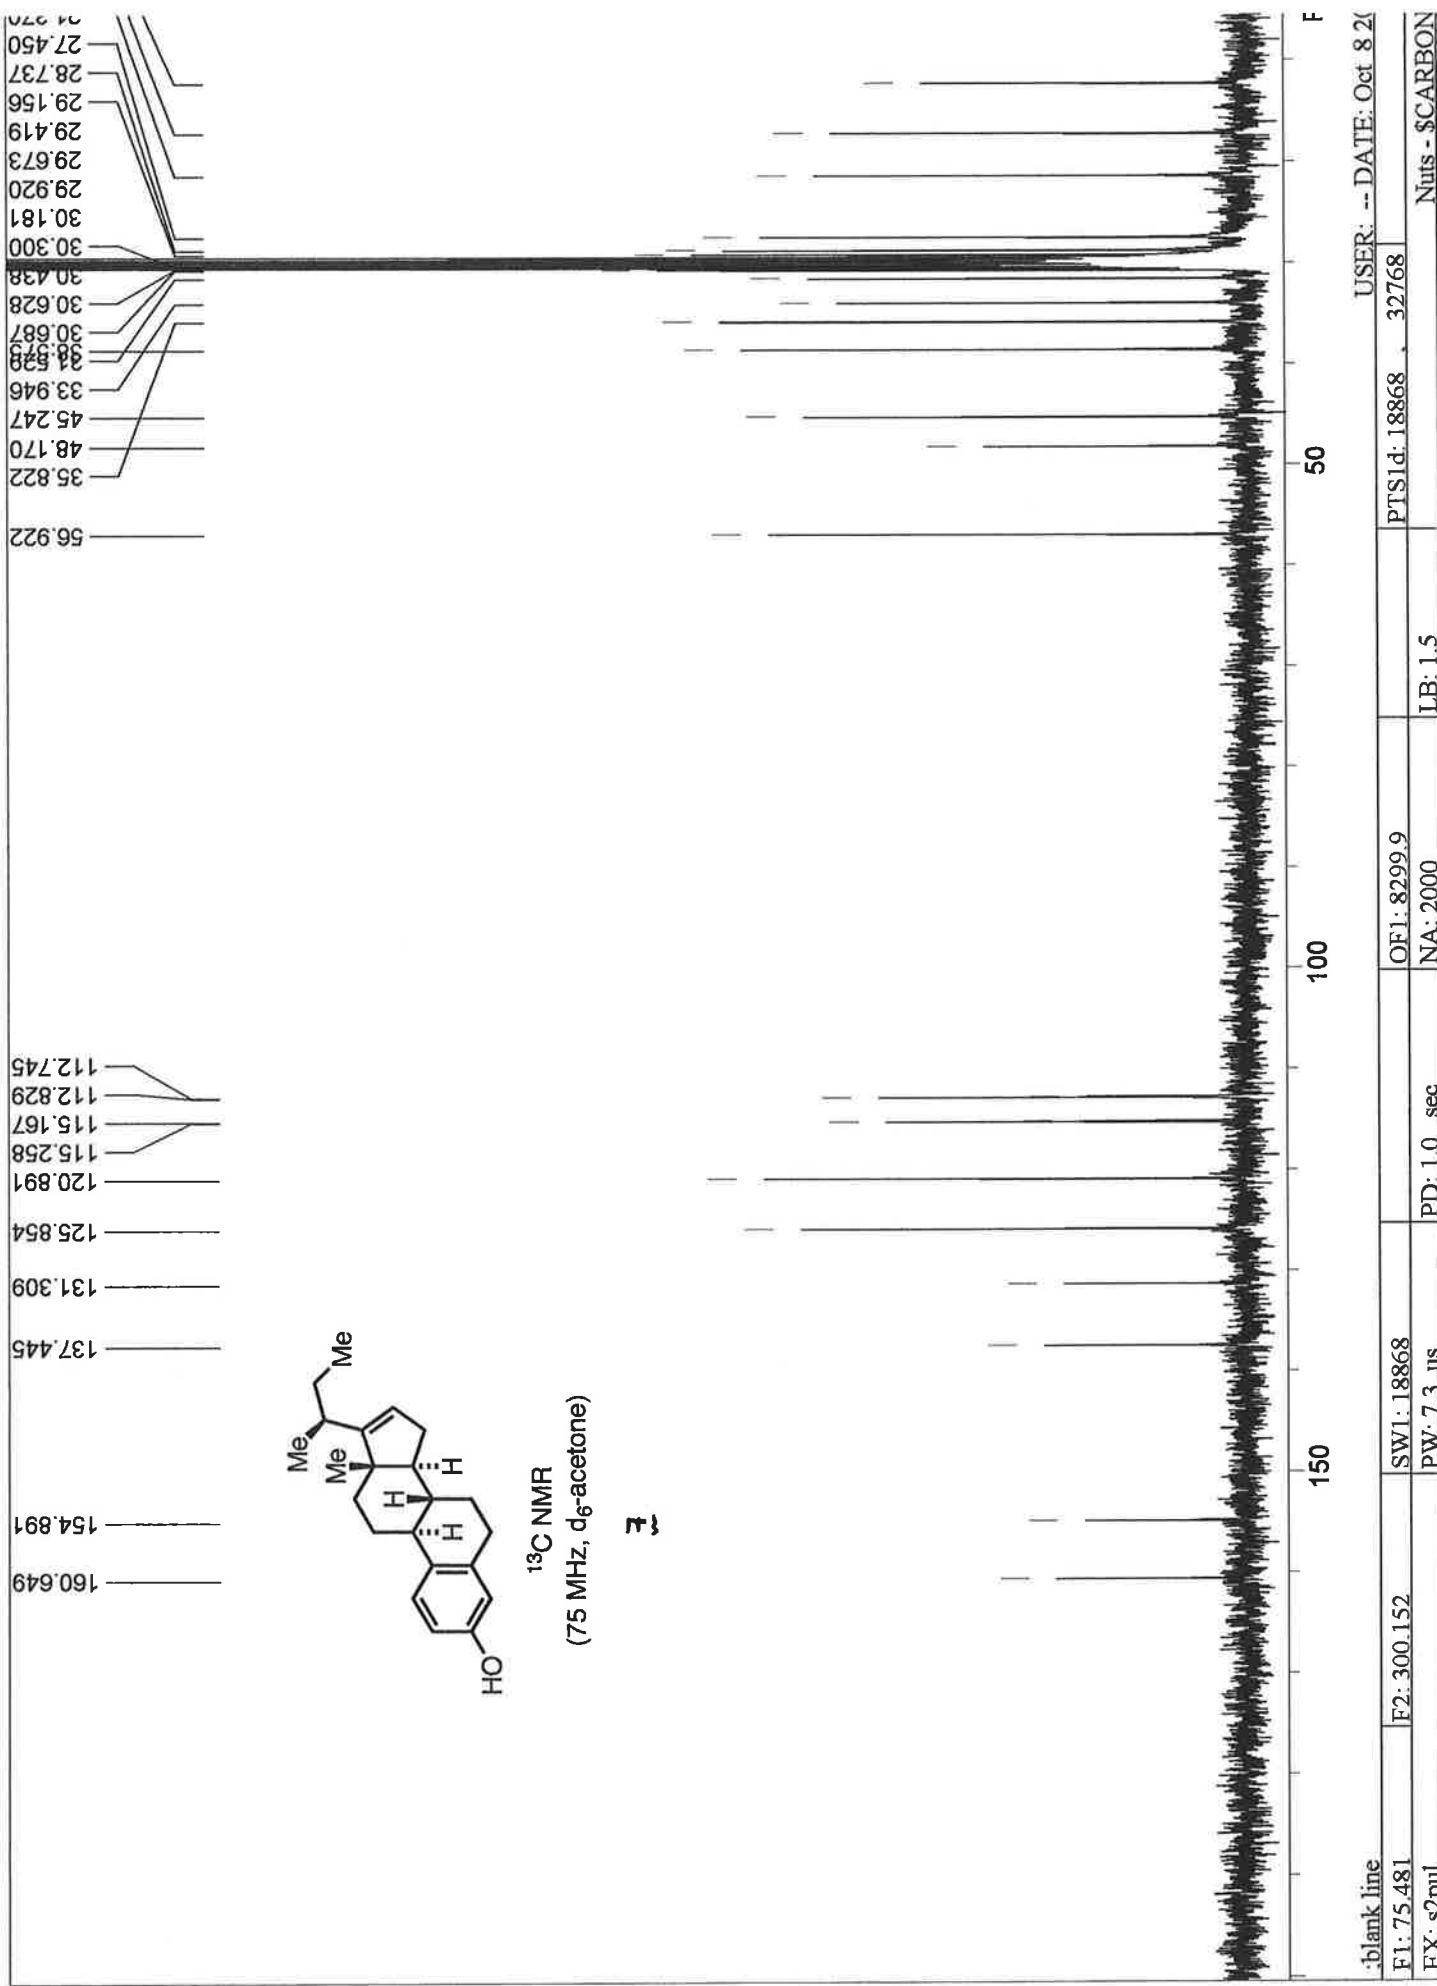

|             |             |                         |                  |
|-------------|-------------|-------------------------|------------------|
| .blank line |             | USER: -- DATE: Oct 8 21 |                  |
| F1: 75.481  | F2: 300.152 | PTSId: 18868            | 32768            |
| EX: s2pul   |             | LB: 1.5                 | Nbits - \$CARBON |
|             |             | OF1: 8299.9             |                  |
|             |             | NA: 2000                |                  |
|             |             | PD: 1.0 sec             |                  |
|             |             | PW: 7.3 us              |                  |
|             |             | SW1: 18868              |                  |



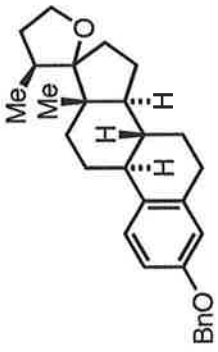

<sup>1</sup>H NMR  
(300 MHz, CDCl<sub>3</sub>)

9

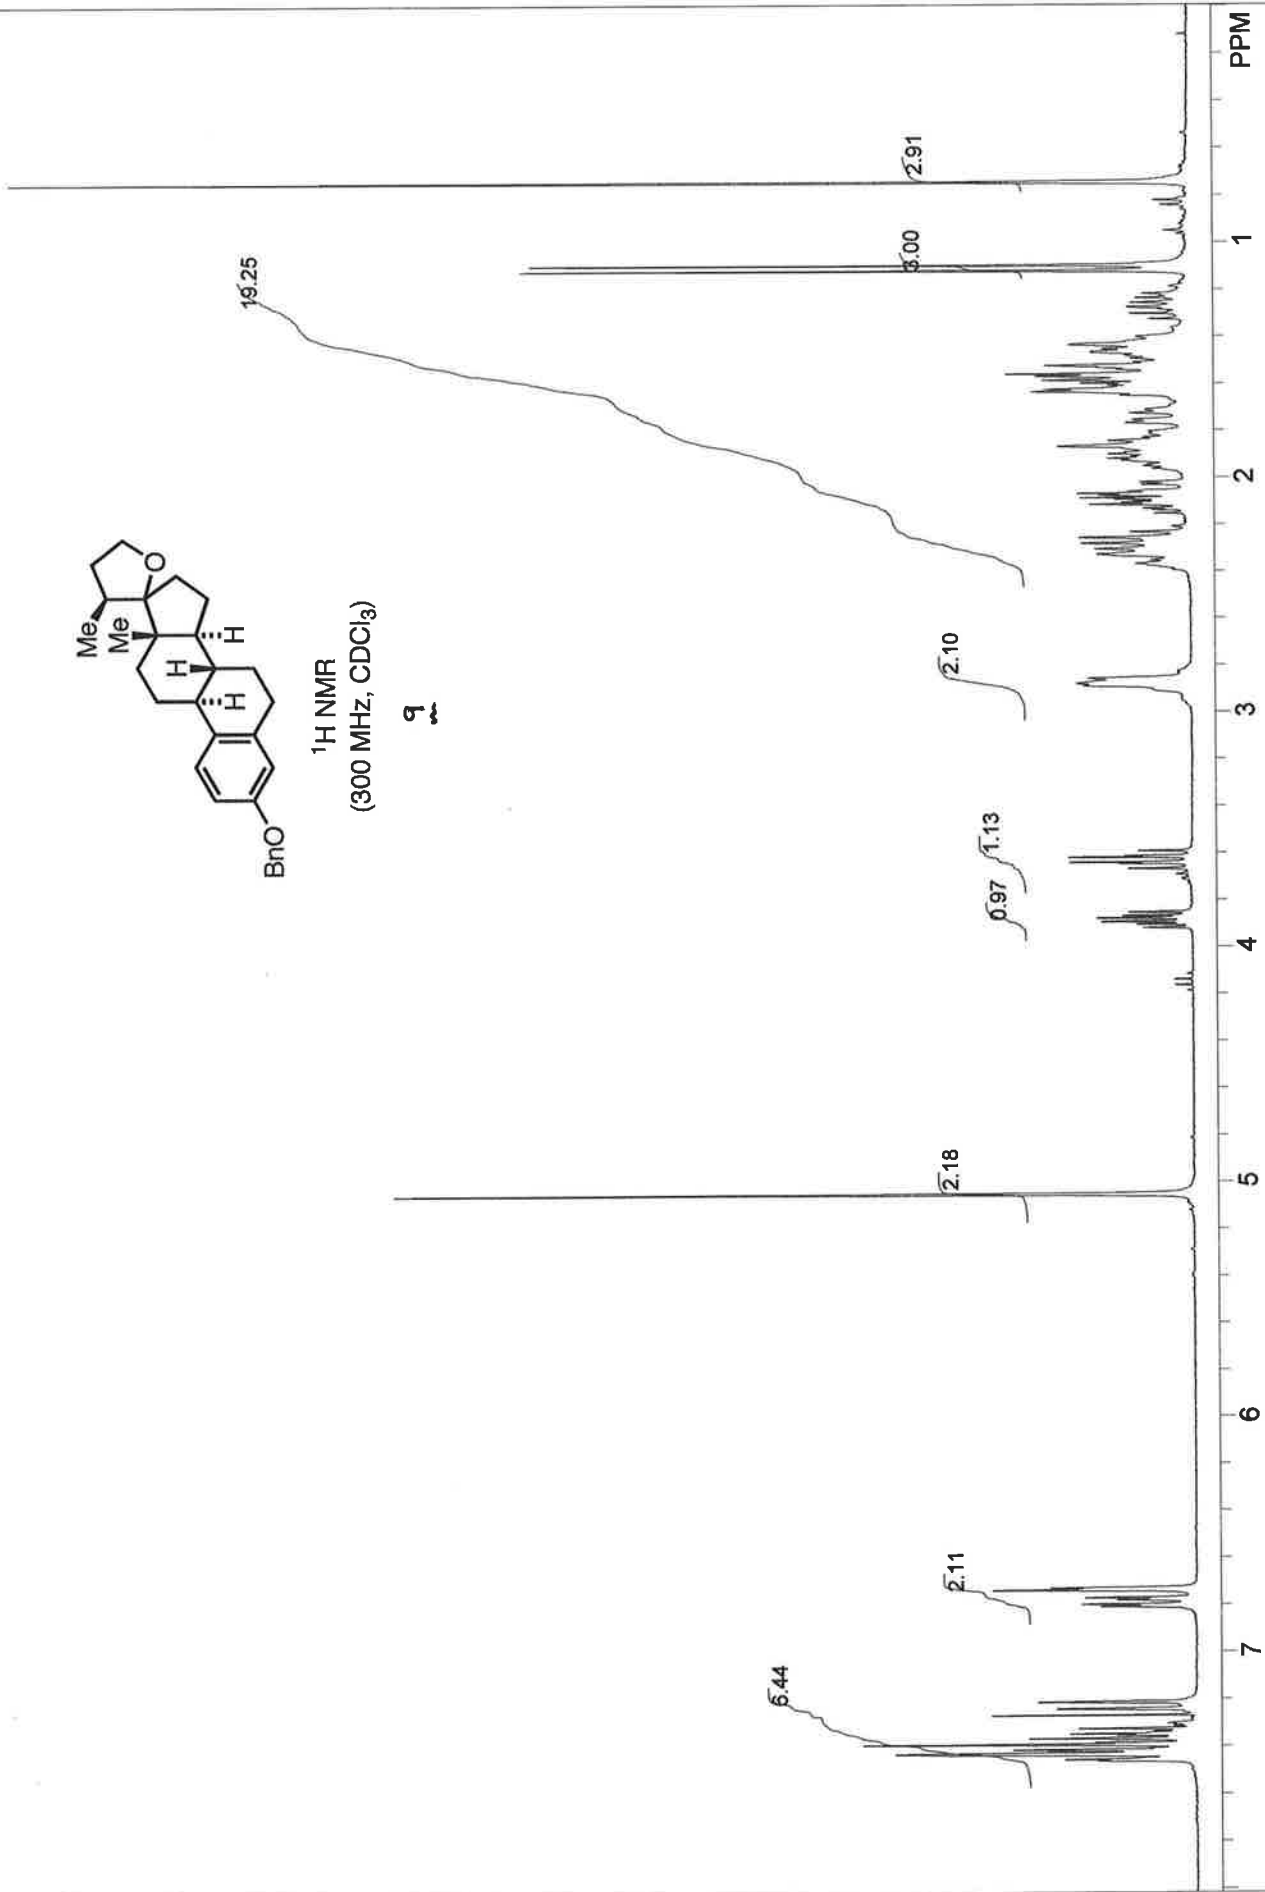

|                                 |             |                           |                       |
|---------------------------------|-------------|---------------------------|-----------------------|
| STANDARD 1H OBSERVE: blank line |             | USER: -- DATE: Aug 7 2002 |                       |
| F1: 300.151                     | F2: 75.480  | PTS1d: 14430              | 16384                 |
| EX: s2pul                       | PW: 6.0 us  | LB: 0.0                   | Nuts - \$zhcp194d.fid |
|                                 | PD: 1.0 sec | NA: 8                     |                       |
|                                 | OF1: 1806.9 |                           |                       |

156.071  
 137.852  
 136.978  
 133.045  
 128.245  
 127.550  
 126.035  
 114.590  
 112.032  
 95.765  
 77.649  
 77.230  
 76.811  
 70.192  
 66.195  
 50.186  
 48.433  
 44.211  
 39.565  
 37.131  
 35.318  
 31.527  
 31.195  
 30.574  
 28.326  
 26.794  
 23.783  
 19.257  
 16.043

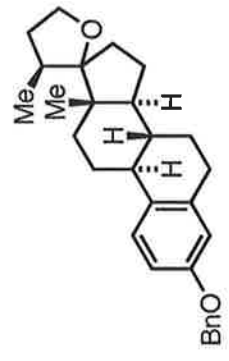

<sup>13</sup>C NMR  
 (75 MHz, CDCl<sub>3</sub>)

2

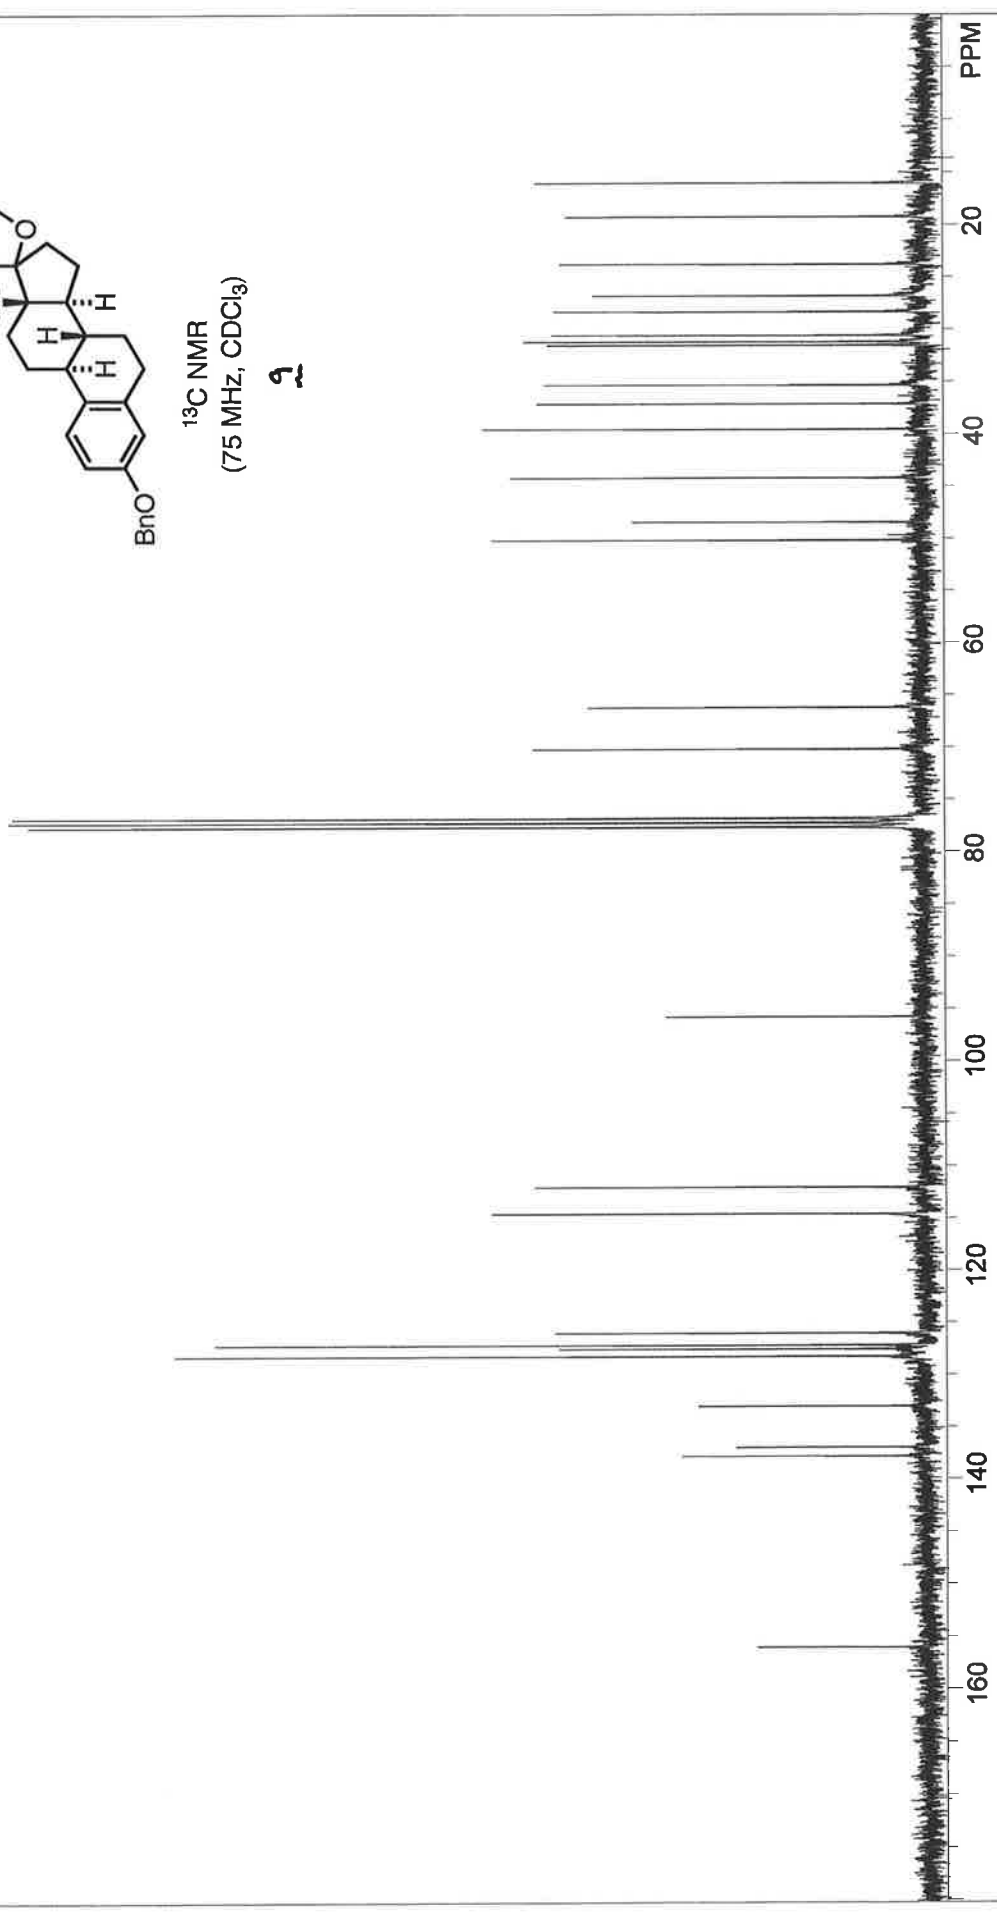

|             |             |                           |         |
|-------------|-------------|---------------------------|---------|
| :blank line |             | USER: -- DATE: Aug 7 2002 |         |
| F1: 75.481  | F2: 300.150 | PTS1d: 18868              | 32768   |
| EX: s2pul   |             | Nuts - \$CARBON.fid       |         |
|             |             | OF1: 8275.9               | LB: 1.0 |
|             |             | NA: 2000                  |         |
|             |             | PD: 1.0 sec               |         |
|             |             | PW: 7.3 us                |         |
|             |             | SW1: 18868                |         |

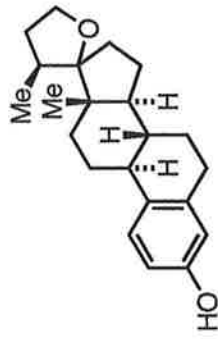

<sup>1</sup>H NMR  
(300 MHz, CDCl<sub>3</sub>)

10

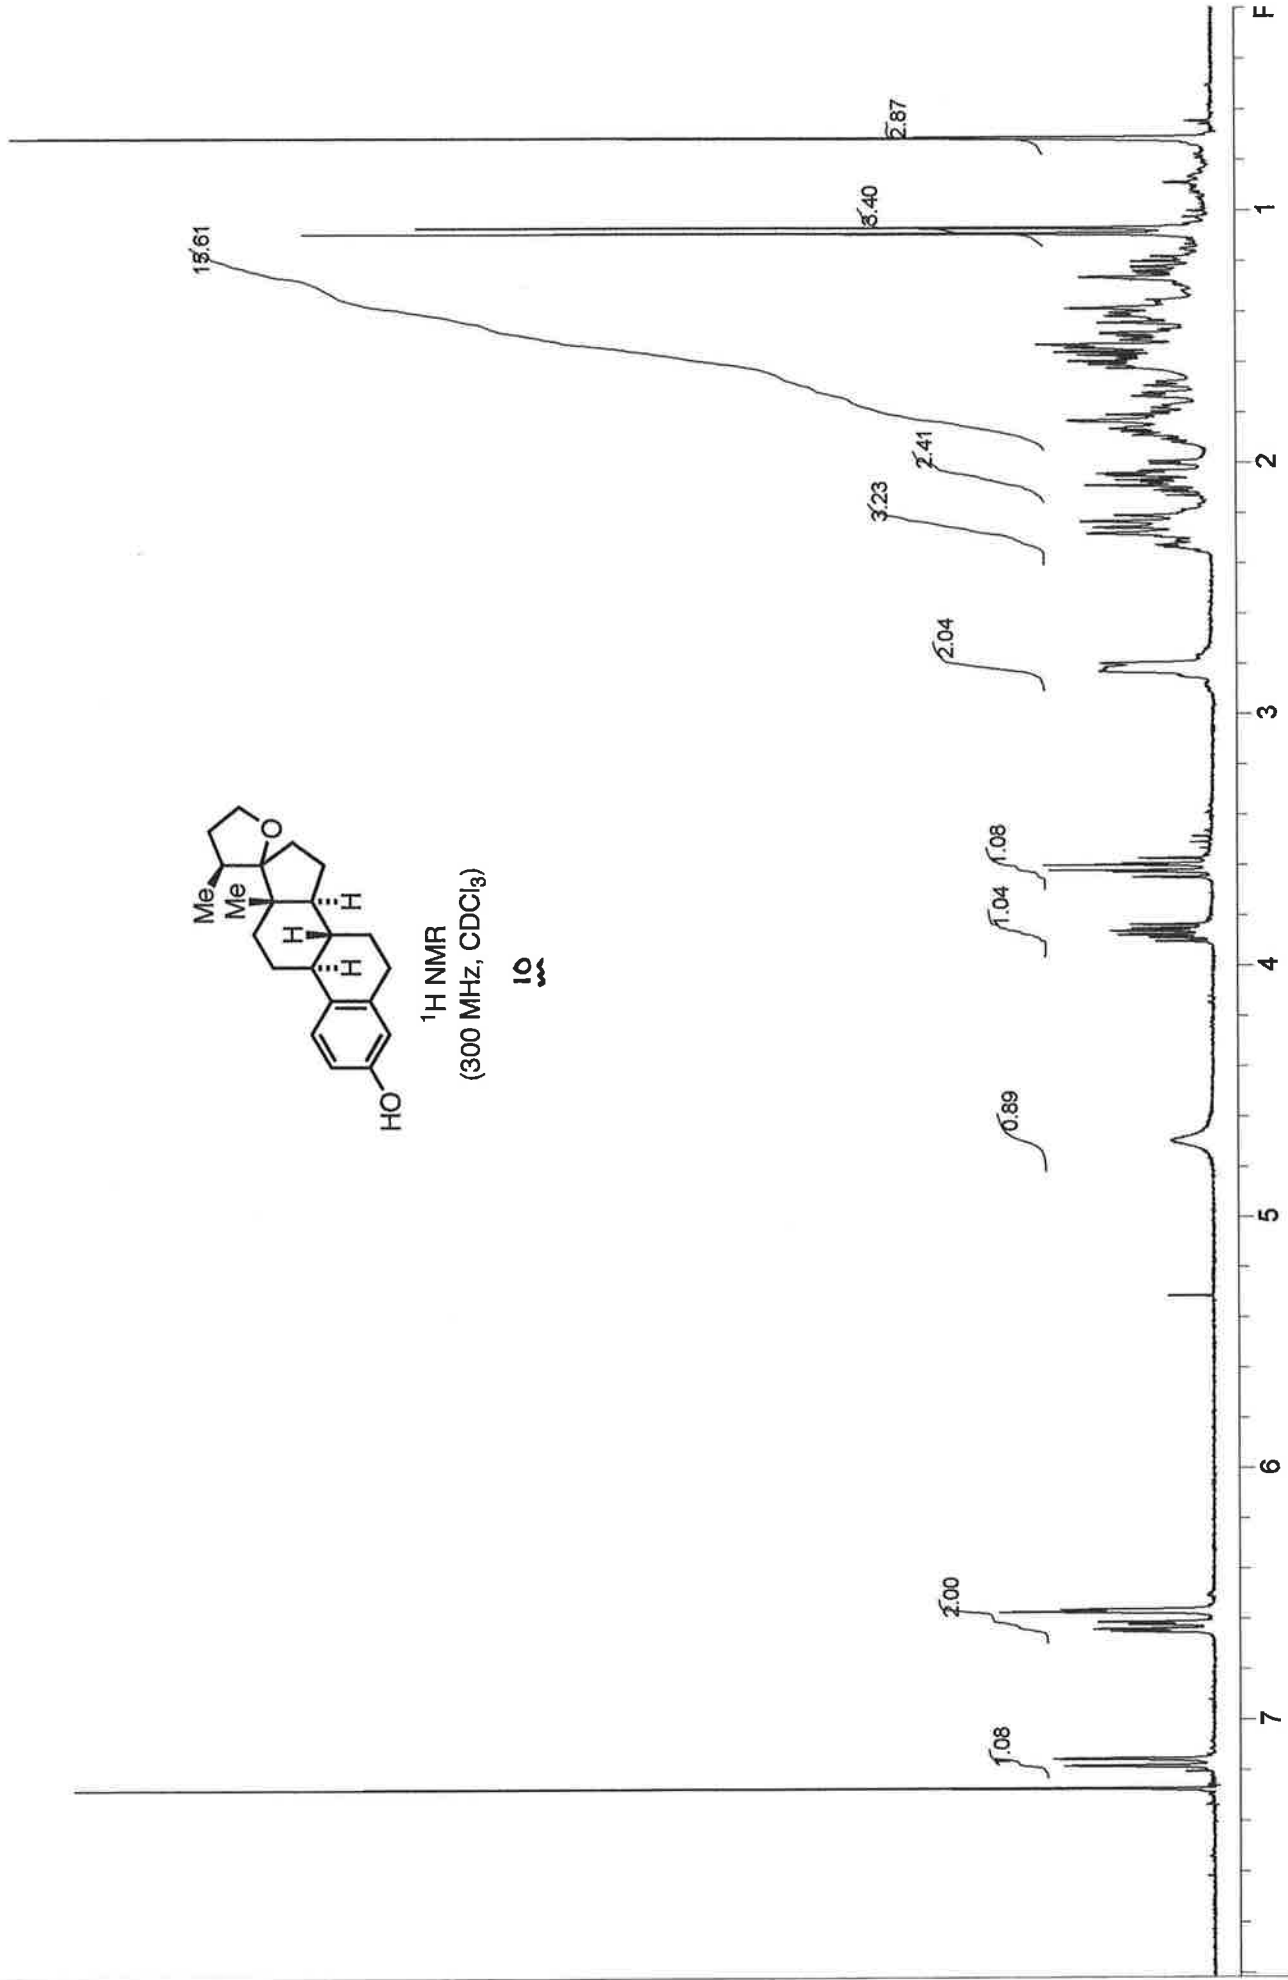

STANDARD 1H OBSERVE:blank line

F1: 300.142 F2: 75.478 SW1: 4803 OF1: 1803.0 PTS1d: 14409 USER: -- DATE: Feb 29 20

EX: s2pul PW: 6.0 us PD: 1.0 sec NA: 8 LB: 0.0 16384 Nuts - \$j1528a

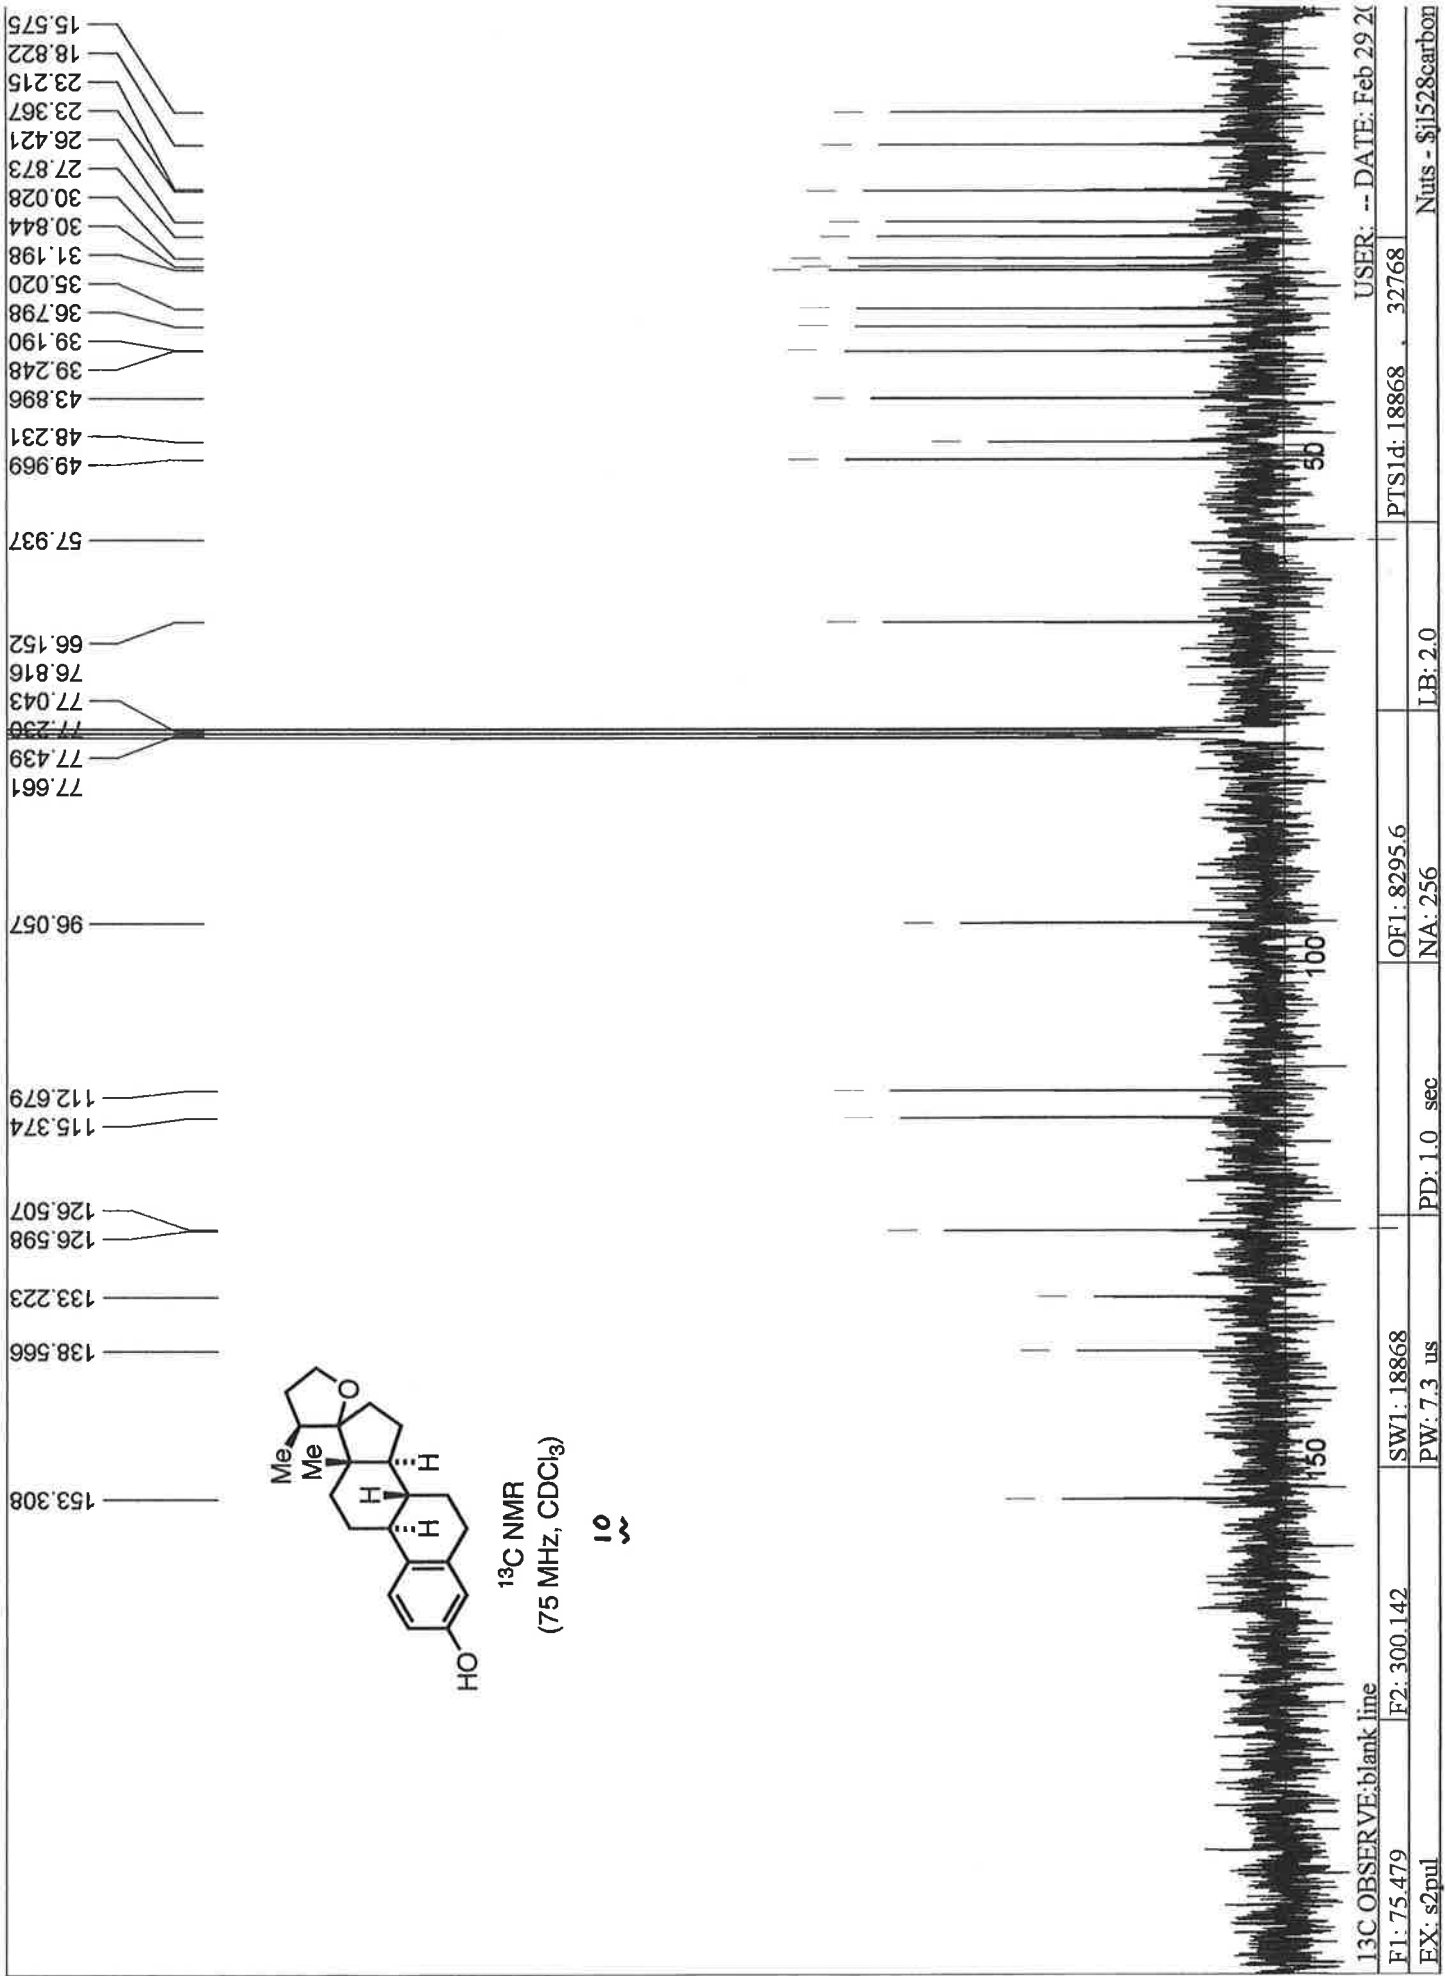

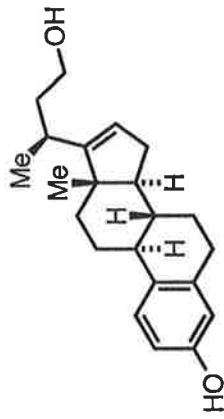

<sup>1</sup>H NMR  
(300 MHz, d<sub>6</sub>-acetone)

||  
~

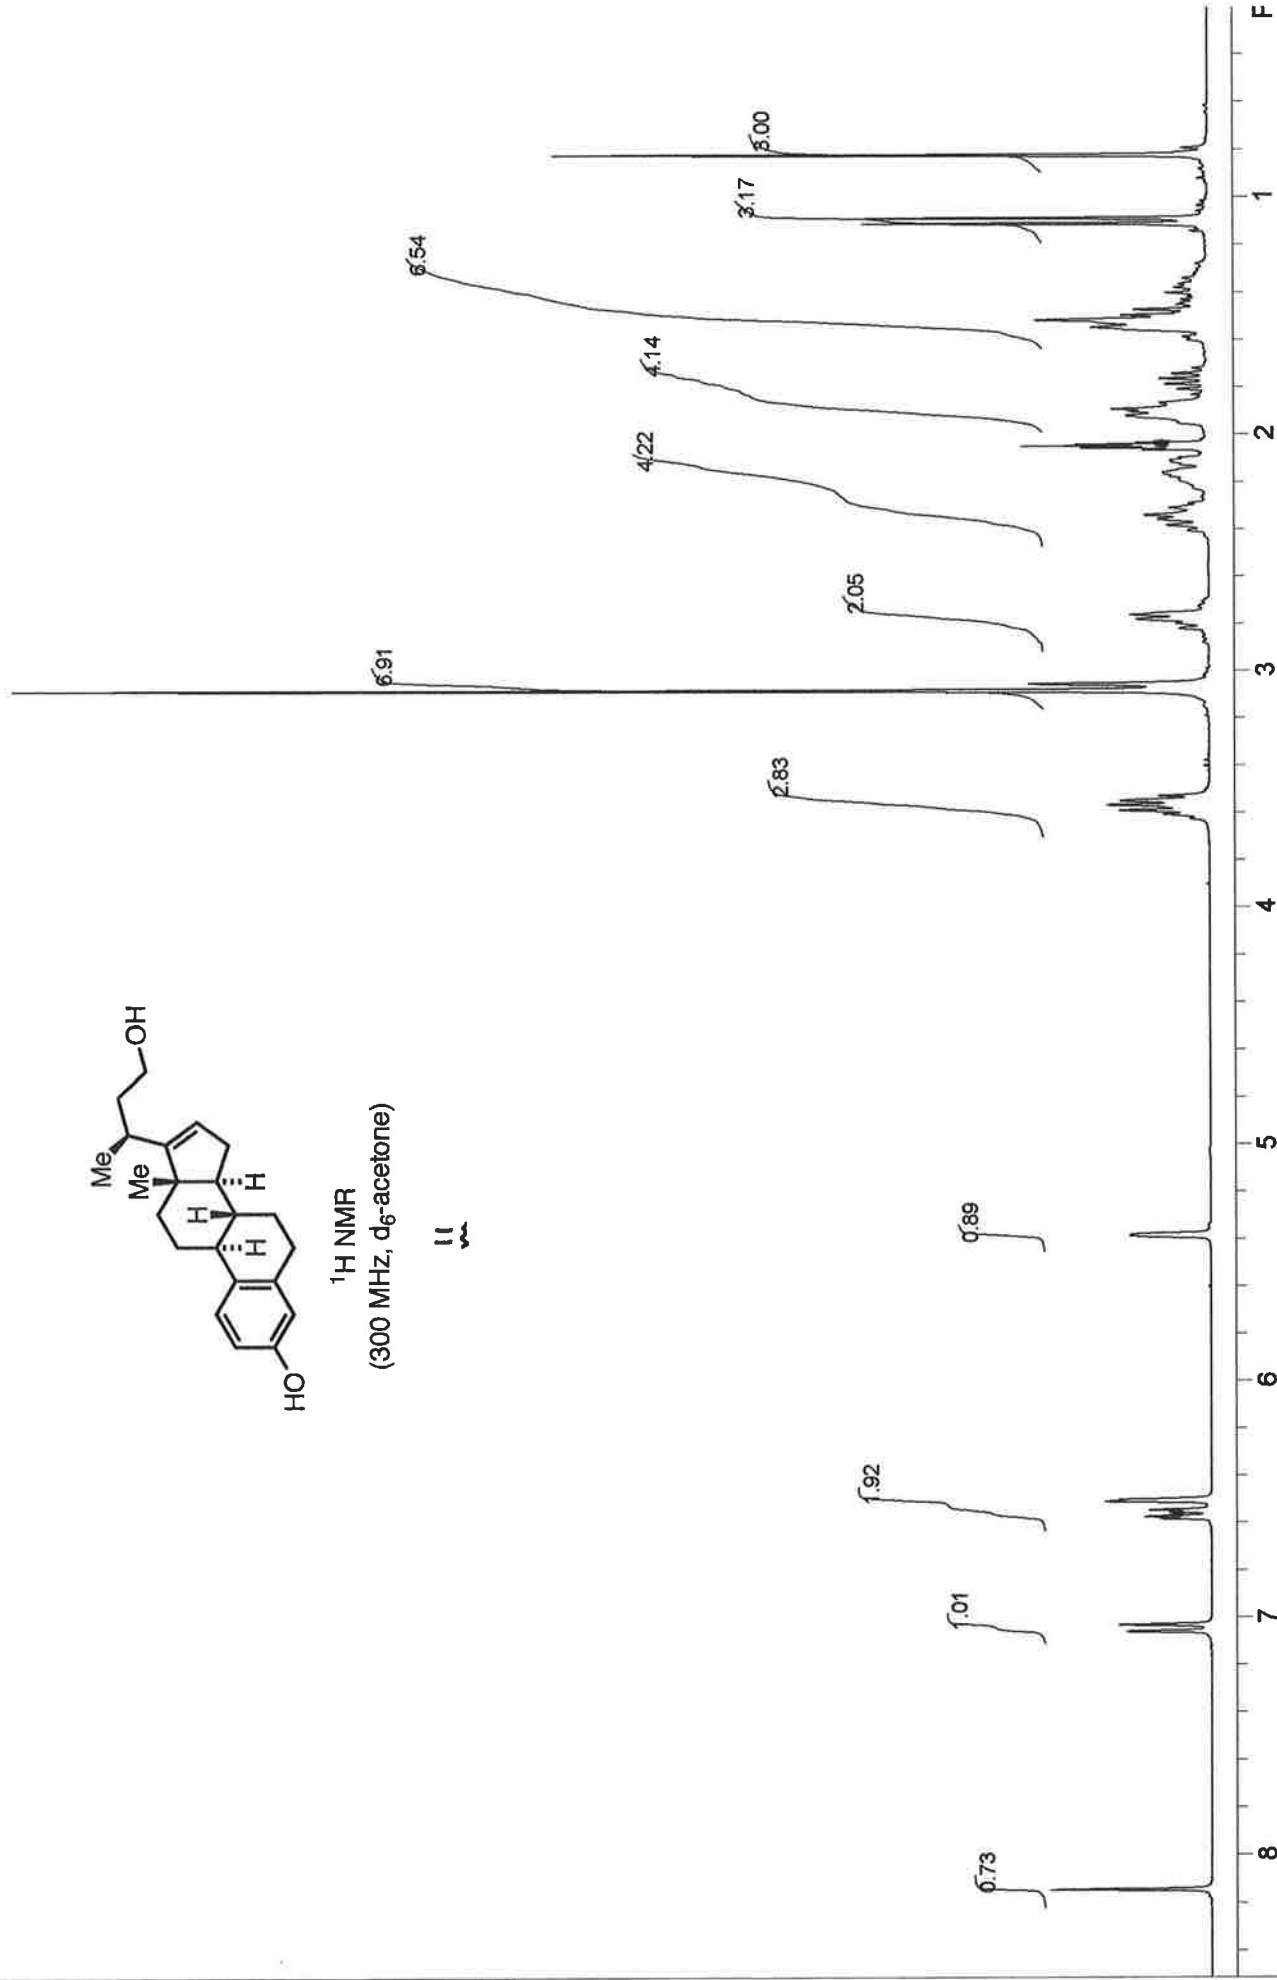

STANDARD 1H OBSERVE: blank line  
 F1: 300.152 F2: 75.480 SW1: 4810 OF1: 1795.3 PTS1d: 14430 . 16384 USER: -- DATE: Sep 23 20  
 EX: s2pul PD: 1.0 sec NA: 8 LB: 0.0 Nuts - \$zhep212

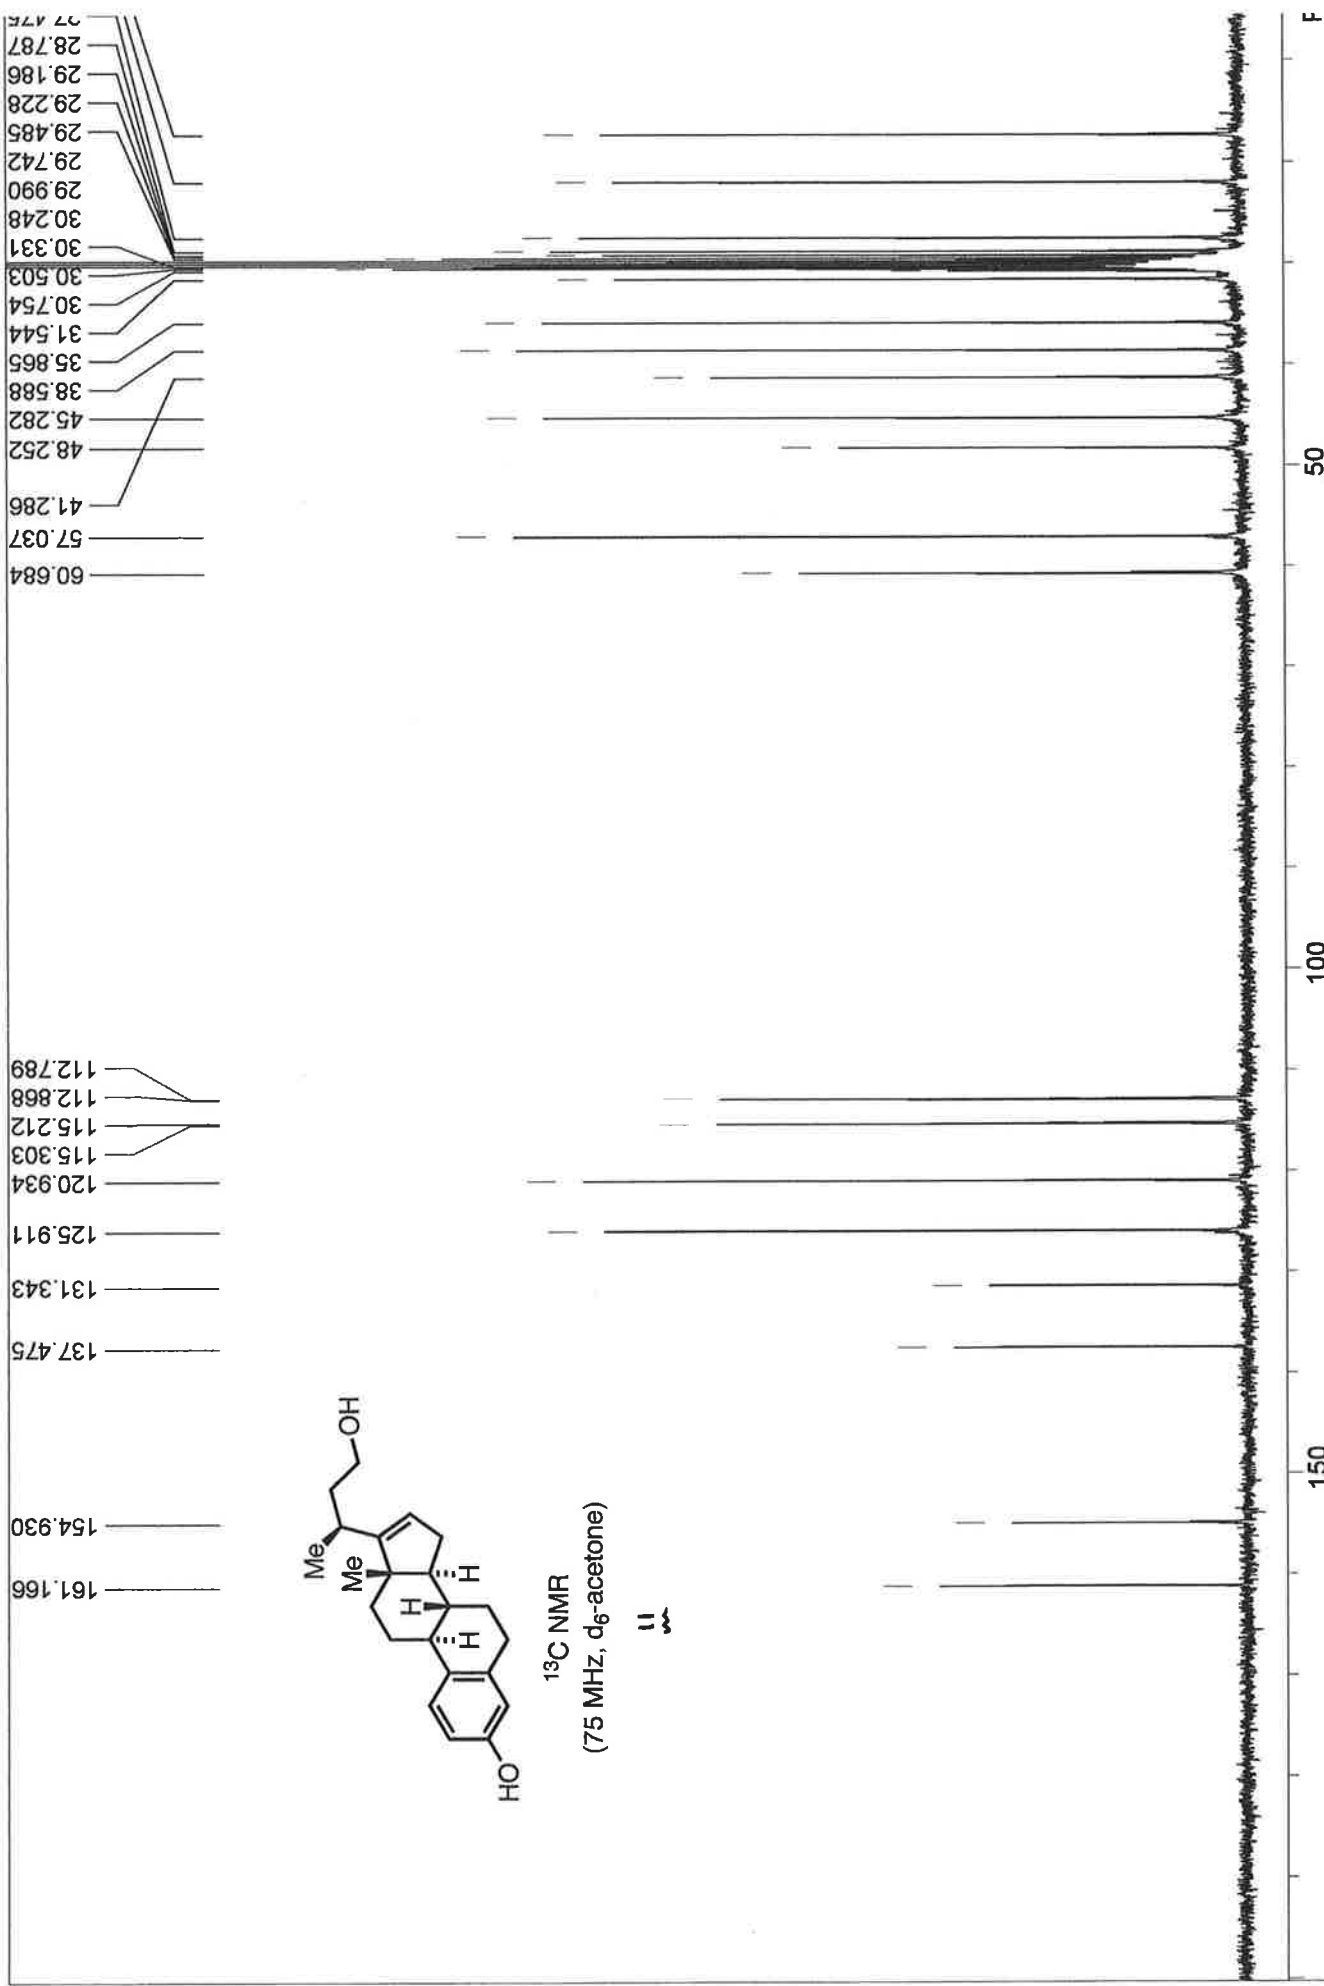

|             |             |                          |                 |
|-------------|-------------|--------------------------|-----------------|
| :blank line |             | USER: -- DATE: Sep 23 20 |                 |
| F1: 75.481  | F2: 300.152 | PTS1d: 18868             | 32768           |
| EX: s2pul   | PW: 7.3 us  | LB: 1.5                  | Nuts - \$CARBON |
| OF1: 8302.7 | NA: 5000    |                          |                 |

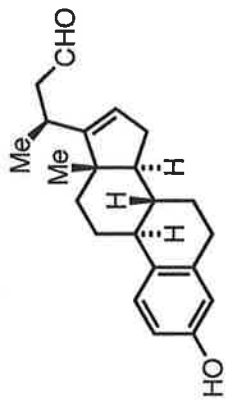

<sup>1</sup>H NMR  
(300 MHz, d<sub>6</sub>-acetone)

12

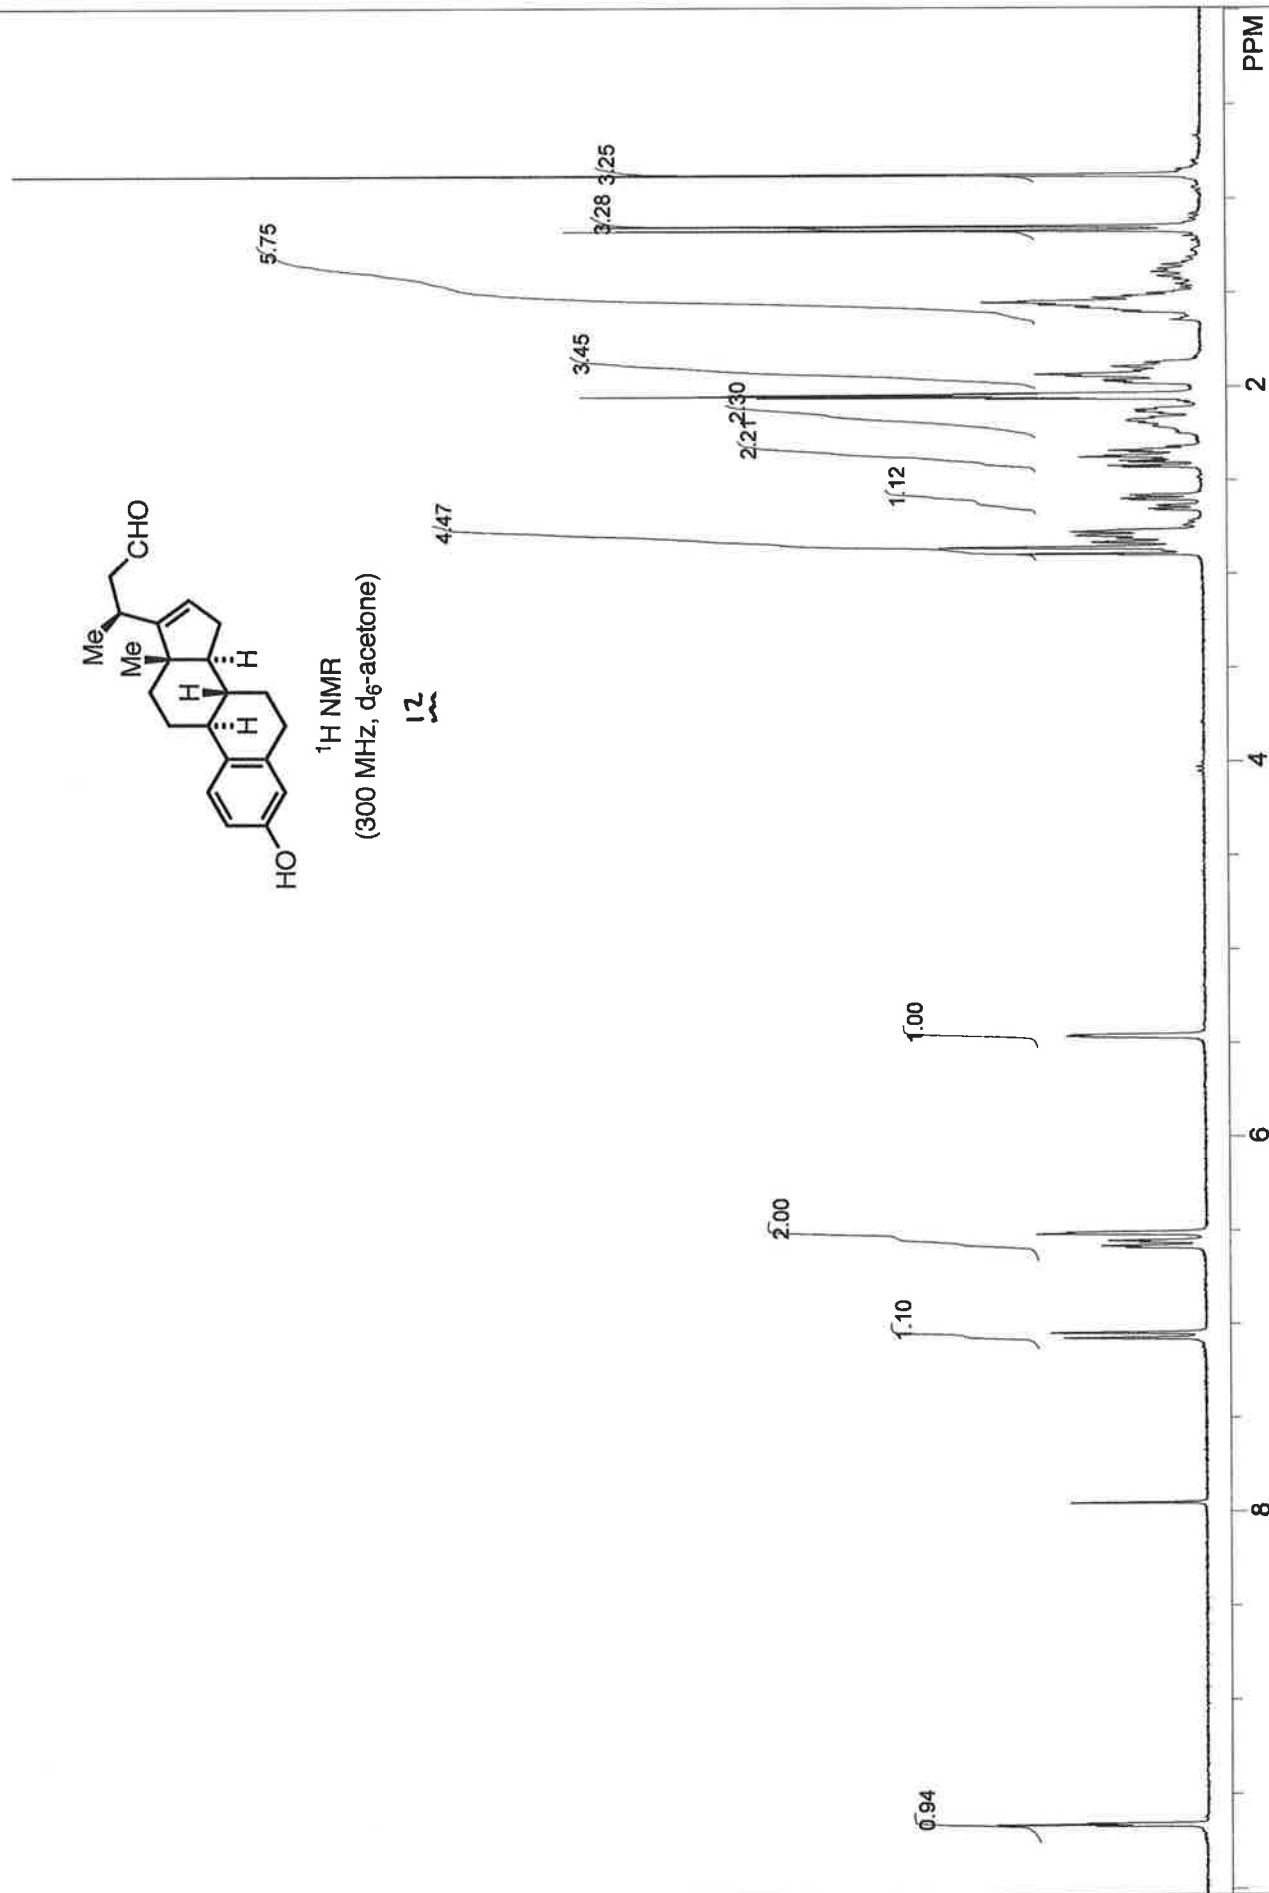

|                                |            |                            |                      |
|--------------------------------|------------|----------------------------|----------------------|
| STANDARD 1H OBSERVE:blank line |            | USER: -- DATE: Oct 31 2002 |                      |
| F1: 300.152                    | F2: 75.480 | PTS1d: 14430               | 16384                |
| EX: s2pul                      | PW: 6.0 us | PD: 1.0 sec                | NA: 8                |
|                                |            | OF1: 1795.4                | LB: 0.0              |
|                                |            |                            | Nuts - \$zhep235.fid |

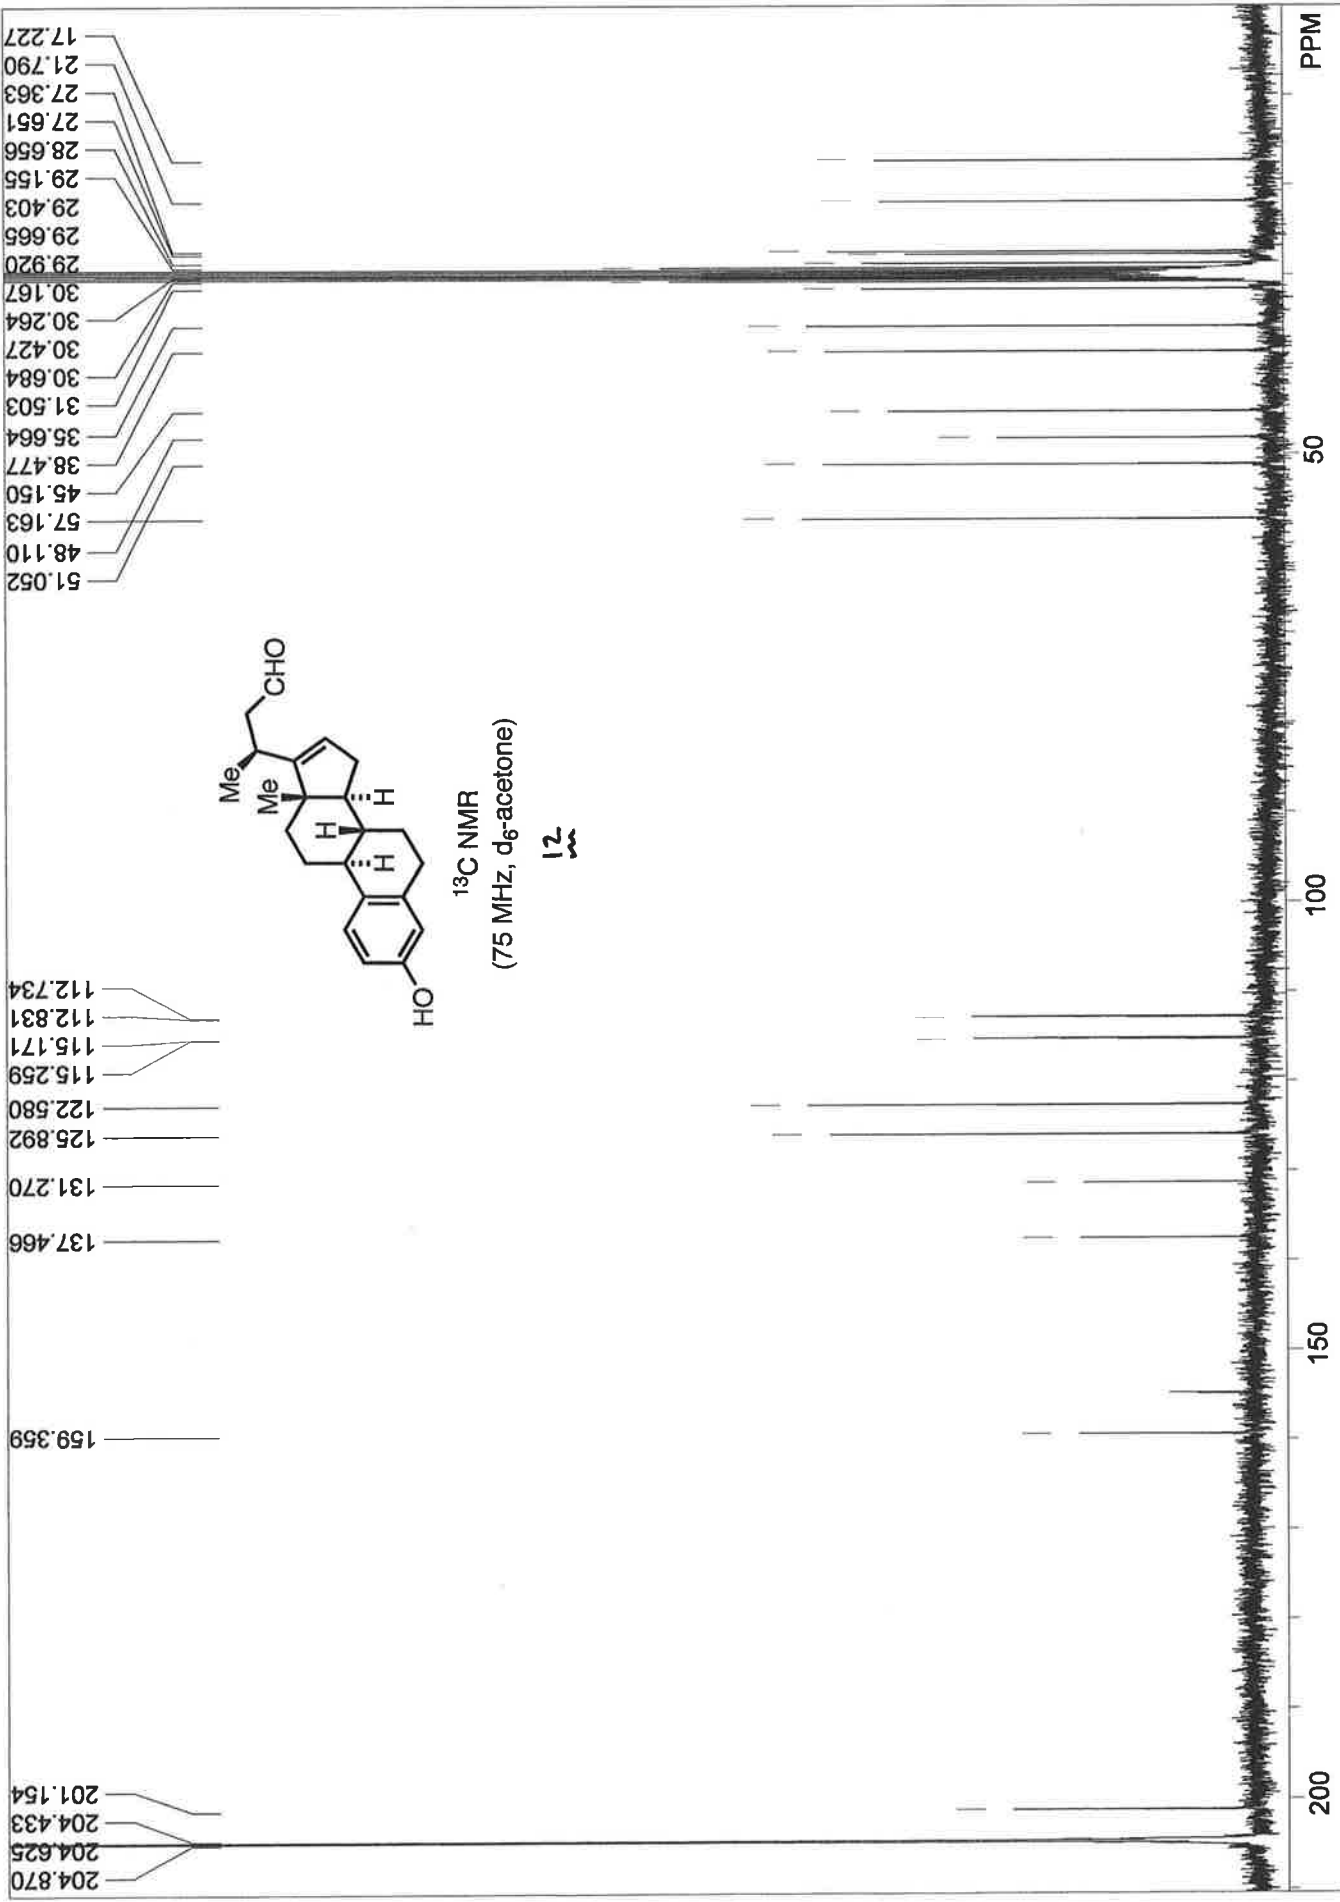

|             |             |                            |                     |
|-------------|-------------|----------------------------|---------------------|
| :blank line |             | USER: -- DATE: Oct 31 2002 |                     |
| F1: 75.481  | F2: 300.152 | PTS1d: 18868               | 32768               |
| EX: s2pul   | PW: 7.3 us  | LB: 1.0                    | Nuts - \$CARBON.fid |
|             | PD: 1.0 sec | OF1: 8300.1                | NA: 5000            |



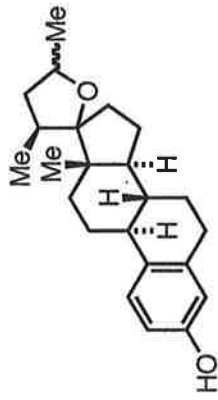

<sup>1</sup>H NMR  
(300 MHz, CDCl<sub>3</sub>)

13

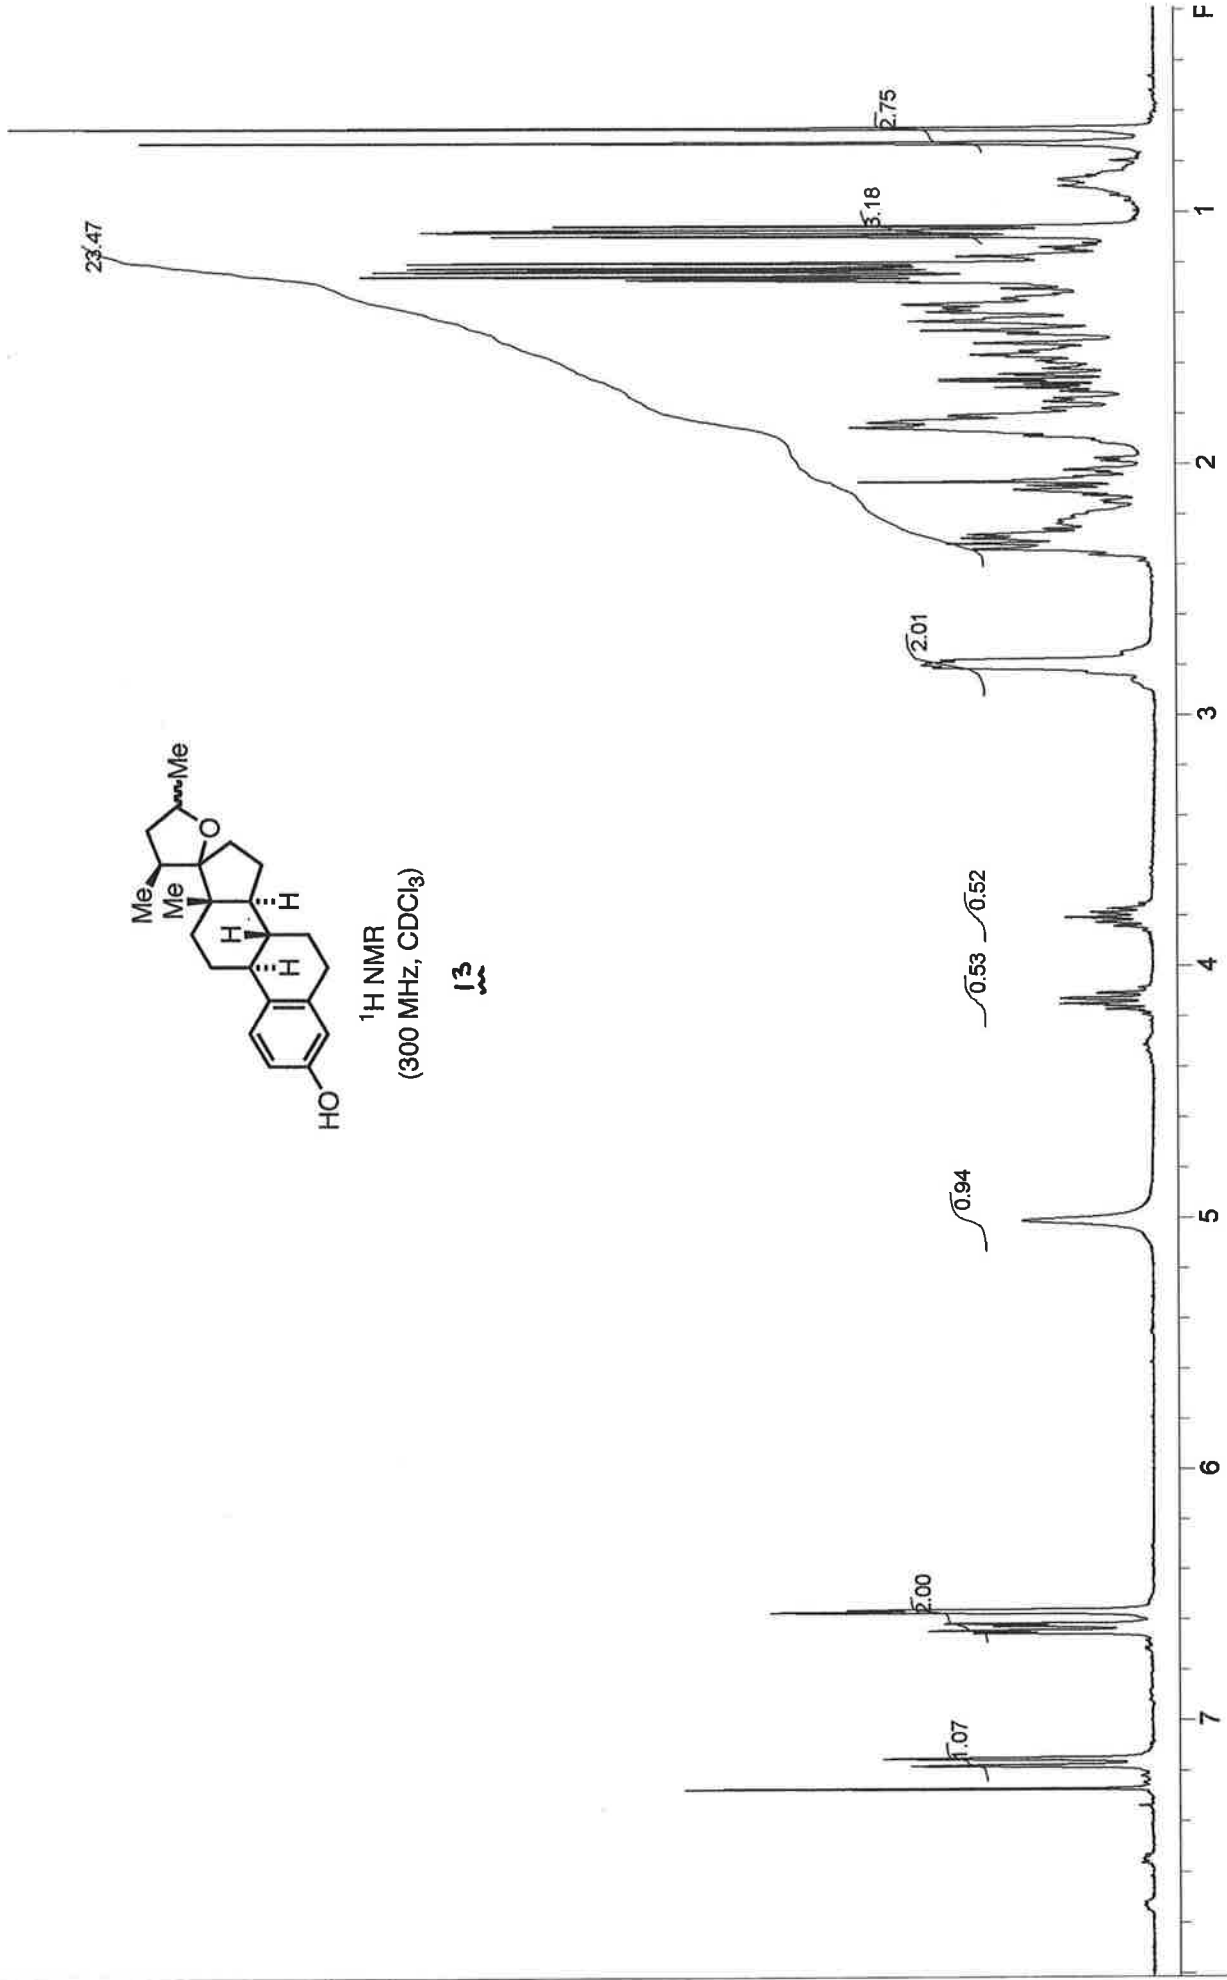

|                                 |             |                         |                |
|---------------------------------|-------------|-------------------------|----------------|
| STANDARD 1H OBSERVE: blank line |             | USER: -- DATE: Mar 3 20 |                |
| F1: 300.142                     | F2: 75.478  | PTS1d: 14409            | 16384          |
| EX: s2pul                       | PW: 6.0 us  | LB: 0.0                 | Nuts - \$j1529 |
|                                 | PD: 1.0 sec | OF1: 1802.7             |                |
|                                 | NA: 8       |                         |                |

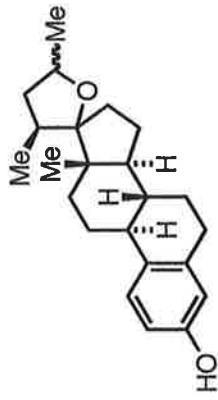

<sup>13</sup>C NMR  
(75 MHz, CDCl<sub>3</sub>)

13

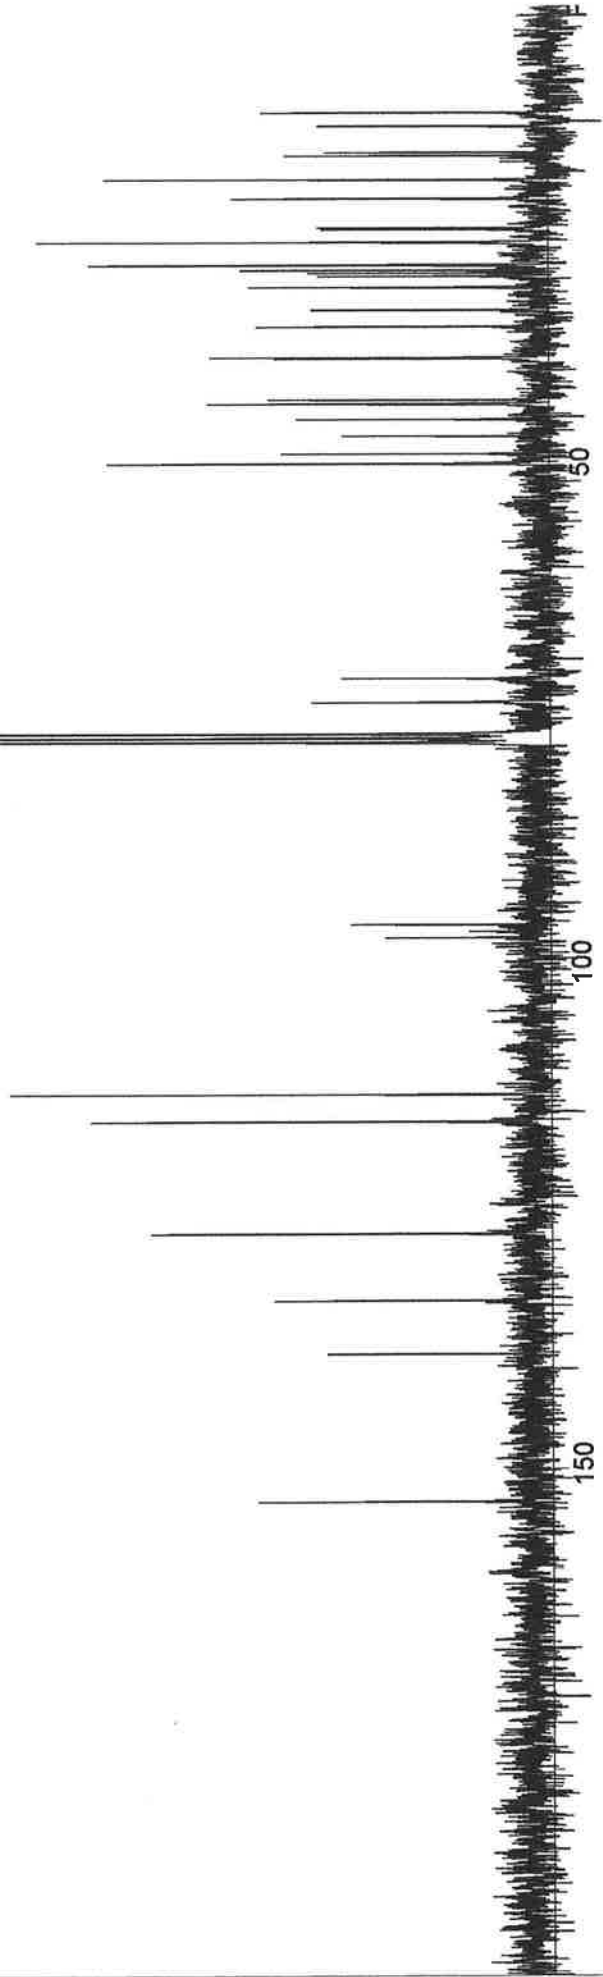

|                        |             |             |                         |
|------------------------|-------------|-------------|-------------------------|
| 13C.OBSERVE:blank line | OF1: 8293.9 | PTSD: 18868 | USER: -- DATE: Mar 3 20 |
| F1: 75.479             | NA: 256     | LB: 2.0     | 32768                   |
| EX: s2pul              | PD: 1.0 sec |             | Nuts - \$1529carbon     |

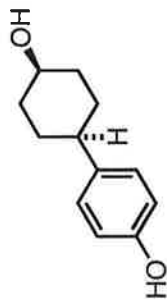

<sup>1</sup>H NMR  
(400 MHz, CD<sub>3</sub>OD)

14

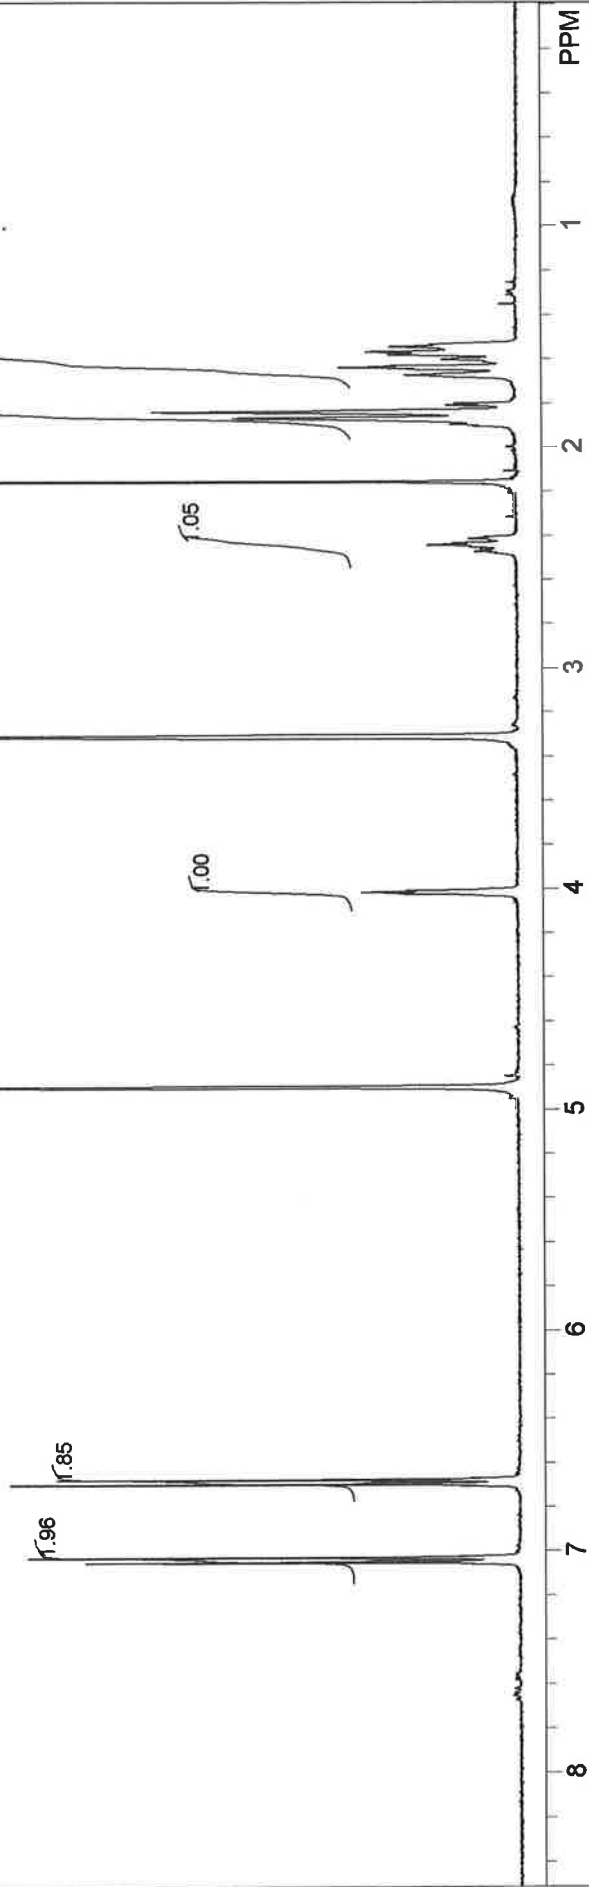

STANDARD 1H OBSERVE - profile

|             |             |            |            |              |       |                                |
|-------------|-------------|------------|------------|--------------|-------|--------------------------------|
| F1: 399.751 | F2: 100.526 | SW1: 6410  | OF1: 827.0 | PTS1d: 13132 | 16384 | USER: -- DATE: Feb 19 2007     |
| EX: s2pul   |             | PW: 7.7 us | NA: 8      | LB: 0.0      |       | Nuts - \$rkpl30-[F-F-minor.fid |

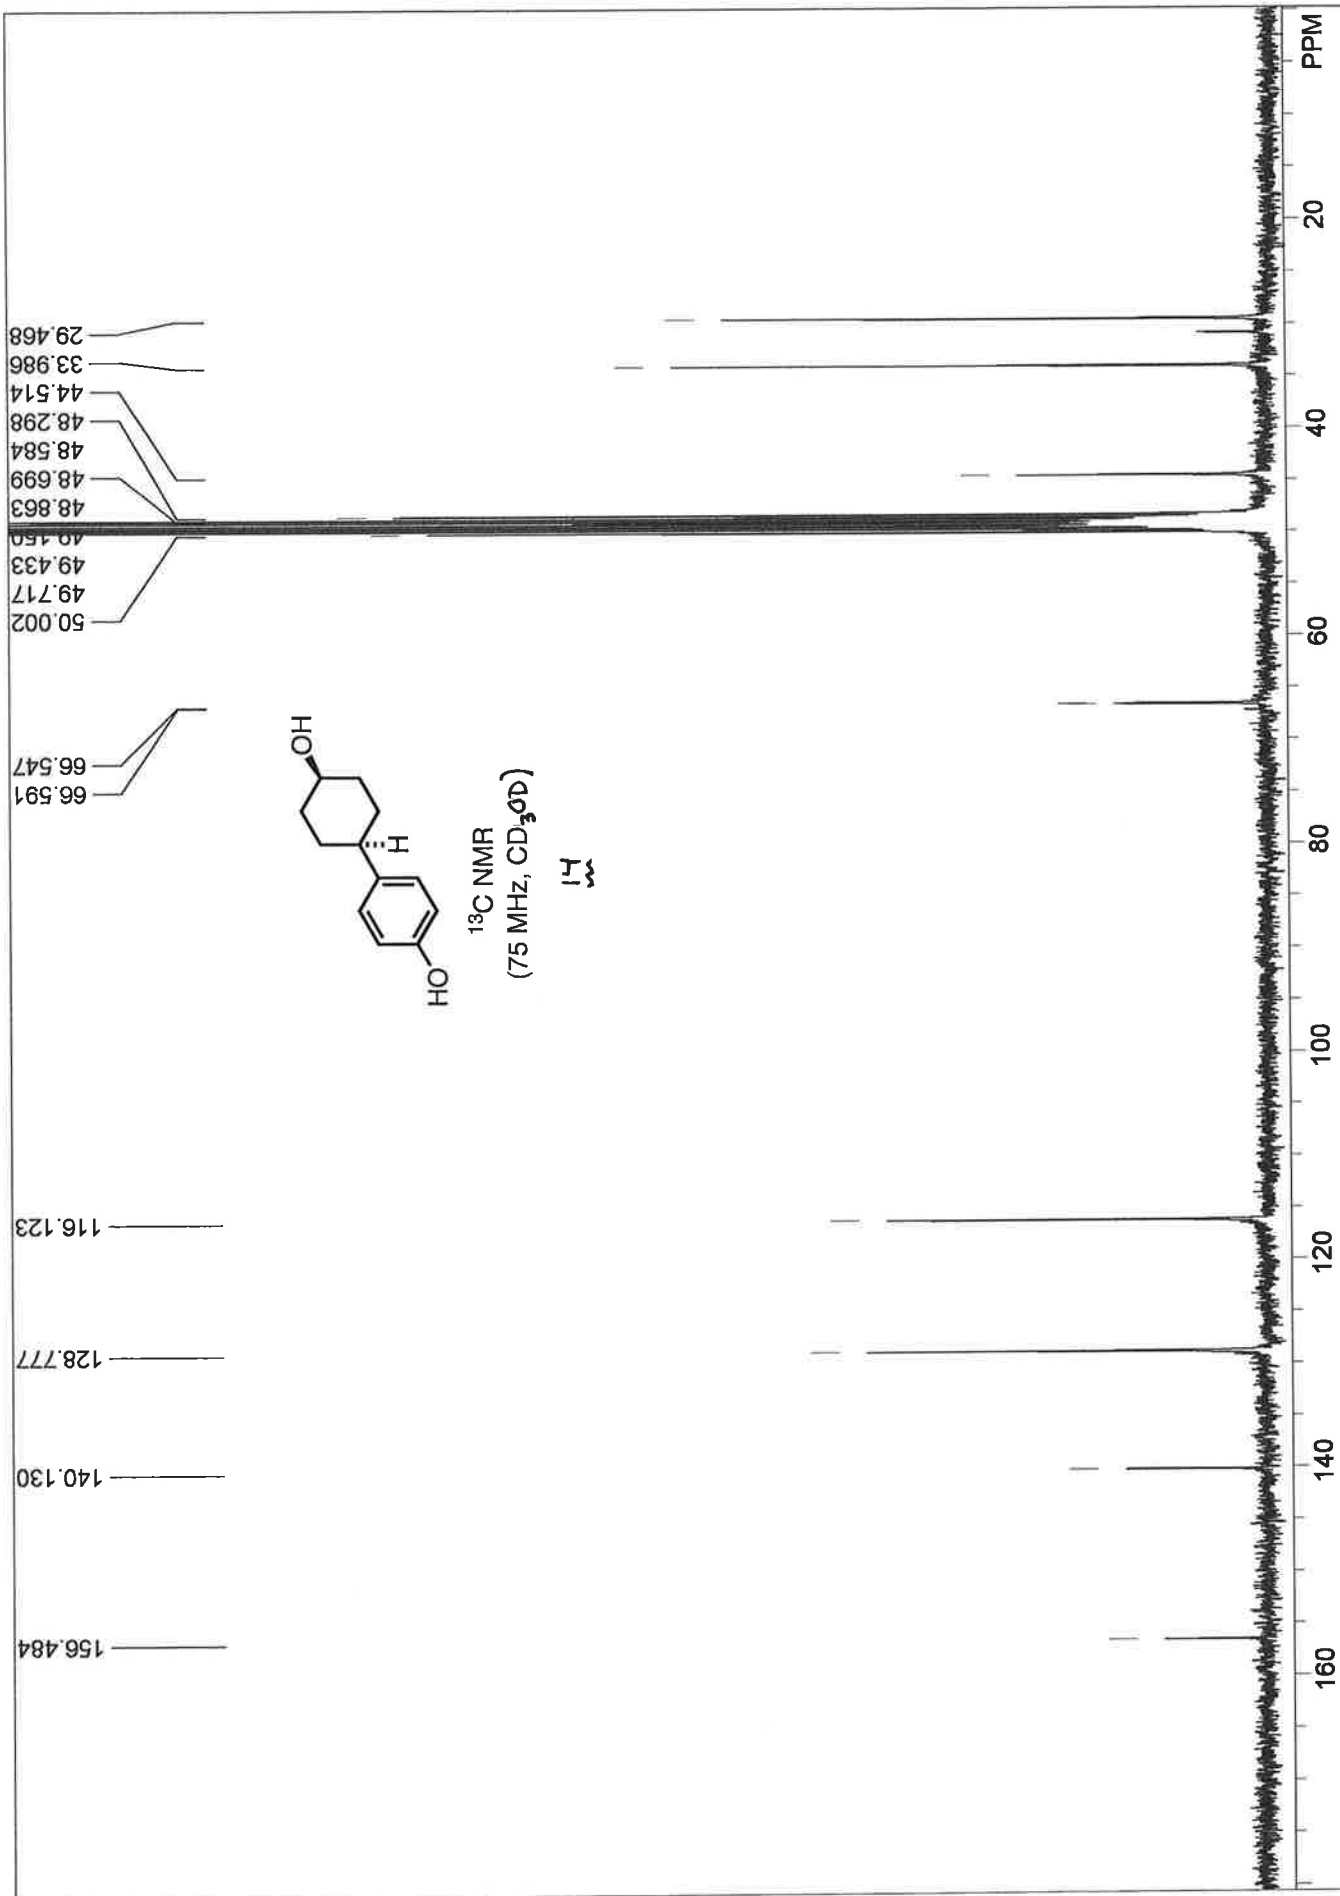

|                         |               |                            |          |
|-------------------------|---------------|----------------------------|----------|
| 13C OBSERVE: blank line |               | USER: -- DATE: Feb 19 2007 |          |
| F1: 75.477              | F2: 300.137   | PTS1d: 34246               | 65536    |
| EX: s2pul               | SW1: 18868    | NA: 64                     | Lib: 1.5 |
|                         | PW: 7.3 us    | PD: 1.0 sec                | NA: 64   |
|                         | OF1: 8402.5   | NA: 64                     | NA: 64   |
|                         | OF2: 8402.5   | NA: 64                     | NA: 64   |
|                         | OF3: 8402.5   | NA: 64                     | NA: 64   |
|                         | OF4: 8402.5   | NA: 64                     | NA: 64   |
|                         | OF5: 8402.5   | NA: 64                     | NA: 64   |
|                         | OF6: 8402.5   | NA: 64                     | NA: 64   |
|                         | OF7: 8402.5   | NA: 64                     | NA: 64   |
|                         | OF8: 8402.5   | NA: 64                     | NA: 64   |
|                         | OF9: 8402.5   | NA: 64                     | NA: 64   |
|                         | OF10: 8402.5  | NA: 64                     | NA: 64   |
|                         | OF11: 8402.5  | NA: 64                     | NA: 64   |
|                         | OF12: 8402.5  | NA: 64                     | NA: 64   |
|                         | OF13: 8402.5  | NA: 64                     | NA: 64   |
|                         | OF14: 8402.5  | NA: 64                     | NA: 64   |
|                         | OF15: 8402.5  | NA: 64                     | NA: 64   |
|                         | OF16: 8402.5  | NA: 64                     | NA: 64   |
|                         | OF17: 8402.5  | NA: 64                     | NA: 64   |
|                         | OF18: 8402.5  | NA: 64                     | NA: 64   |
|                         | OF19: 8402.5  | NA: 64                     | NA: 64   |
|                         | OF20: 8402.5  | NA: 64                     | NA: 64   |
|                         | OF21: 8402.5  | NA: 64                     | NA: 64   |
|                         | OF22: 8402.5  | NA: 64                     | NA: 64   |
|                         | OF23: 8402.5  | NA: 64                     | NA: 64   |
|                         | OF24: 8402.5  | NA: 64                     | NA: 64   |
|                         | OF25: 8402.5  | NA: 64                     | NA: 64   |
|                         | OF26: 8402.5  | NA: 64                     | NA: 64   |
|                         | OF27: 8402.5  | NA: 64                     | NA: 64   |
|                         | OF28: 8402.5  | NA: 64                     | NA: 64   |
|                         | OF29: 8402.5  | NA: 64                     | NA: 64   |
|                         | OF30: 8402.5  | NA: 64                     | NA: 64   |
|                         | OF31: 8402.5  | NA: 64                     | NA: 64   |
|                         | OF32: 8402.5  | NA: 64                     | NA: 64   |
|                         | OF33: 8402.5  | NA: 64                     | NA: 64   |
|                         | OF34: 8402.5  | NA: 64                     | NA: 64   |
|                         | OF35: 8402.5  | NA: 64                     | NA: 64   |
|                         | OF36: 8402.5  | NA: 64                     | NA: 64   |
|                         | OF37: 8402.5  | NA: 64                     | NA: 64   |
|                         | OF38: 8402.5  | NA: 64                     | NA: 64   |
|                         | OF39: 8402.5  | NA: 64                     | NA: 64   |
|                         | OF40: 8402.5  | NA: 64                     | NA: 64   |
|                         | OF41: 8402.5  | NA: 64                     | NA: 64   |
|                         | OF42: 8402.5  | NA: 64                     | NA: 64   |
|                         | OF43: 8402.5  | NA: 64                     | NA: 64   |
|                         | OF44: 8402.5  | NA: 64                     | NA: 64   |
|                         | OF45: 8402.5  | NA: 64                     | NA: 64   |
|                         | OF46: 8402.5  | NA: 64                     | NA: 64   |
|                         | OF47: 8402.5  | NA: 64                     | NA: 64   |
|                         | OF48: 8402.5  | NA: 64                     | NA: 64   |
|                         | OF49: 8402.5  | NA: 64                     | NA: 64   |
|                         | OF50: 8402.5  | NA: 64                     | NA: 64   |
|                         | OF51: 8402.5  | NA: 64                     | NA: 64   |
|                         | OF52: 8402.5  | NA: 64                     | NA: 64   |
|                         | OF53: 8402.5  | NA: 64                     | NA: 64   |
|                         | OF54: 8402.5  | NA: 64                     | NA: 64   |
|                         | OF55: 8402.5  | NA: 64                     | NA: 64   |
|                         | OF56: 8402.5  | NA: 64                     | NA: 64   |
|                         | OF57: 8402.5  | NA: 64                     | NA: 64   |
|                         | OF58: 8402.5  | NA: 64                     | NA: 64   |
|                         | OF59: 8402.5  | NA: 64                     | NA: 64   |
|                         | OF60: 8402.5  | NA: 64                     | NA: 64   |
|                         | OF61: 8402.5  | NA: 64                     | NA: 64   |
|                         | OF62: 8402.5  | NA: 64                     | NA: 64   |
|                         | OF63: 8402.5  | NA: 64                     | NA: 64   |
|                         | OF64: 8402.5  | NA: 64                     | NA: 64   |
|                         | OF65: 8402.5  | NA: 64                     | NA: 64   |
|                         | OF66: 8402.5  | NA: 64                     | NA: 64   |
|                         | OF67: 8402.5  | NA: 64                     | NA: 64   |
|                         | OF68: 8402.5  | NA: 64                     | NA: 64   |
|                         | OF69: 8402.5  | NA: 64                     | NA: 64   |
|                         | OF70: 8402.5  | NA: 64                     | NA: 64   |
|                         | OF71: 8402.5  | NA: 64                     | NA: 64   |
|                         | OF72: 8402.5  | NA: 64                     | NA: 64   |
|                         | OF73: 8402.5  | NA: 64                     | NA: 64   |
|                         | OF74: 8402.5  | NA: 64                     | NA: 64   |
|                         | OF75: 8402.5  | NA: 64                     | NA: 64   |
|                         | OF76: 8402.5  | NA: 64                     | NA: 64   |
|                         | OF77: 8402.5  | NA: 64                     | NA: 64   |
|                         | OF78: 8402.5  | NA: 64                     | NA: 64   |
|                         | OF79: 8402.5  | NA: 64                     | NA: 64   |
|                         | OF80: 8402.5  | NA: 64                     | NA: 64   |
|                         | OF81: 8402.5  | NA: 64                     | NA: 64   |
|                         | OF82: 8402.5  | NA: 64                     | NA: 64   |
|                         | OF83: 8402.5  | NA: 64                     | NA: 64   |
|                         | OF84: 8402.5  | NA: 64                     | NA: 64   |
|                         | OF85: 8402.5  | NA: 64                     | NA: 64   |
|                         | OF86: 8402.5  | NA: 64                     | NA: 64   |
|                         | OF87: 8402.5  | NA: 64                     | NA: 64   |
|                         | OF88: 8402.5  | NA: 64                     | NA: 64   |
|                         | OF89: 8402.5  | NA: 64                     | NA: 64   |
|                         | OF90: 8402.5  | NA: 64                     | NA: 64   |
|                         | OF91: 8402.5  | NA: 64                     | NA: 64   |
|                         | OF92: 8402.5  | NA: 64                     | NA: 64   |
|                         | OF93: 8402.5  | NA: 64                     | NA: 64   |
|                         | OF94: 8402.5  | NA: 64                     | NA: 64   |
|                         | OF95: 8402.5  | NA: 64                     | NA: 64   |
|                         | OF96: 8402.5  | NA: 64                     | NA: 64   |
|                         | OF97: 8402.5  | NA: 64                     | NA: 64   |
|                         | OF98: 8402.5  | NA: 64                     | NA: 64   |
|                         | OF99: 8402.5  | NA: 64                     | NA: 64   |
|                         | OF100: 8402.5 | NA: 64                     | NA: 64   |

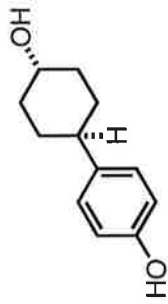

<sup>1</sup>H NMR  
(400 MHz, CD<sub>3</sub>OD)

15

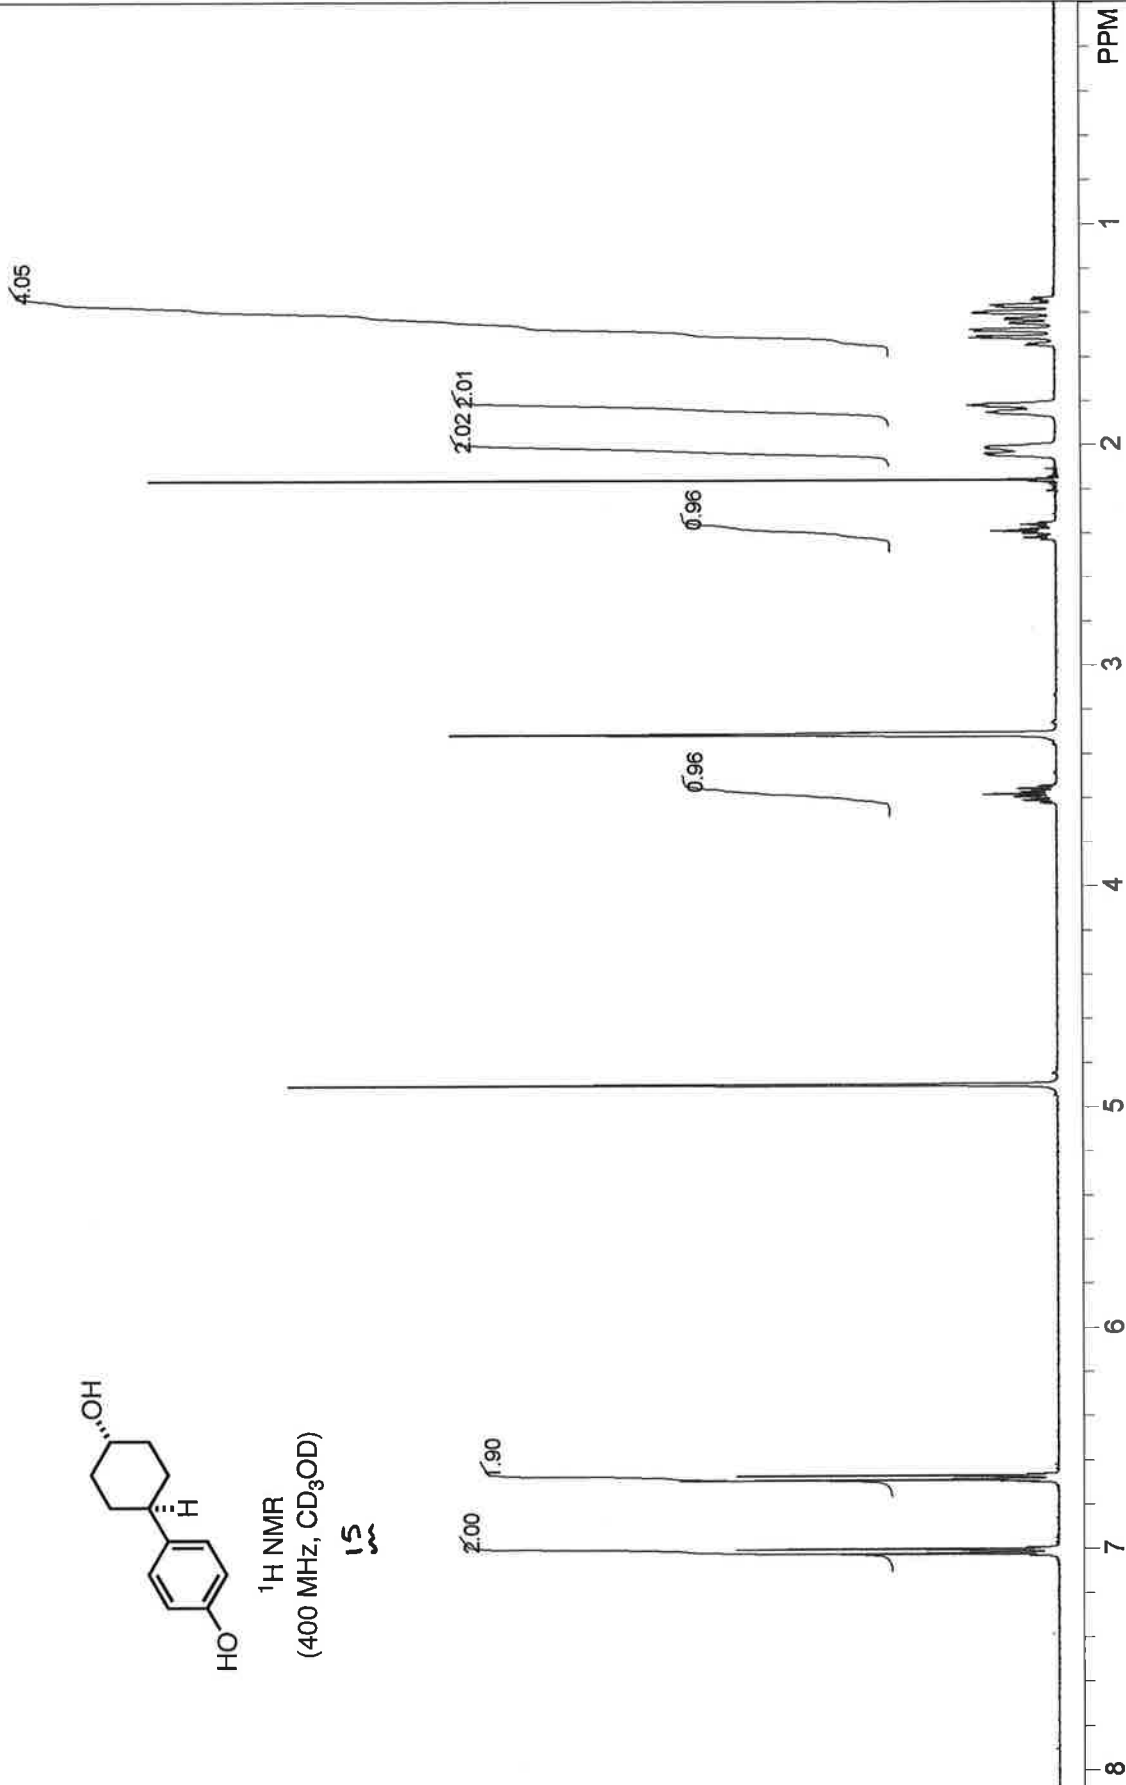

STANDARD 1H OBSERVE - profile

USER: -- DATE: Feb 19 2007

F1: 399.753 F2: 100.527

OF1: 2402.0

PTSId: 13132 16384

EX: s2pul

PW: 7.7 us

PD: 1.0 sec

NA: 8

LB: 0.0

Nuts - \$rkp130-II-F-major.fid

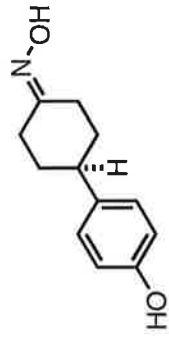

<sup>1</sup>H NMR  
(400 MHz, CD<sub>3</sub>OD)

1b

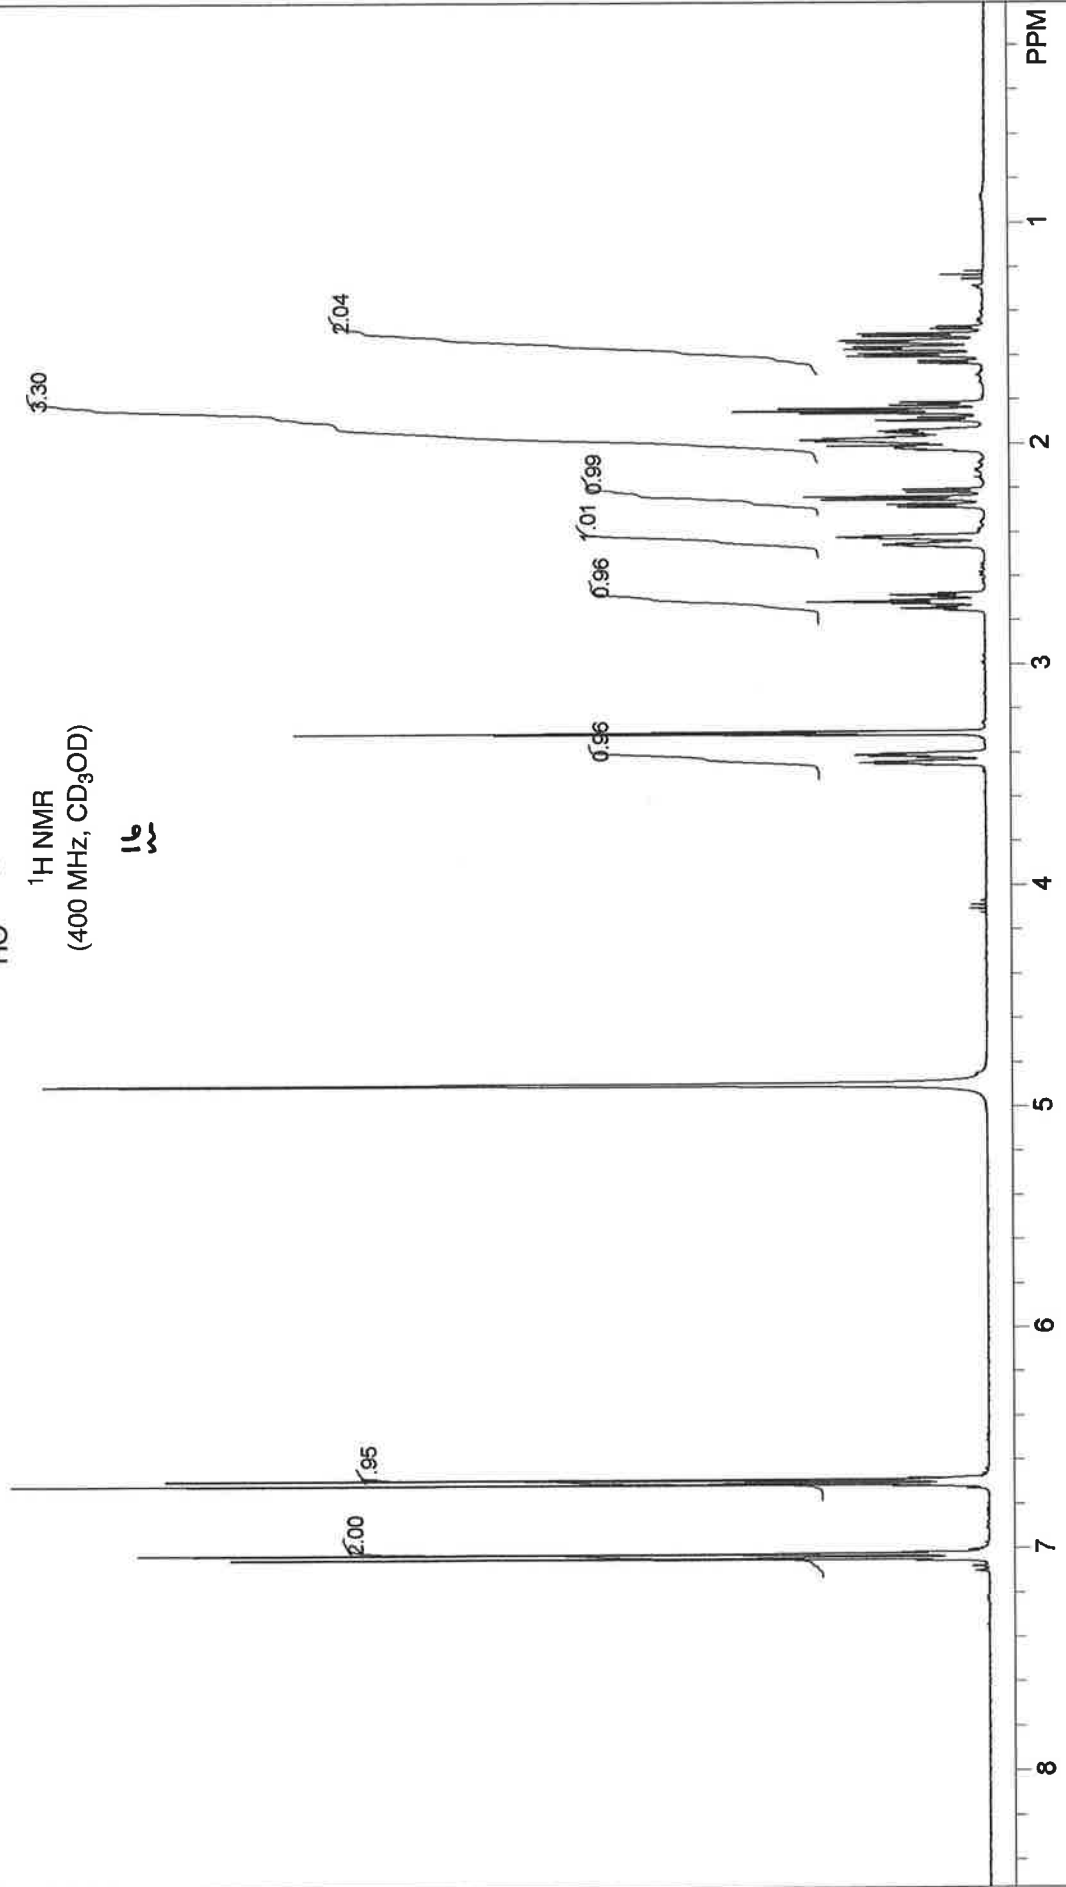

STANDARD 1H OBSERVE - profile

|             |             |             |             |              |                            |
|-------------|-------------|-------------|-------------|--------------|----------------------------|
| F1: 399.753 | F2: 100.527 | SW1: 6410   | OF1: 2901.8 | PTS1d: 13132 | USER: -- DATE: Feb 15 2007 |
| EX: s2pul   | PW: 7.7 us  | PD: 1.0 sec | NA: 8       | LB: 0.0      | 16384                      |
|             |             |             |             |              | Nuts - \$rkp134-crude.fid  |

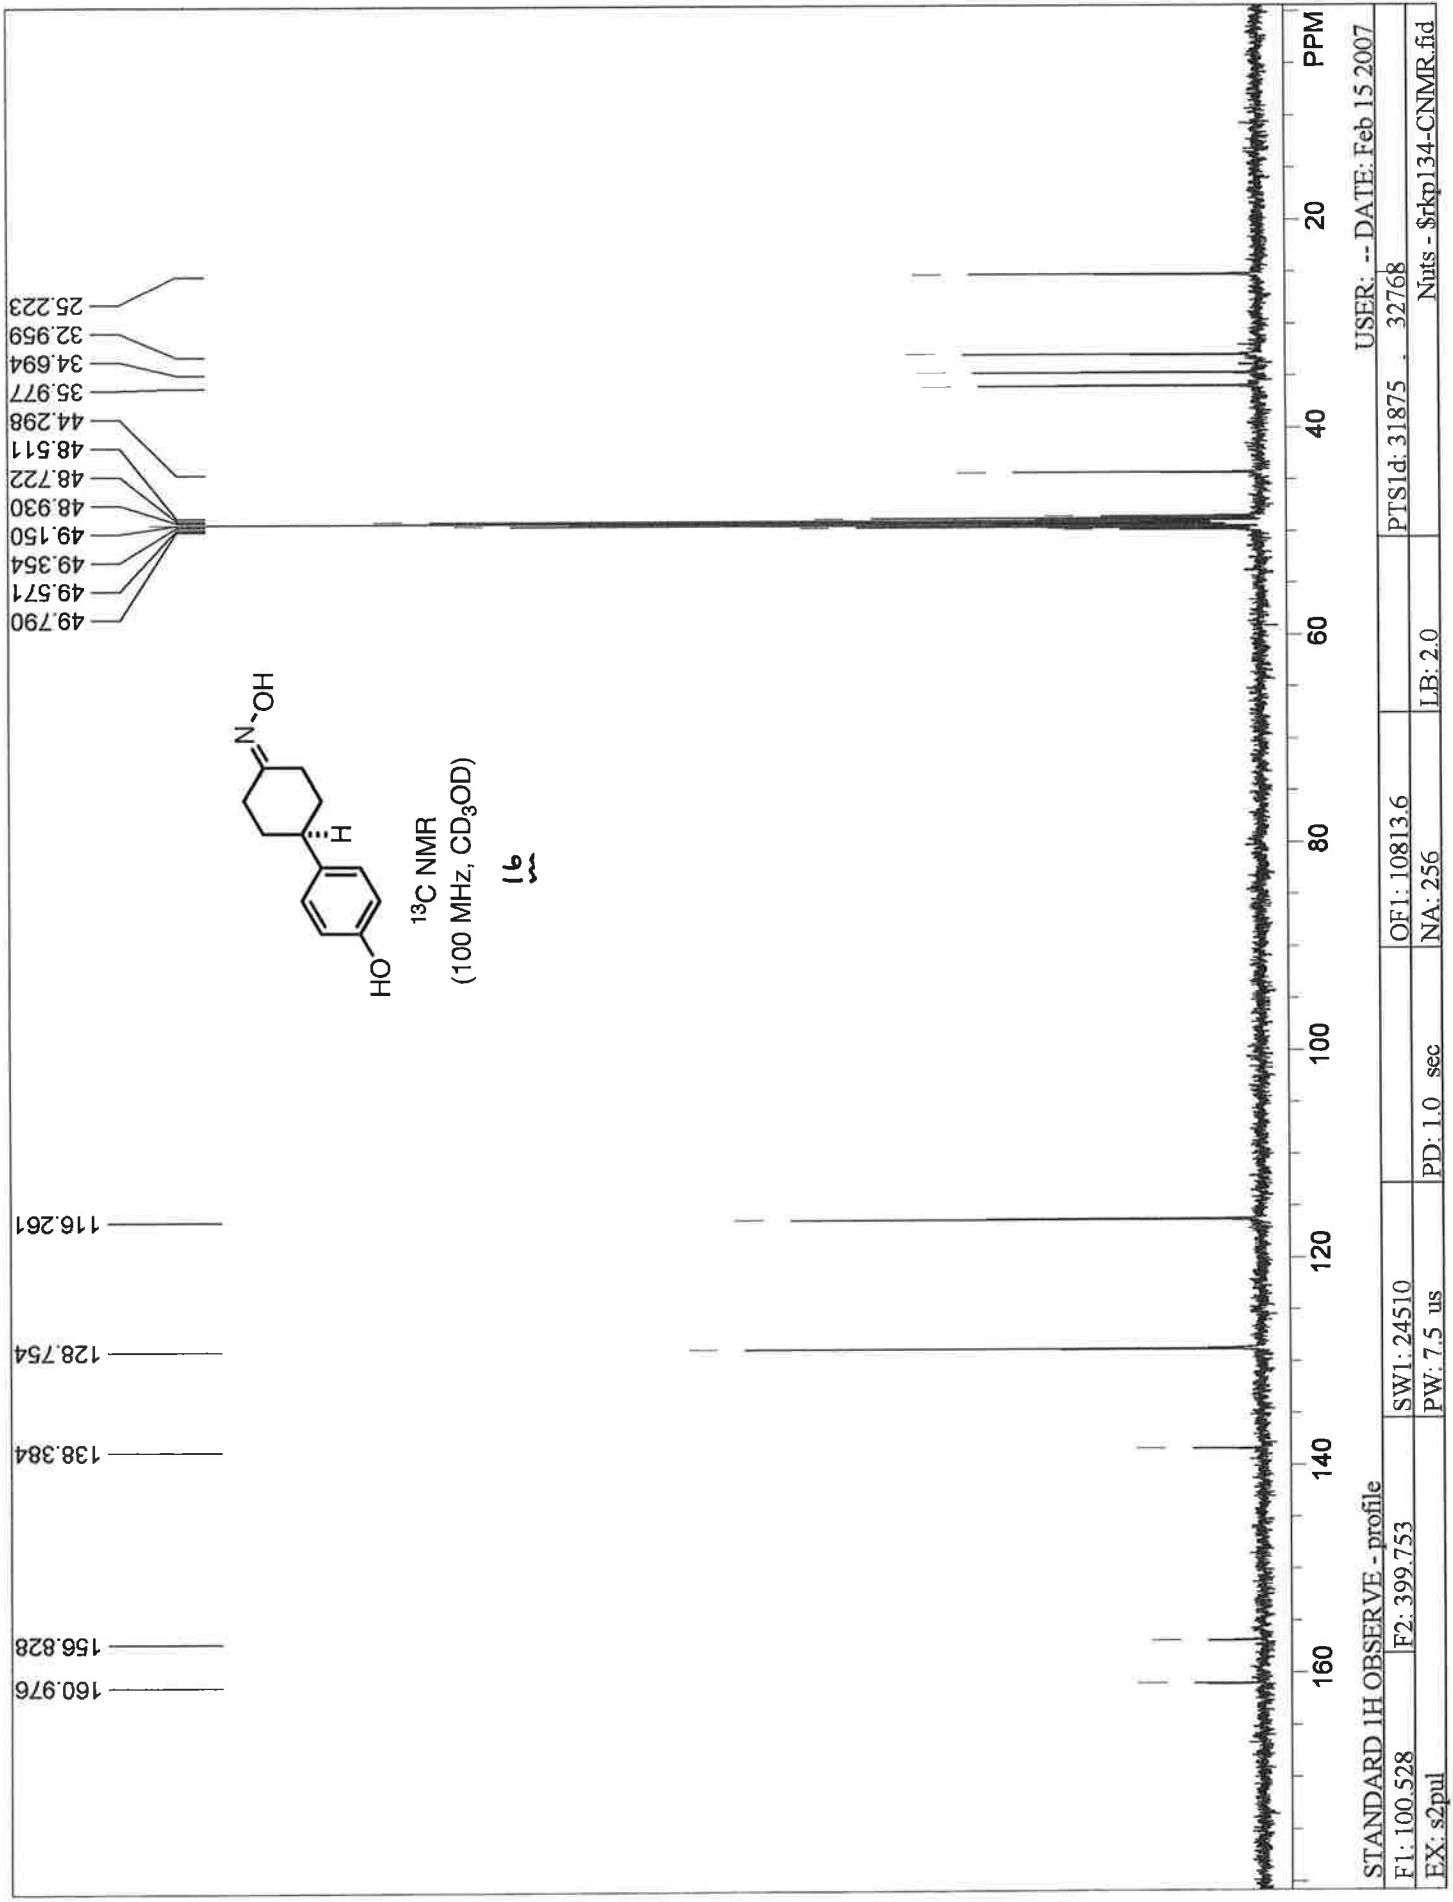

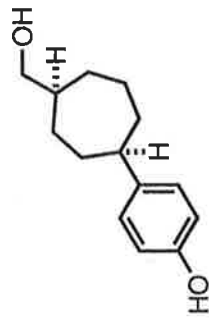

<sup>1</sup>H NMR  
(300 MHz, CDCl<sub>3</sub>)

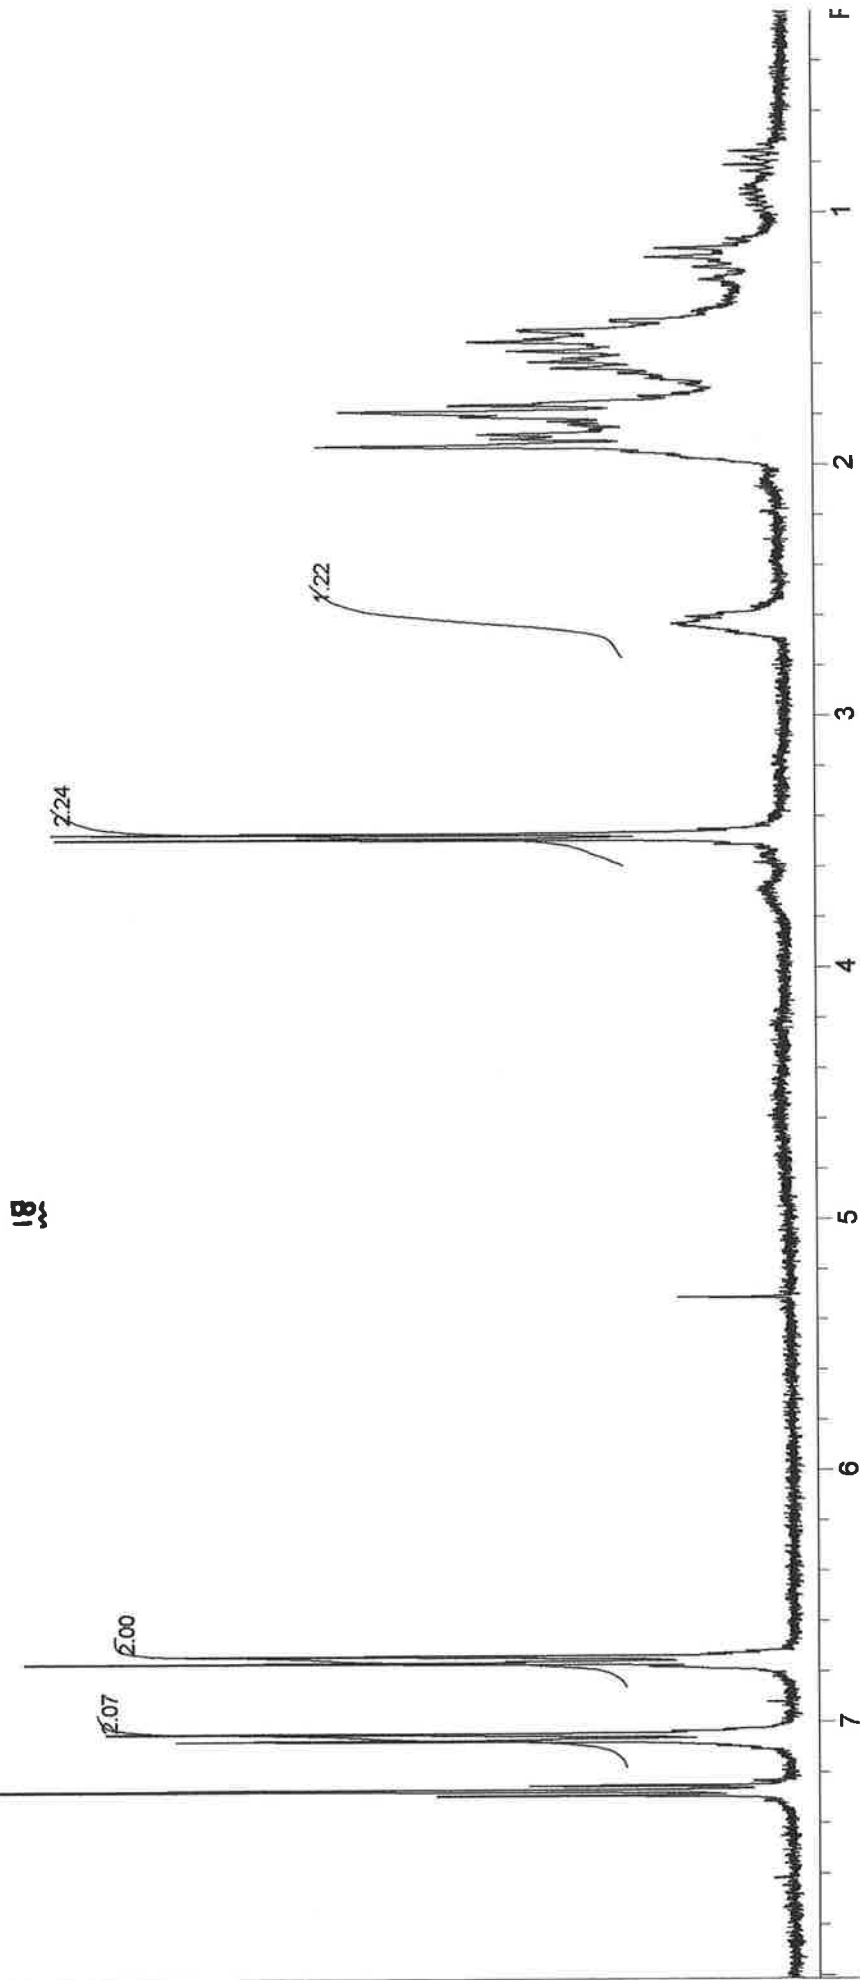

|                                 |             |                          |                            |
|---------------------------------|-------------|--------------------------|----------------------------|
| STANDARD 1H OBSERVE: blank line |             | USER: -- DATE: Oct 11 20 |                            |
| F1: 300.145                     | F2: 75.479  | PTS1d: 14430             | 16384                      |
| EX: s2pul                       | PD: 1.0 sec | LB: 0.0                  | Nuts - \$rkp086-II-F-HINMR |
| OF1: 1804.1                     | NA: 64      |                          |                            |



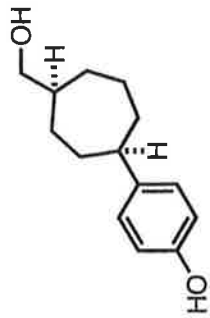

<sup>13</sup>C NMR  
(75 MHz, CDCl<sub>3</sub>)

18

46.050  
41.391  
38.846  
33.113  
31.577  
28.528  
27.526

77.649  
77.418  
77.230  
76.802  
68.587

127.888  
115.277

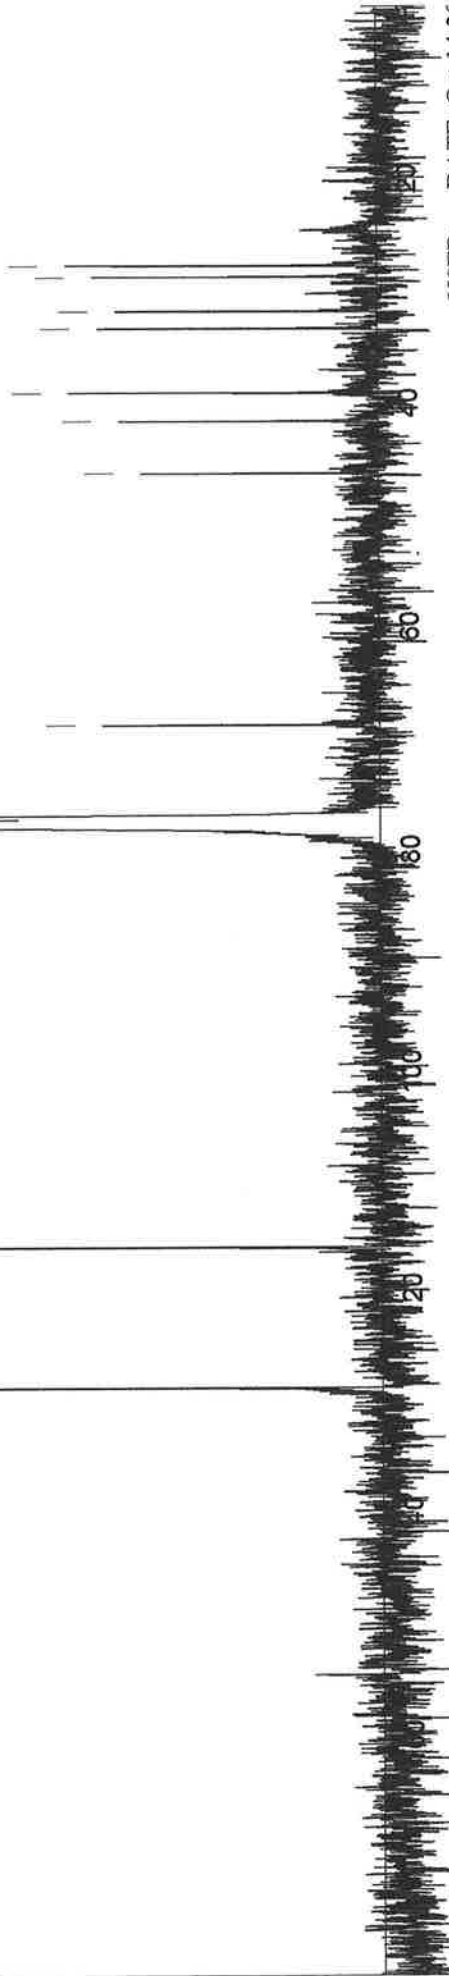

|                         |             |                          |                            |
|-------------------------|-------------|--------------------------|----------------------------|
| 13C OBSERVE: blank line |             | USER: -- DATE: Oct 14 20 |                            |
| F1: 75.479              | F2: 300.145 | PTS1d: 18868             | 32768                      |
| EX: s2pul               |             | LB: 2.0                  |                            |
|                         |             | NA: 24000                |                            |
|                         |             | OF1: 8300.1              |                            |
|                         |             | PD: 1.0 sec              |                            |
|                         |             | SW1: 18868               |                            |
|                         |             | PW: 7.3 us               |                            |
|                         |             |                          | Nuts - \$tkp086-II-F-CNMNR |

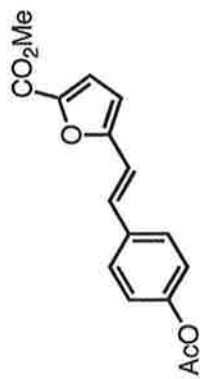

<sup>1</sup>H NMR  
(300 MHz, CDCl<sub>3</sub>)

19

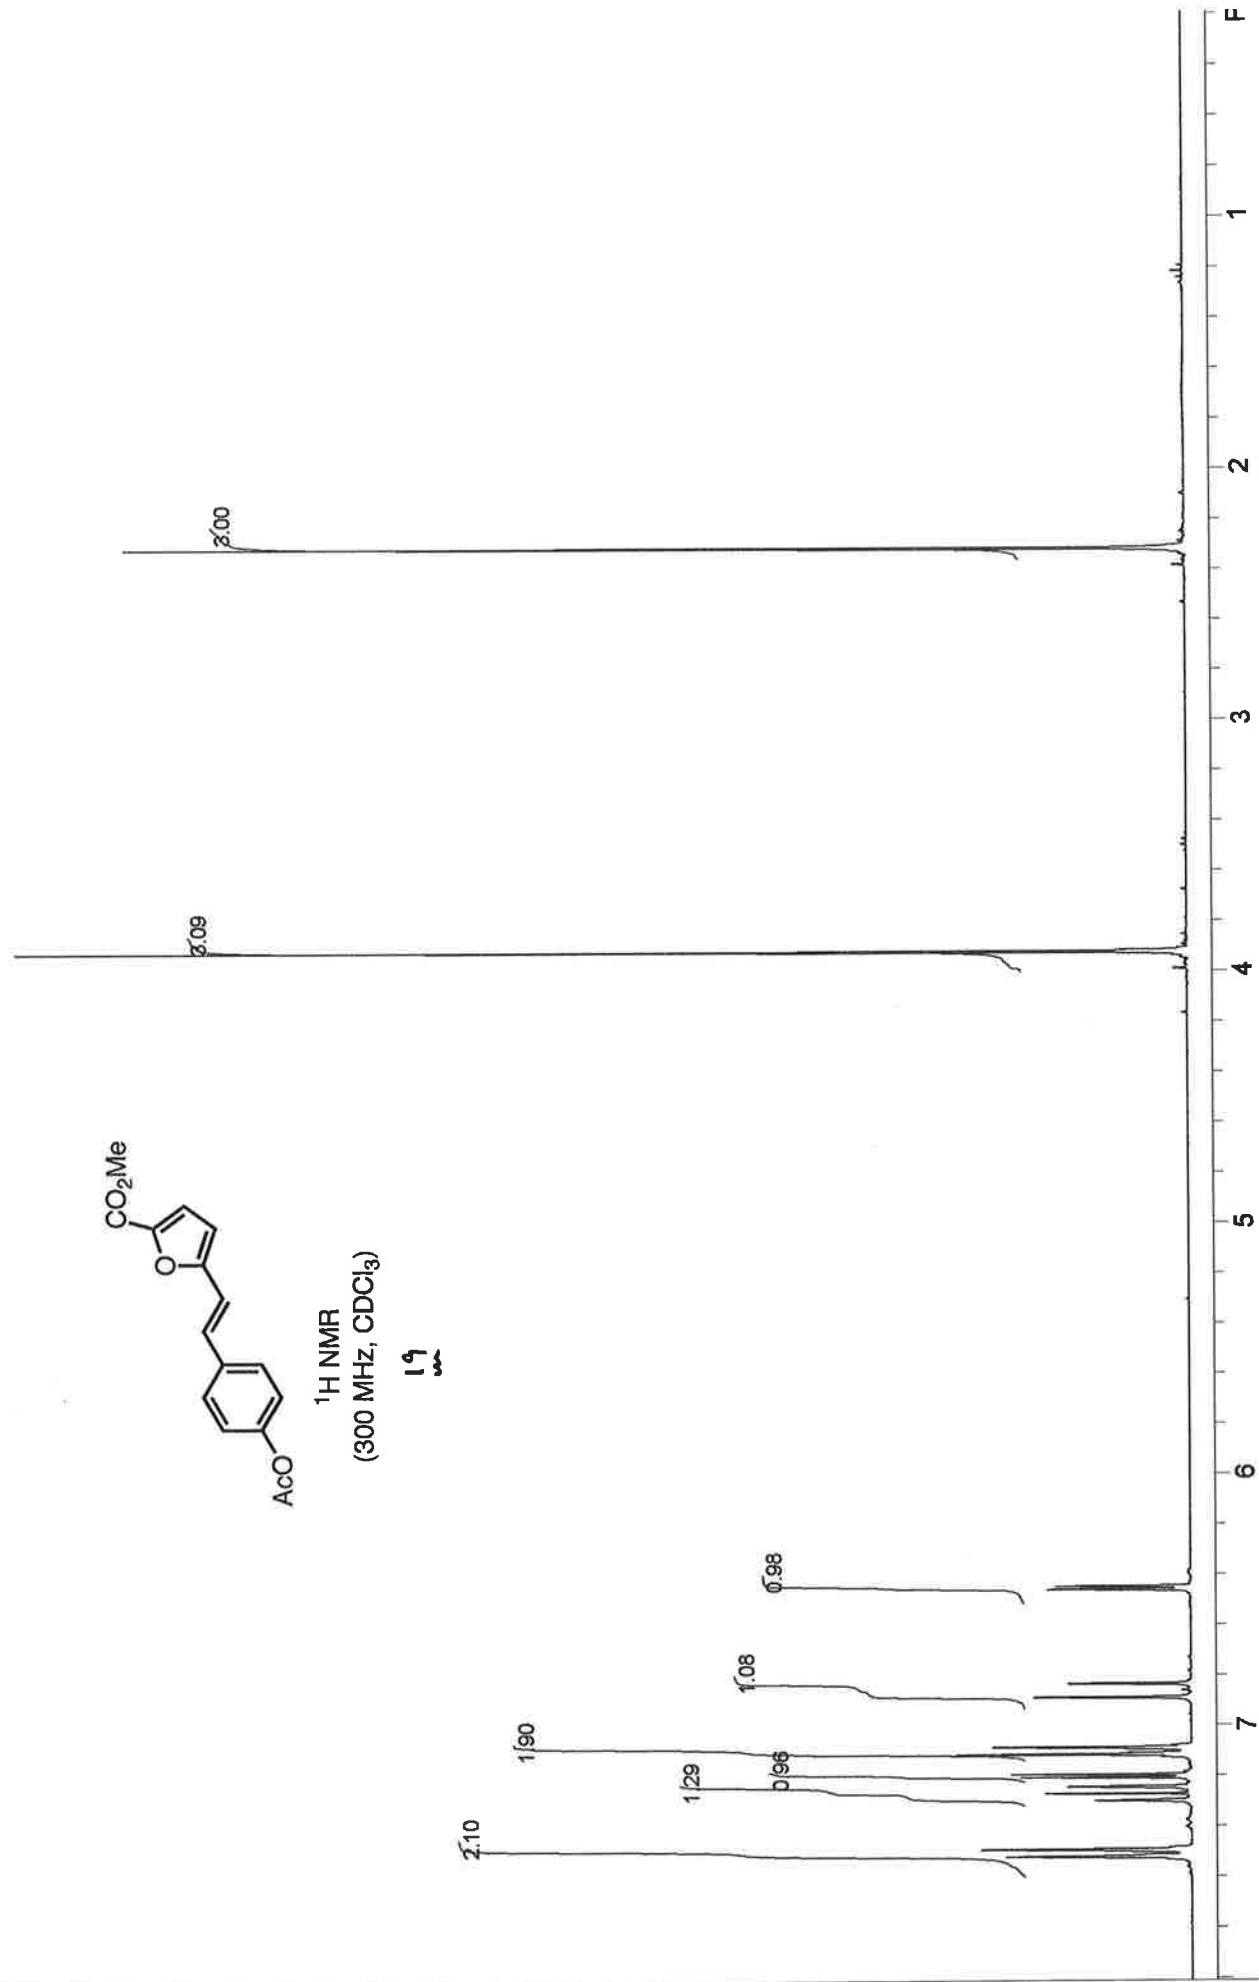

|                                |             |                          |                        |
|--------------------------------|-------------|--------------------------|------------------------|
| STANDARD 1H OBSERVE:blank line |             | USER: -- DATE: Sep 21 20 |                        |
| F1: 300.145                    | F2: 75.479  | PTS1:d: 14409            | 16384                  |
| EX: s2pul                      | PD: 1.0 sec | LB: 0.0                  | Nuts - \$rkp-HH-sample |

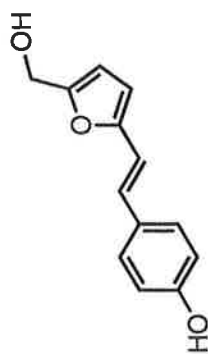

<sup>1</sup>H NMR  
(400 MHz, d<sub>6</sub>-acetone)

2.0

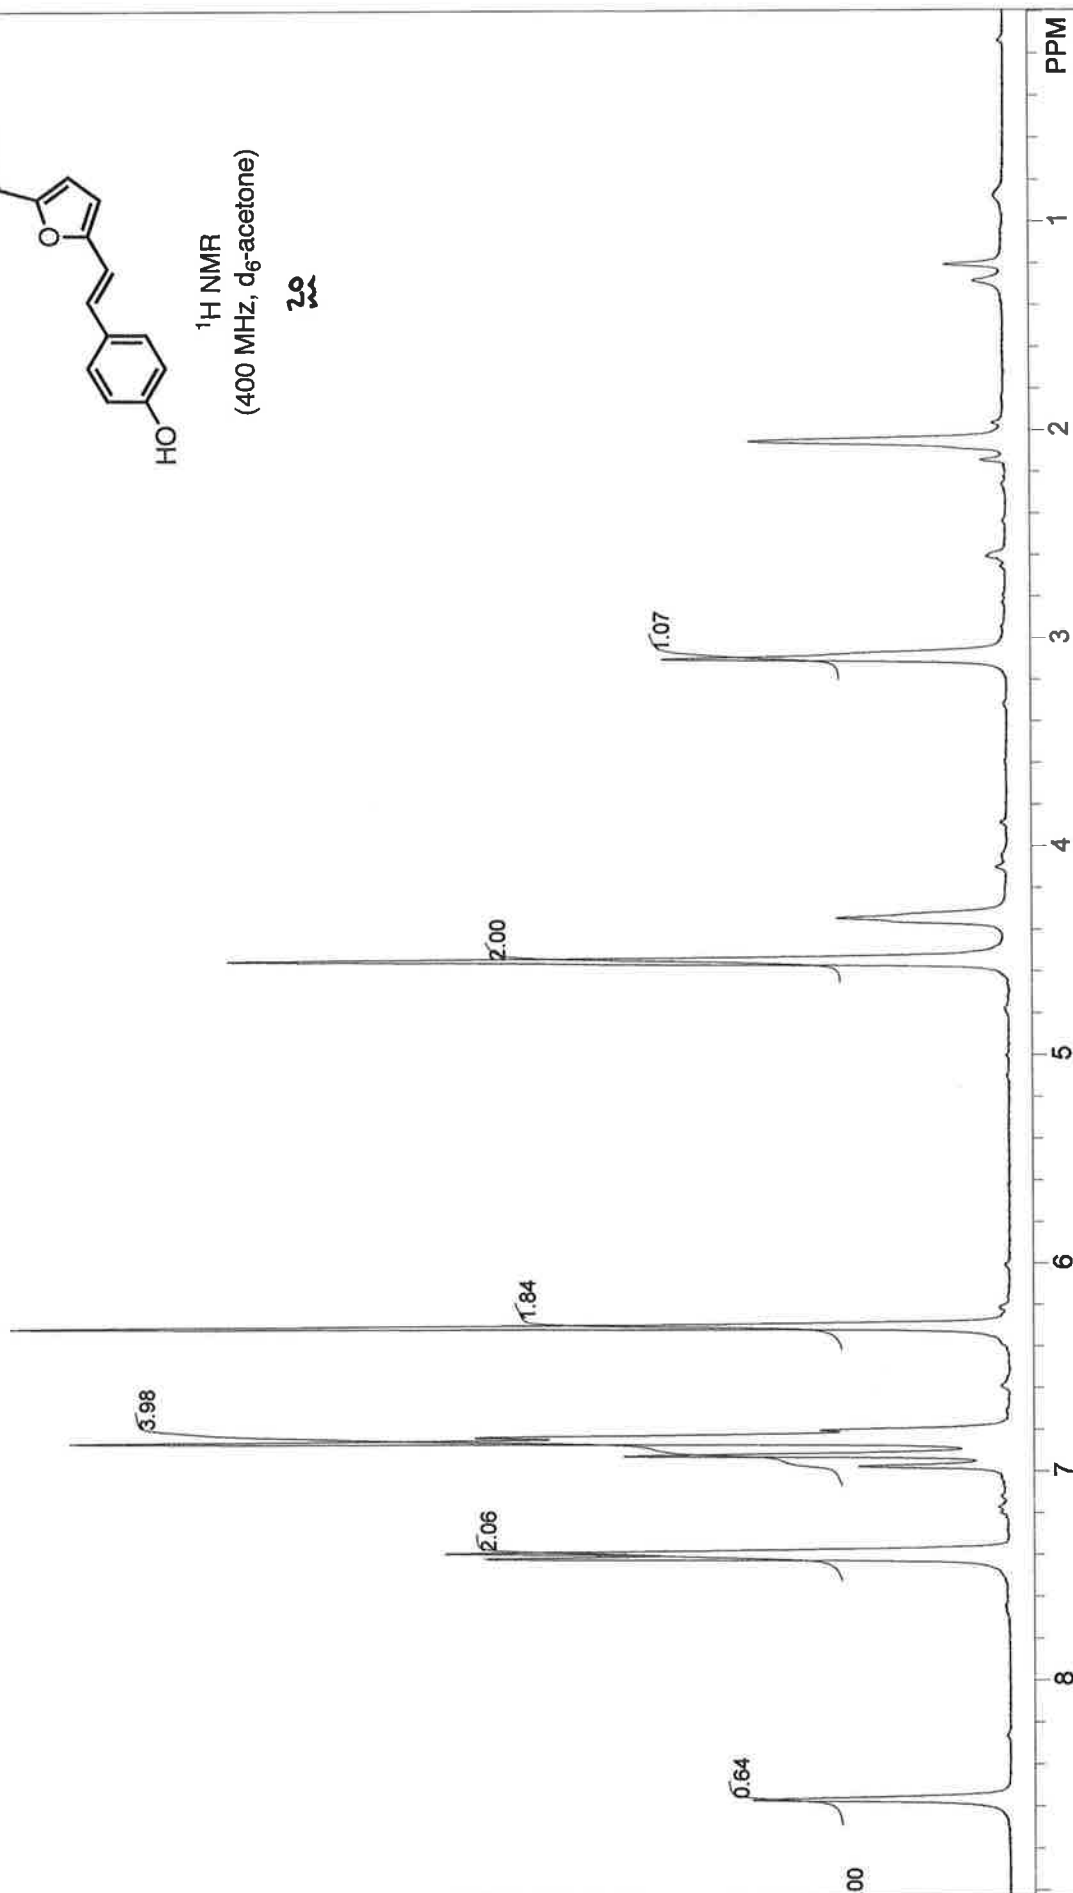

|                                |             |                            |                      |
|--------------------------------|-------------|----------------------------|----------------------|
| STANDARD 1H OBSERVE:blank line |             | USER: -- DATE: Sep 30 2006 |                      |
| F1: 300.147                    | F2: 75.479  | PTS1d: 14409               | 16384                |
| EX: s2pul                      | PD: 1.0 sec | OF1: 1800.9                | LB: 0.0              |
|                                |             | NA: 8                      | Nuts - \$rkp084-HNMR |

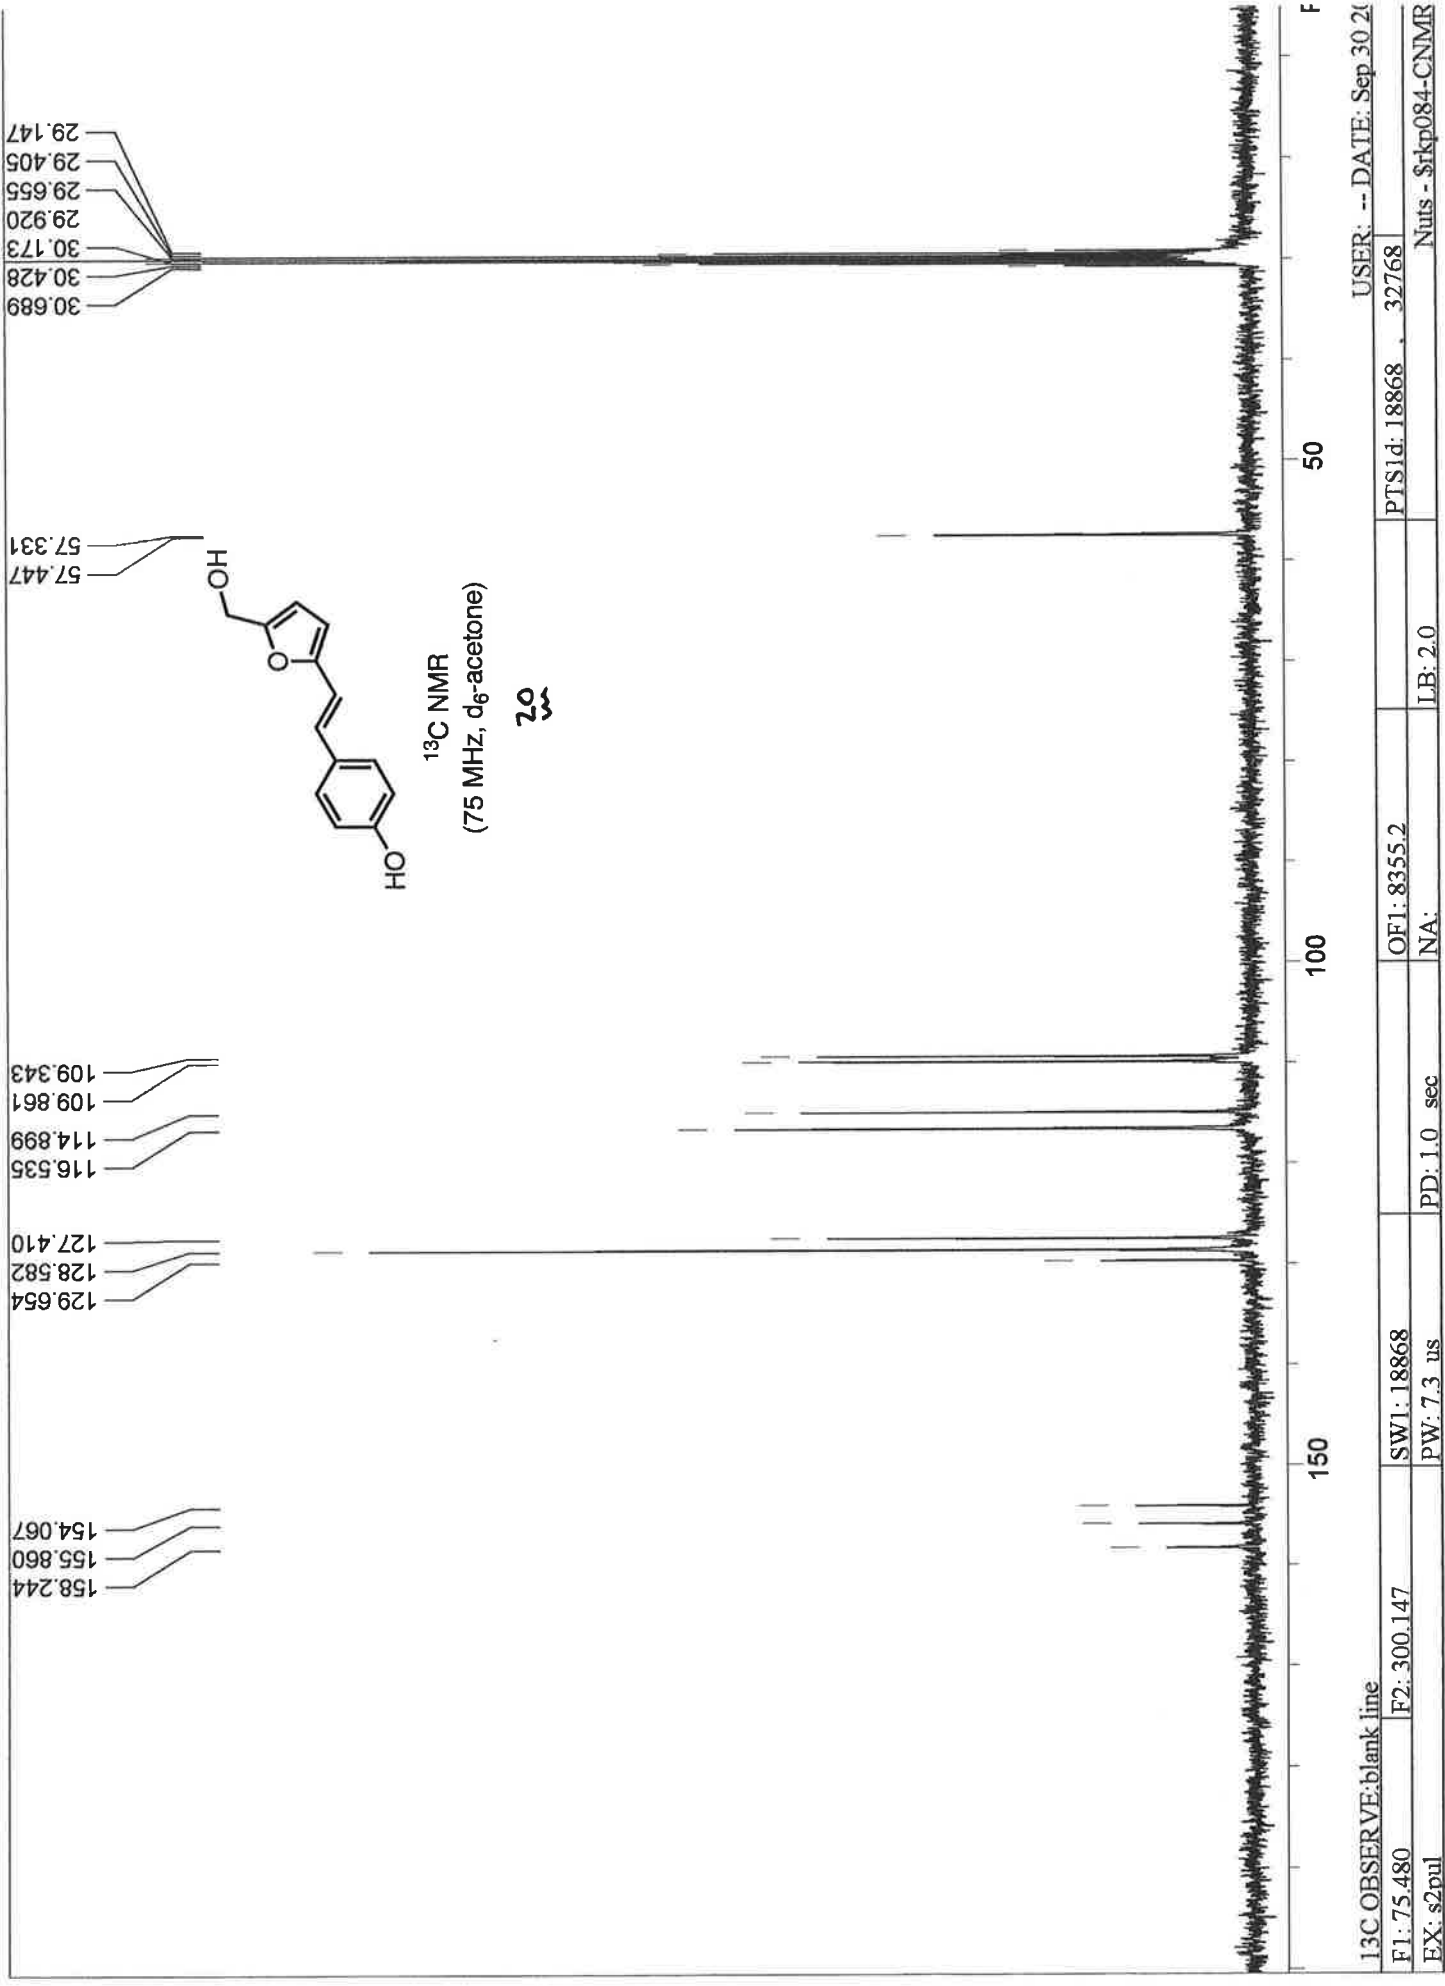

|                         |                          |
|-------------------------|--------------------------|
| 13C OBSERVE: blank line | USER: -- DATE: Sep 30 20 |
| F1: 75.480              | PTS1d: 18868 . 32768     |
| F2: 300.147             | OF1: 8355.2              |
| EX: s2pul               | NA:                      |
|                         | PD: 1.0 sec              |
|                         | PW: 7.3 us               |
|                         | LB: 2.0                  |
|                         | Nuts - \$rkp084-CNMIR    |
